# Supplementary material for: Impact of interactions among metabolic syndrome components on the development of cardiovascular disease among Kazakhs in Xinjiang
Source: PLoS One. 2018 Oct 16;13(10):e0205703. doi: 10.1371/journal.pone.0205703 (PMC6191126; doi:10.1371/journal.pone.0205703)
Supplement: S1 File — (XLS) [file pone.0205703.s001.xls]

## Sheet: Minimal data set
sex	smoking	drinking	hypertension(family history of hypertension)	diabetes(family history of diabetes)	CVD(family history of CVD)	age	CVD outcome(Number of newly developed CVD)	waistline	SBP(systolic blood pressure(SBP))	DBP(systolic blood pressure(DBP))	HDL(high-density lipoprotein cholesterol(HDL-C))	TG(triglyceride(TG))	FPG( fasting plasma glucose(FPG))	MS(MS binary categorical variable)	TGATP(TG binary categorical variable)	HDLATP(HDL binary categorical variable)	FPGATP(FPG binary categorical variable)	BPATP(BP binary categorical variable)	WCATP(WC binary categorical variable)	Table3BP(BP and other MS components associated with CVD)	Table3WC(WC and other MS components associated with CVD)	BP1MS1(dummy variable (when BP and MS coexisted))	BP1MS0(dummy variable (with BP and without MS ))	BP0MS1(dummy variable (without BP and with MS ))	WC1MS1(dummy variable (when WC and MS coexisted))	WC1MS0(dummy variable (without MSand with WC ))	WC0MS1(dummy variable (without WC and with MS ))	BP1WC1(dummy variable (when BP and WC coexisted))	BP1WC0(dummy variable (without WC and with BP ))	BP0WC1(dummy variable (without BP and with WC ))
1	1	1	1	0	1	36	1	90	100	70	1.26	0.38	4.24	1	1	1	1	0	1	7	5	0	0	1	1	0	0	0	0	1
1	1	1	1	0	0	45.01	1	105	120	70	1.04	4.15	8.64	1	1	1	1	0	1	7	5	0	0	1	1	0	0	0	0	1
2	0	0	1	0	0	29.11	1	90	124	78	0.63	4.7	5.77	1	1	1	1	0	1	7	5	0	0	1	1	0	0	0	0	1
2	1	0	0	0	0	57.06	1	99	120	80	1.19	2.41	6.75	1	1	1	1	0	1	7	5	0	0	1	1	0	0	0	0	1
2	1	1	0	0	0	55.08	1	75.3	116	75	1.56	0.99	6	1	1	1	1	0	0	7	7	0	0	1	0	0	1	0	0	0
2	0	0	0	0	0	49.05	1	82	129	81	1.62	1.83	6.31	1	1	1	1	0	1	7	5	0	0	1	1	0	0	0	0	1
1	0	0	0	0	0	71	1	87	120	80	0.6	3.1	7.29	1	1	1	1	0	0	7	7	0	0	1	0	0	1	0	0	0
2	0	0	0	0	0	46.11	1	89	126	70	1.15	2.68	7.05	1	1	1	1	0	1	7	5	0	0	1	1	0	0	0	0	1
2	1	0	1	0	0	37	0	72	119	71	0.88	3.02	5.6	1	1	1	1	0	0	7	7	0	0	1	0	0	1	0	0	0
2	1	0	1	0	0	40	0	88	120	80	1.36	1.33	5.61	1	1	1	1	0	1	7	5	0	0	1	1	0	0	0	0	1
2	0	0	1	1	0	39.02	0	83	128	80	1.53	1.62	5.8	1	1	1	1	0	1	7	5	0	0	1	1	0	0	0	0	1
2	0	0	1	0	0	58.07	0	94	120	79	1.51	1.39	6.9	1	1	1	1	0	1	7	5	0	0	1	1	0	0	0	0	1
1	0	0	1	0	1	46.1	0	95	129	74	0.94	1.76	6.43	1	1	1	1	0	1	7	5	0	0	1	1	0	0	0	0	1
1	0	0	1	0	0	24	0	79	127	78	0.87	2.22	7.95	1	1	1	1	0	0	7	7	0	0	1	0	0	1	0	0	0
2	0	0	1	0	0	39	0	88	124	68	1.64	2.77	6.53	1	1	1	1	0	1	7	5	0	0	1	1	0	0	0	0	1
2	0	0	1	0	0	41	0	86	110	80	0.77	2.93	5.63	1	1	1	1	0	1	7	5	0	0	1	1	0	0	0	0	1
1	0	1	1	0	0	40.11	0	86	122	70	1.9	0.5	6	1	1	1	1	0	0	7	7	0	0	1	0	0	1	0	0	0
1	1	0	0	0	0	49.08	0	81	124	76	1.49	2.13	6.9	1	1	1	1	0	0	7	7	0	0	1	0	0	1	0	0	0
1	1	0	0	0	0	39.06	0	105	121	82	0.98	2.22	6.4	1	1	1	1	0	1	7	5	0	0	1	1	0	0	0	0	1
1	1	0	0	0	0	34.03	0	107	115	70	0.93	2.43	6.69	1	1	1	1	0	1	7	5	0	0	1	1	0	0	0	0	1
2	1	0	0	0	0	51.07	0	80	112	81	1.01	1.1	6	1	1	1	1	0	1	7	5	0	0	1	1	0	0	0	0	1
2	1	0	0	0	0	37	0	75	116	71	0.71	2.42	11.96	1	1	1	1	0	0	7	7	0	0	1	0	0	1	0	0	0
2	1	0	0	0	0	58	0	95	121	72	1.17	4.3	6	1	1	1	1	0	1	7	5	0	0	1	1	0	0	0	0	1
2	1	1	0	0	0	59	0	76	110	70	1.38	1.53	5.83	1	1	1	1	0	0	7	7	0	0	1	0	0	1	0	0	0
1	0	0	0	0	0	31.09	0	90	110	70	0.69	12	6.73	1	1	1	1	0	1	7	5	0	0	1	1	0	0	0	0	1
2	0	0	0	0	0	44.11	0	90	110	69	1.18	2.35	7.17	1	1	1	1	0	1	7	5	0	0	1	1	0	0	0	0	1
2	0	0	0	0	0	38.09	0	96	111	72.5	0.83	3.05	6.36	1	1	1	1	0	1	7	5	0	0	1	1	0	0	0	0	1
2	0	0	0	0	0	28	0	69	120	70	0.86	2.16	5.74	1	1	1	1	0	0	7	7	0	0	1	0	0	1	0	0	0
2	0	0	0	0	0	23	0	71	110	70	0.79	3.2	5.89	1	1	1	1	0	0	7	7	0	0	1	0	0	1	0	0	0
2	0	0	0	0	0	30	0	55	90	60	0.76	3.6	5.74	1	1	1	1	0	0	7	7	0	0	1	0	0	1	0	0	0
2	0	0	0	0	0	28	0	78	100	80	1.04	0.67	5.81	1	1	1	1	0	0	7	7	0	0	1	0	0	1	0	0	0
2	0	0	0	0	0	56.05	0	78	120	80	1.01	0.86	6.41	1	1	1	1	0	0	7	7	0	0	1	0	0	1	0	0	0
2	0	0	0	0	0	50.08	0	122	120	70	1.14	1.73	8.26	1	1	1	1	0	1	7	5	0	0	1	1	0	0	0	0	1
2	0	0	0	0	0	34	0	87	90	60	0.88	2.44	7.06	1	1	1	1	0	1	7	5	0	0	1	1	0	0	0	0	1
2	0	0	0	0	0	25	0	80	111	80	0.6	1.71	6.47	1	1	1	1	0	1	7	5	0	0	1	1	0	0	0	0	1
2	0	0	0	0	0	26	0	82	120	80	0.9	5.4	5.78	1	1	1	1	0	1	7	5	0	0	1	1	0	0	0	0	1
2	0	0	0	0	0	42	0	85	110	80	1.03	3.4	5.68	1	1	1	1	0	1	7	5	0	0	1	1	0	0	0	0	1
2	0	0	0	0	0	35	0	90	90	60	0.74	2.11	6.11	1	1	1	1	0	1	7	5	0	0	1	1	0	0	0	0	1
2	0	0	0	0	0	32	0	90	128	64	0.63	4.7	5.77	1	1	1	1	0	1	7	5	0	0	1	1	0	0	0	0	1
2	0	1	0	0	0	40	0	85	128	78	1.55	0.86	6.67	1	1	1	1	0	1	7	5	0	0	1	1	0	0	0	0	1
2	1	0	1	0	0	59.09	1	93	123	83	1.19	1.56	5.12	0	0	1	0	0	1	7	3	0	0	0	0	1	0	0	0	1
1	1	0	1	0	0	51.11	1	90	126	80	1.4	0.76	4.96	0	0	0	0	0	1	7	2	0	0	0	0	1	0	0	0	1
1	1	0	1	0	0	69.08	1	76	120	68	0.95	0.6	4.3	0	0	1	0	0	0	7	7	0	0	0	0	0	0	0	0	0
2	1	0	1	0	0	42.02	1	87.8	119	83	1.42	0.85	5.1	0	0	0	0	0	1	7	2	0	0	0	0	1	0	0	0	1
1	1	0	1	0	1	41.04	1	78	124	78	1.39	1.42	3.86	0	0	0	0	0	0	1	1	0	0	0	0	0	0	0	0	0
2	1	0	1	0	0	37.09	1	89	120	82	1.17	1.05	5.27	0	0	1	0	0	1	7	3	0	0	0	0	1	0	0	0	1
2	1	0	1	0	0	49.08	1	76	120	60	1.02	3.3	4.64	0	1	1	0	0	0	7	7	0	0	0	0	0	0	0	0	0
2	1	0	1	0	1	55.11	1	85	98	68	0.97	1.57	5.02	0	0	1	0	0	1	7	3	0	0	0	0	1	0	0	0	1
1	1	0	1	0	0	40	1	80	120	70	0.65	1.14	3.86	0	0	1	0	0	0	7	7	0	0	0	0	0	0	0	0	0
2	1	0	1	0	0	42.05	1	59	100	70	1.15	1.06	4.61	0	0	1	0	0	0	7	7	0	0	0	0	0	0	0	0	0
1	1	0	1	0	1	53.11	1	97	110	80	0.85	1.54	4.69	0	0	1	0	0	1	7	3	0	0	0	0	1	0	0	0	1
2	1	0	1	0	0	46	1	78	110	80	1.04	0.89	5.04	0	0	1	0	0	0	7	7	0	0	0	0	0	0	0	0	0
1	1	1	1	0	0	36.09	1	97	119	67	1.04	1.83	4.52	0	1	0	0	0	1	7	3	0	0	0	0	1	0	0	0	1
2	0	0	1	0	0	36.09	1	87	120	83	1.26	1.05	4.29	0	0	1	0	0	1	7	3	0	0	0	0	1	0	0	0	1
2	0	0	1	0	0	48.1	1	83	96	65	1.32	0.57	5.2	0	0	0	0	0	1	7	2	0	0	0	0	1	0	0	0	1
2	0	0	1	0	0	43.04	1	82	126	70	1.37	0.74	7.43	0	0	0	1	0	1	7	3	0	0	0	0	1	0	0	0	1
2	0	0	1	0	0	44.09	1	70	124	75	1.65	0.58	3.61	0	0	0	0	0	0	1	1	0	0	0	0	0	0	0	0	0
2	0	0	1	0	0	46.1	1	78	111	72.5	1.4	0.68	5	0	0	0	0	0	0	1	1	0	0	0	0	0	0	0	0	0
1	0	0	1	0	0	65.06	1	98	120	80	1.4	1.15	8.48	0	0	0	1	0	1	7	3	0	0	0	0	1	0	0	0	1
2	0	0	1	0	0	40.03	1	93	110	70	1.44	1.37	5.57	0	0	0	0	0	1	7	2	0	0	0	0	1	0	0	0	1
2	0	0	1	0	0	33.11	1	89	111	80	0.59	3.06	5.06	1	1	1	0	0	1	7	4	0	0	0	0	1	0	0	0	1
2	0	0	1	0	0	41.1	1	85	110	70	1.76	2.01	5.19	0	1	0	0	0	1	7	3	0	0	0	0	1	0	0	0	1
2	0	0	1	0	1	62.1	1	101	110	80	1.29	5.4	4.91	1	1	1	0	0	1	7	4	0	0	0	0	1	0	0	0	1
2	0	0	1	0	0	48.06	1	94	123	80	1.49	0.94	5.5	1	1	1	0	0	1	7	4	0	0	0	0	1	0	0	0	1
1	0	0	1	0	0	49.04	1	111	114	80	0.97	0.77	3.72	0	0	1	0	0	1	7	3	0	0	0	0	1	0	0	0	1
2	0	0	1	0	0	29	1	76	100	61	1.71	1.56	5.78	0	0	0	1	0	0	7	7	0	0	0	0	0	0	0	0	0
2	0	0	1	0	0	49.09	1	90	100	80	1.75	1.32	5.59	0	0	0	0	0	1	7	2	0	0	0	0	1	0	0	0	1
2	0	0	1	0	1	31.02	1	80	111	66	1.83	1.77	4.9	0	1	0	0	0	1	7	3	0	0	0	0	1	0	0	0	1
1	0	0	1	0	0	26.01	1	68	99	69	1.61	0.44	4.65	0	0	0	0	0	0	1	1	0	0	0	0	0	0	0	0	0
2	0	0	1	0	0	39	1	100	110	71	0.68	1.7	4.77	1	1	1	0	0	1	7	4	0	0	0	0	1	0	0	0	1
2	0	0	1	0	0	37.08	1	68	116	80	1.53	0.91	5.07	0	0	0	0	0	0	1	1	0	0	0	0	0	0	0	0	0
1	0	0	1	0	0	31.03	1	95	120	78	1.21	0.75	5.34	0	0	0	0	0	1	7	2	0	0	0	0	1	0	0	0	1
2	0	0	1	0	1	32	1	86	120	70	0.93	1.7	5.21	1	1	1	0	0	1	7	4	0	0	0	0	1	0	0	0	1
1	1	0	0	0	0	54.03	1	82	120	79	1.44	1.19	4.88	0	0	0	0	0	0	1	1	0	0	0	0	0	0	0	0	0
1	1	0	0	0	1	46.01	1	86	107	69	1.11	2.47	4.45	0	1	0	0	0	0	7	7	0	0	0	0	0	0	0	0	0
2	1	0	0	0	1	48.06	1	89	108	76	1.19	1.01	5.57	0	0	1	0	0	1	7	3	0	0	0	0	1	0	0	0	1
2	1	0	0	0	0	47.11	1	73	122	78	1.08	0.9	5.1	0	0	1	0	0	0	7	7	0	0	0	0	0	0	0	0	0
1	1	0	0	0	0	48.05	1	82	120	73	1.1	1.39	6.1	0	0	0	1	0	0	7	7	0	0	0	0	0	0	0	0	0
1	1	0	0	0	0	34.09	1	80	90	60	1.06	0.58	3.68	0	0	0	0	0	0	1	1	0	0	0	0	0	0	0	0	0
1	1	0	0	0	0	54.11	1	86	120	80	1.11	0.78	4.61	0	0	0	0	0	0	1	1	0	0	0	0	0	0	0	0	0
2	1	0	0	0	0	40.08	1	78	120	72	1.61	1.31	4.49	0	0	0	0	0	0	1	1	0	0	0	0	0	0	0	0	0
2	1	0	0	0	0	59.08	1	73	111	79	1.56	0.99	4.6	0	0	0	0	0	0	1	1	0	0	0	0	0	0	0	0	0
2	1	0	0	0	0	54.06	1	65	107	78	1.02	0.54	4.24	0	0	1	0	0	0	7	7	0	0	0	0	0	0	0	0	0
1	1	0	0	0	0	38.09	1	85	115.5	70	1.54	1.06	5.3	0	0	0	0	0	0	1	1	0	0	0	0	0	0	0	0	0
1	1	0	0	0	0	48.09	1	94	121	83	1.16	0.96	4.8	0	0	0	0	0	1	7	2	0	0	0	0	1	0	0	0	1
1	1	0	0	0	0	74	1	73	106	67	1.11	0.77	6.19	0	0	0	1	0	0	7	7	0	0	0	0	0	0	0	0	0
2	1	0	0	0	0	59.06	1	72	126	79	2.35	1.47	5.4	0	0	0	0	0	0	1	1	0	0	0	0	0	0	0	0	0
2	1	0	0	0	1	56	1	90	120	70	1.02	1.37	7.61	1	0	1	1	0	1	7	4	0	0	0	0	1	0	0	0	1
2	1	0	0	0	0	46.05	1	88.6	102	71	1.32	1.86	6.89	1	1	0	1	0	1	7	4	0	0	0	0	1	0	0	0	1
2	1	0	0	0	0	64.72	1	84	110	80	2.11	1.16	4.89	0	0	0	0	0	1	7	2	0	0	0	0	1	0	0	0	1
1	1	1	0	0	0	52.06	1	75	115	75	2.64	1.02	7.02	0	0	0	1	0	0	7	7	0	0	0	0	0	0	0	0	0
1	1	1	0	0	0	51.11	1	81	124	76	2.24	0.77	6.85	0	0	0	1	0	0	7	7	0	0	0	0	0	0	0	0	0
2	0	0	0	0	0	47.02	1	79	124	84	1.82	0.93	4.94	0	0	0	0	0	0	1	1	0	0	0	0	0	0	0	0	0
2	0	0	0	0	0	41.1	1	78	122	84	1.47	0.65	4.87	0	0	0	0	0	0	1	1	0	0	0	0	0	0	0	0	0
2	0	0	0	0	0	38.09	1	78	129	79	1.6	0.97	6.07	0	0	0	1	0	0	7	7	0	0	0	0	0	0	0	0	0
2	0	0	0	0	0	41.11	1	80.9	129	81	1.26	0.83	4.56	0	0	1	0	0	1	7	3	0	0	0	0	1	0	0	0	1
2	0	0	0	0	0	49.07	1	86.1	119	82	1.5	0.51	5.7	0	0	0	1	0	1	7	3	0	0	0	0	1	0	0	0	1
2	0	0	0	0	0	40.09	1	74.1	113	74	1.25	0.8	6.27	0	0	1	1	0	0	7	7	0	0	0	0	0	0	0	0	0
1	0	0	0	0	1	31.03	1	75	124	78	2.25	0.62	6.59	0	0	0	1	0	0	7	7	0	0	0	0	0	0	0	0	0
2	0	0	0	0	0	58.01	1	90	126	80	1.44	1.44	4.37	0	0	0	0	0	1	7	2	0	0	0	0	1	0	0	0	1
2	0	0	0	0	0	44.08	1	84	116	80	1.41	1.67	5.26	0	0	0	0	0	1	7	2	0	0	0	0	1	0	0	0	1
2	0	0	0	0	0	41.06	1	90	120	79	1.54	0.93	5.1	0	0	0	0	0	1	7	2	0	0	0	0	1	0	0	0	1
1	0	0	0	0	0	65	1	84	112	72	1.32	0.99	10.88	0	0	0	1	0	0	7	7	0	0	0	0	0	0	0	0	0
2	0	0	0	0	0	37.09	1	72	120	80	0.82	3.6	4.4	0	1	1	0	0	0	7	7	0	0	0	0	0	0	0	0	0
2	0	0	0	0	0	43.1	1	84	120	80	1.52	1.24	4.86	0	0	0	0	0	1	7	2	0	0	0	0	1	0	0	0	1
2	0	0	0	0	0	46.11	1	84	124	80	1.32	1.27	2.54	0	0	0	0	0	1	7	2	0	0	0	0	1	0	0	0	1
2	0	0	0	0	0	41.07	1	97	110	70	1.58	1.4	5.05	0	0	0	0	0	1	7	2	0	0	0	0	1	0	0	0	1
2	0	0	0	0	0	39.07	1	92	110	82	1.4	1.38	4.72	0	0	0	0	0	1	7	2	0	0	0	0	1	0	0	0	1
2	0	0	0	0	0	26.1	1	85	116	60	1.03	1.61	4.8	0	0	1	0	0	1	7	3	0	0	0	0	1	0	0	0	1
2	0	0	0	0	0	47	1	95	110	70	1.07	0.95	5.68	1	0	1	1	0	1	7	4	0	0	0	0	1	0	0	0	1
2	0	0	0	0	0	45.02	1	84	121	80	1.84	1.61	6.03	0	0	0	1	0	1	7	3	0	0	0	0	1	0	0	0	1
2	0	0	0	0	0	51.04	1	75	120	84	0.86	1.07	4.31	0	0	1	0	0	0	7	7	0	0	0	0	0	0	0	0	0
2	0	0	0	0	0	43.08	1	74	100	80	1.57	0.81	5.05	0	0	0	0	0	0	1	1	0	0	0	0	0	0	0	0	0
2	0	0	0	0	0	43.05	1	72.8	119	69	0.99	0.82	4.44	0	0	1	0	0	0	7	7	0	0	0	0	0	0	0	0	0
2	0	0	0	0	0	33.06	1	96	110	60	1.29	0.6	5.4	0	0	1	0	0	1	7	3	0	0	0	0	1	0	0	0	1
2	0	0	0	0	0	35	1	72	110	70	0.9	1.62	4.66	0	0	1	0	0	0	7	7	0	0	0	0	0	0	0	0	0
2	0	0	0	0	0	56.02	1	98	110	80	1.13	1.64	6.97	1	0	1	1	0	1	7	4	0	0	0	0	1	0	0	0	1
2	0	0	0	0	0	68.11	1	87	109	71	1.28	1.29	5.41	0	0	1	0	0	1	7	3	0	0	0	0	1	0	0	0	1
2	0	0	0	0	0	63	1	96	120	80	1.5	0.98	5.13	0	0	0	0	0	1	7	2	0	0	0	0	1	0	0	0	1
2	0	0	0	0	0	46	1	74	110	70	1.27	0.87	6.79	0	0	1	1	0	0	7	7	0	0	0	0	0	0	0	0	0
1	0	0	0	0	0	38	1	100	120	80	0.81	0.38	3.93	0	0	1	0	0	1	7	3	0	0	0	0	1	0	0	0	1
2	0	0	0	0	0	46.07	1	103	123	80	1.51	0.66	4.55	0	0	0	0	0	1	7	2	0	0	0	0	1	0	0	0	1
1	0	0	0	0	0	56.09	1	95	125	82.5	2.09	1.45	5.3	0	0	0	0	0	1	7	2	0	0	0	0	1	0	0	0	1
1	0	0	0	0	0	24	1	80	100	70	0.94	5.5	4.63	0	1	1	0	0	0	7	7	0	0	0	0	0	0	0	0	0
2	0	0	0	0	0	40	1	75	114	72	1.36	1.15	5.51	0	0	0	0	0	0	1	1	0	0	0	0	0	0	0	0	0
2	0	0	0	0	0	50.11	1	78	111	70	0.84	0.55	4.08	0	0	1	0	0	0	7	7	0	0	0	0	0	0	0	0	0
2	0	0	0	0	0	52	1	68	120	70	1.35	1.3	5.59	0	0	0	0	0	0	1	1	0	0	0	0	0	0	0	0	0
2	0	0	0	0	0	62.1	1	90	110	80	1.79	0.65	4.9	0	0	0	0	0	1	7	2	0	0	0	0	1	0	0	0	1
2	0	0	0	0	1	56.03	1	86	128	80	1.12	0.87	5.65	1	0	1	1	0	1	7	4	0	0	0	0	1	0	0	0	1
1	0	1	0	0	0	50.05	1	98.8	119	72	1.52	1.92	9.94	1	1	0	1	0	1	7	4	0	0	0	0	1	0	0	0	1
2	1	0	1	0	0	43.07	1	72	156	100	1.69	1.81	5.95	1	1	0	1	1	0	4	7	0	1	0	0	0	0	0	1	0
2	1	0	1	0	0	55.07	1	105	172	120	1.4	3.23	8.12	1	1	0	1	1	1	5	5	0	1	0	0	1	0	1	0	0
1	1	0	1	0	0	50.06	1	78.9	168	87	1.61	0.63	5.12	0	0	0	0	1	0	2	7	0	1	0	0	0	0	0	1	0
2	1	0	1	0	0	52.05	1	72	150	80	0.93	0.77	4.68	0	0	1	0	1	0	3	7	0	1	0	0	0	0	0	1	0
2	1	0	1	0	1	42.01	1	85	150	108	1.25	1.02	5.82	1	0	1	1	1	1	5	5	0	1	0	0	1	0	1	0	0
2	1	0	1	0	1	55.07	1	84	130	80	1.69	0.97	4.8	0	0	0	0	1	1	3	3	0	1	0	0	1	0	1	0	0
1	1	0	1	0	0	35	1	83	124	90	1.31	0.73	6.42	0	0	0	1	1	0	3	7	0	1	0	0	0	0	0	1	0
2	1	0	1	0	0	61.02	1	118	150	89	1.45	0.61	5.6	1	0	0	1	1	1	4	4	0	1	0	0	1	0	1	0	0
2	1	0	1	0	0	51.07	1	96	130	90	1.36	1.46	4.59	0	0	0	0	1	1	3	3	0	1	0	0	1	0	1	0	0
2	1	0	1	0	0	69.09	1	80	166	84	1.49	0.75	4.95	0	0	0	0	1	1	3	3	0	1	0	0	1	0	1	0	0
1	1	0	1	0	0	53.03	1	87	130	100	0.59	3.92	5.32	1	1	1	0	1	0	4	7	0	1	0	0	0	0	0	1	0
1	1	0	1	0	0	49.08	1	91	102.5	87.5	0.92	2.01	5.1	1	1	1	0	1	1	5	5	0	1	0	0	1	0	1	0	0
1	1	0	1	0	0	51.07	1	104	150	109	1.28	0.65	4.75	1	1	1	0	1	1	5	5	0	1	0	0	1	0	1	0	0
2	1	0	1	0	1	55.03	1	85	180	125	1.06	1.14	4.02	1	0	1	0	1	1	4	4	0	1	0	0	1	0	1	0	0
1	1	0	1	0	0	47.09	1	96	130	80	0.73	0.75	9.04	1	0	1	1	1	1	5	5	0	1	0	0	1	0	1	0	0
2	1	0	1	0	0	60	1	72	140	90	1.28	0.69	5.75	1	0	1	1	1	0	4	7	0	1	0	0	0	0	0	1	0
1	1	0	1	0	1	54.09	1	105	140	90	0.96	0.84	4.74	1	0	1	0	1	1	4	4	0	1	0	0	1	0	1	0	0
1	1	1	1	0	0	65.11	1	87	188	108	1.55	0.48	5.3	0	0	0	0	1	0	2	7	0	1	0	0	0	0	0	1	0
1	1	1	1	0	0	63.03	1	79.4	200	102	1.13	1.18	5.57	0	0	0	0	1	0	2	7	0	1	0	0	0	0	0	1	0
1	1	1	1	0	0	49.04	1	86	152	95	1.76	1.18	6.13	0	0	0	1	1	0	3	7	0	1	0	0	0	0	0	1	0
1	1	1	1	0	1	58.11	1	81	201	125	2.07	0.85	5.8	0	0	0	1	1	0	3	7	0	1	0	0	0	0	0	1	0
1	1	1	1	0	0	64.02	1	101	170	96	0.85	1.51	5.02	1	0	1	0	1	1	4	4	0	1	0	0	1	0	1	0	0
1	1	1	1	0	0	38.07	1	92	130	88	1.25	1.5	6.28	1	0	0	1	1	1	4	4	0	1	0	0	1	0	1	0	0
1	1	1	1	0	0	49.04	1	75	205	115	1.16	1.15	4.86	0	0	0	0	1	0	2	7	0	1	0	0	0	0	0	1	0
1	1	1	1	0	0	64.11	1	90	222	147	1.14	0.74	5	0	0	0	0	1	1	3	3	0	1	0	0	1	0	1	0	0
1	1	1	1	0	0	47.08	1	82	170	100	1.22	1.32	5.1	0	0	0	0	1	0	2	7	0	1	0	0	0	0	0	1	0
1	0	0	1	0	0	32.03	1	109	104	86	0.98	2.31	4.32	1	1	1	0	1	1	5	5	0	1	0	0	1	0	1	0	0
2	0	0	1	0	1	45.07	1	91	159	110	1.37	2.59	4.35	1	1	0	0	1	1	4	4	0	1	0	0	1	0	1	0	0
2	0	0	1	0	0	46.03	1	73	130	83	1.73	0.91	4.51	0	0	0	0	1	0	2	7	0	1	0	0	0	0	0	1	0
1	0	0	1	0	0	46.02	1	99	126	86	1.12	1.35	5.37	0	0	0	0	1	1	3	3	0	1	0	0	1	0	1	0	0
2	0	0	1	0	0	32.08	1	80	140	98	1.11	0.41	4.44	1	0	1	0	1	1	4	4	0	1	0	0	1	0	1	0	0
2	0	0	1	0	0	39.04	1	82	143	99	1.25	0.45	3.75	1	0	1	0	1	1	4	4	0	1	0	0	1	0	1	0	0
2	0	0	1	0	0	41.09	1	83	130	83	1.02	1.43	4.31	1	0	1	0	1	1	4	4	0	1	0	0	1	0	1	0	0
2	0	0	1	0	0	40.09	1	82	144	87	1.06	1.14	4.8	1	0	1	0	1	1	4	4	0	1	0	0	1	0	1	0	0
2	0	0	1	0	0	49.03	1	90	172	97	1.15	0.82	5.23	1	0	1	0	1	1	4	4	0	1	0	0	1	0	1	0	0
2	0	0	1	0	0	45.11	1	92	128	89	1.33	0.53	5.32	0	0	0	0	1	1	3	3	0	1	0	0	1	0	1	0	0
2	0	0	1	0	0	51.07	1	80	129	93	1.96	0.62	4.37	0	0	0	0	1	1	3	3	0	1	0	0	1	0	1	0	0
2	0	0	1	0	0	42.1	1	91.4	129	88	1.43	0.52	4.9	0	0	0	0	1	1	3	3	0	1	0	0	1	0	1	0	0
2	0	0	1	0	0	42.09	1	92	139	87	1.84	1.12	4.97	0	0	0	0	1	1	3	3	0	1	0	0	1	0	1	0	0
2	0	0	1	0	0	55.09	1	98	165	108	1.5	1.37	4.88	0	0	0	0	1	1	3	3	0	1	0	0	1	0	1	0	0
2	0	0	1	0	0	47.05	1	82	137	90	1.43	0.8	6.6	1	0	0	1	1	1	4	4	0	1	0	0	1	0	1	0	0
2	0	0	1	0	1	35.03	1	87.8	131	77	0.87	0.47	4	1	0	1	0	1	1	4	4	0	1	0	0	1	0	1	0	0
2	0	0	1	0	0	37.09	1	90	120	88	2.14	1.05	6	1	0	0	1	1	1	4	4	0	1	0	0	1	0	1	0	0
2	0	0	1	0	0	35.08	1	76.4	126	95	1.55	0.81	7.31	0	0	0	1	1	0	3	7	0	1	0	0	0	0	0	1	0
2	0	0	1	0	0	57.07	1	70	160	110	1.51	0.99	5.2	0	0	0	0	1	0	2	7	0	1	0	0	0	0	0	1	0
2	0	0	1	0	0	47.04	1	71	130	82.5	1.86	0.47	6.1	0	0	0	1	1	0	3	7	0	1	0	0	0	0	0	1	0
2	0	0	1	0	0	51	1	83	158	108	1.4	0.99	4.74	1	1	1	0	1	1	5	5	0	1	0	0	1	0	1	0	0
2	0	0	1	0	0	73.03	1	102	210	140	1.64	0.67	4.82	0	0	0	0	1	1	3	3	0	1	0	0	1	0	1	0	0
2	0	0	1	0	0	38.03	1	81	130	80	1.36	1.25	5.51	0	0	0	0	1	1	3	3	0	1	0	0	1	0	1	0	0
1	0	0	1	0	0	38	1	92	144	88	1.45	0.57	4.84	1	1	1	0	1	1	5	5	0	1	0	0	1	0	1	0	0
2	0	0	1	0	0	34	1	96	142	87	0.59	1.72	5.95	1	1	1	1	1	1	6	6	1	0	0	1	0	0	1	0	0
1	0	0	1	0	0	53.11	1	102	131	101	1.01	1.2	4.41	1	0	1	0	1	1	4	4	0	1	0	0	1	0	1	0	0
1	0	0	1	0	0	63.09	1	96	160	100	1.1	1.04	7.49	1	0	0	1	1	1	4	4	0	1	0	0	1	0	1	0	0
2	0	0	1	0	0	52.1	1	80	144	84	1.26	1.4	5.57	1	0	1	0	1	1	4	4	0	1	0	0	1	0	1	0	0
2	0	0	1	0	0	37.03	1	81	130	70	0.74	0.82	4.17	1	0	1	0	1	1	4	4	0	1	0	0	1	0	1	0	0
2	0	0	1	0	0	40.03	1	86	130	80	1.22	1.04	5.06	1	0	1	0	1	1	4	4	0	1	0	0	1	0	1	0	0
2	0	0	1	0	0	37.1	1	105	139	106	0.82	1.18	4.15	1	0	1	0	1	1	4	4	0	1	0	0	1	0	1	0	0
2	0	0	1	0	0	46.05	1	85	136	88	1.09	1.02	4.52	1	1	1	0	1	1	5	5	0	1	0	0	1	0	1	0	0
1	0	0	1	0	0	70.07	1	93	130	80	1.74	0.61	5.2	1	1	1	0	1	1	5	5	0	1	0	0	1	0	1	0	0
2	0	0	1	0	0	61.04	1	77	132.5	82.5	1.19	2.69	5.7	1	1	1	1	1	0	5	7	1	0	0	0	0	1	0	1	0
2	0	1	1	1	0	47.05	1	118	130	80	1.03	5.33	15.08	1	1	1	1	1	1	6	6	1	0	0	1	0	0	1	0	0
1	1	0	0	0	0	43.07	1	90.1	132	101	1	3.69	6.71	1	1	1	1	1	1	6	6	1	0	0	1	0	0	1	0	0
2	1	0	0	0	0	46.11	1	100	126	91	1.07	2.08	5.1	1	1	1	0	1	1	5	5	0	1	0	0	1	0	1	0	0
2	1	0	0	0	0	54.07	1	76	160	110	1.04	1.45	5.13	0	0	1	0	1	0	3	7	0	1	0	0	0	0	0	1	0
2	1	0	0	0	0	43.07	1	75.5	137	85	1.8	0.77	5.11	0	0	0	0	1	0	2	7	0	1	0	0	0	0	0	1	0
2	1	0	0	0	0	40.05	1	91.5	136	88	0.99	0.71	5.23	1	0	1	0	1	1	4	4	0	1	0	0	1	0	1	0	0
2	1	0	0	0	0	40.09	1	105	136.5	90	1.43	1.08	4.8	0	0	0	0	1	1	3	3	0	1	0	0	1	0	1	0	0
2	1	0	0	0	1	57.09	1	82	176	73	1.55	1.06	6.26	1	0	0	1	1	1	4	4	0	1	0	0	1	0	1	0	0
2	1	0	0	0	0	44.04	1	105.3	158	110	1.54	0.69	6.32	1	1	1	1	1	1	6	6	1	0	0	1	0	0	1	0	0
2	1	0	0	0	0	53.07	1	76	135	88	1.45	1.03	5.04	0	0	0	0	1	0	2	7	0	1	0	0	0	0	0	1	0
2	1	0	0	0	0	60.03	1	98	156	104	1.89	1.25	5.3	1	1	1	0	1	1	5	5	0	1	0	0	1	0	1	0	0
2	1	0	0	0	1	57.1	1	80	146	86	1.35	1.04	4.75	0	0	0	0	1	1	3	3	0	1	0	0	1	0	1	0	0
2	1	0	0	0	1	67.09	1	102	153.5	99	0.84	1.01	7.46	1	0	1	1	1	1	5	5	0	1	0	0	1	0	1	0	0
2	1	0	0	0	0	64.03	1	83	169	107	1.53	0.99	5.65	1	0	0	1	1	1	4	4	0	1	0	0	1	0	1	0	0
1	1	0	0	0	0	72.04	1	98	188	108	1.25	1.43	5	0	0	0	0	1	1	3	3	0	1	0	0	1	0	1	0	0
2	1	0	0	0	0	51.09	1	87	180	80	1.67	0.95	6.05	1	0	0	1	1	1	4	4	0	1	0	0	1	0	1	0	0
2	1	0	0	0	0	59.1	1	94	134	84	1.12	2.59	5.6	1	1	1	1	1	1	6	6	1	0	0	1	0	0	1	0	0
2	1	0	0	0	0	61.04	1	64	127	91	1.52	1.64	7.76	0	0	0	1	1	0	3	7	0	1	0	0	0	0	0	1	0
2	1	0	0	0	0	58.07	1	63	135	90	0.72	1.5	5.4	0	0	1	0	1	0	3	7	0	1	0	0	0	0	0	1	0
2	1	0	0	0	0	50.04	1	72	167	90	0.94	2.39	6.73	1	1	1	1	1	0	5	7	1	0	0	0	0	1	0	1	0
1	1	0	0	0	0	56.09	1	80	136	80	0.79	1.41	5.02	0	0	1	0	1	0	3	7	0	1	0	0	0	0	0	1	0
2	1	0	0	0	0	53.11	1	76	158	100	1.31	0.94	4.83	0	0	0	0	1	0	2	7	0	1	0	0	0	0	0	1	0
2	1	0	0	0	0	45.08	1	96	141	90	0.95	0.85	4.14	1	0	1	0	1	1	4	4	0	1	0	0	1	0	1	0	0
2	1	0	0	0	0	75.06	1	86	152	83	2.49	1.42	4.3	0	0	0	0	1	1	3	3	0	1	0	0	1	0	1	0	0
1	1	0	0	0	0	39.01	1	80	123	103	1.19	1.04	4.75	0	0	0	0	1	0	2	7	0	1	0	0	0	0	0	1	0
2	1	0	0	0	0	55.06	1	75.1	148	89	1.57	1.96	5.12	0	1	0	0	1	0	3	7	0	1	0	0	0	0	0	1	0
2	1	0	0	0	0	49.03	1	76	123	85	1.59	0.52	5.3	0	0	0	0	1	0	2	7	0	1	0	0	0	0	0	1	0
1	1	0	0	0	0	49	1	84	140	100	1.25	2.7	4.96	0	1	0	0	1	0	3	7	0	1	0	0	0	0	0	1	0
2	1	0	0	0	1	48.07	1	74	144	90	1.69	1.27	6	1	1	1	1	1	0	5	7	1	0	0	0	0	1	0	1	0
1	1	0	0	0	0	66.06	1	98	190	106	0.89	2.71	6.45	1	1	1	1	1	1	6	6	1	0	0	1	0	0	1	0	0
2	1	0	0	0	0	50.06	1	84	140	120	1.29	2.88	6.13	1	1	1	1	1	1	6	6	1	0	0	1	0	0	1	0	0
1	1	0	0	0	0	40.07	1	77	130	82	0.88	1.15	5.59	0	0	1	0	1	0	3	7	0	1	0	0	0	0	0	1	0
1	1	1	0	0	0	53.11	1	108	158	119	1.23	1.75	5.23	1	1	0	0	1	1	4	4	0	1	0	0	1	0	1	0	0
1	1	1	0	0	0	47.02	1	78	146	108	1.55	1.01	3.45	0	0	0	0	1	0	2	7	0	1	0	0	0	0	0	1	0
1	1	1	0	0	0	47.07	1	79	169	112	2.98	1.07	3.99	0	0	0	0	1	0	2	7	0	1	0	0	0	0	0	1	0
1	1	1	0	0	1	42.52	1	86	130	80	1.4	0.89	3.92	0	0	0	0	1	0	2	7	0	1	0	0	0	0	0	1	0
1	1	1	0	0	0	39.06	1	104.1	149	91	1.34	0.59	5.55	0	0	0	0	1	1	3	3	0	1	0	0	1	0	1	0	0
1	1	1	0	0	1	48.06	1	90.4	158	88	2.45	1.56	5.4	0	0	0	0	1	1	3	3	0	1	0	0	1	0	1	0	0
1	1	1	0	0	0	61.05	1	94	173	83	1.14	0.57	5.2	1	1	1	0	1	1	5	5	0	1	0	0	1	0	1	0	0
1	1	1	0	0	1	55	1	85	164	100	1.79	1.45	5.27	0	0	0	0	1	0	2	7	0	1	0	0	0	0	0	1	0
1	1	1	0	0	0	51.07	1	100	175.5	90	1.65	3.45	8.8	1	1	1	1	1	1	6	6	1	0	0	1	0	0	1	0	0
1	1	1	0	0	0	63.09	1	93	155	95	1.68	0.81	5.2	0	0	0	0	1	1	3	3	0	1	0	0	1	0	1	0	0
1	1	1	0	0	0	31.09	1	71	130	58	1.39	1.31	5.32	0	0	0	0	1	0	2	7	0	1	0	0	0	0	0	1	0
1	1	1	0	0	1	55.06	1	84	130	84	1.09	0.83	5.68	0	0	0	1	1	0	3	7	0	1	0	0	0	0	0	1	0
1	1	1	0	0	0	68	1	82	130	100	1.43	0.93	5.51	1	1	1	0	1	0	4	7	0	1	0	0	0	0	0	1	0
1	1	1	0	0	0	47.08	1	102	140	100	1.1	5.02	7.4	1	1	1	1	1	1	6	6	1	0	0	1	0	0	1	0	0
1	0	0	0	0	0	42.08	1	102.5	130	80	1.35	1.74	5.38	1	1	0	0	1	1	4	4	0	1	0	0	1	0	1	0	0
2	0	0	0	0	0	53.11	1	96	125	85	1.99	1.98	5.69	1	1	0	1	1	1	5	5	0	1	0	0	1	0	1	0	0
1	0	0	0	0	0	80.03	1	75	150	110	1.41	0.88	4.69	0	0	0	0	1	0	2	7	0	1	0	0	0	0	0	1	0
1	0	0	0	0	0	61.08	1	88	164	96	1.4	0.68	7.42	0	0	0	1	1	0	3	7	0	1	0	0	0	0	0	1	0
2	0	0	0	0	0	43.01	1	72	179	110	0.94	0.61	3.65	0	0	1	0	1	0	3	7	0	1	0	0	0	0	0	1	0
2	0	0	0	0	0	43.11	1	76	130	80	1.08	1.45	4.12	0	0	1	0	1	0	3	7	0	1	0	0	0	0	0	1	0
2	0	0	0	0	0	39	1	67	180	110	1.39	1	4.67	0	0	0	0	1	0	2	7	0	1	0	0	0	0	0	1	0
2	0	0	0	0	0	39.04	1	75	147	80	1.64	0.79	4.7	0	0	0	0	1	0	2	7	0	1	0	0	0	0	0	1	0
1	0	0	0	0	0	55	1	103.1	172	98	1.77	0.68	5.55	0	0	0	0	1	1	3	3	0	1	0	0	1	0	1	0	0
2	0	0	0	0	0	44.07	1	86	144	84	1.87	0.61	4.55	0	0	0	0	1	1	3	3	0	1	0	0	1	0	1	0	0
2	0	0	0	0	0	51.08	1	108	200	110	1.33	0.7	5.07	0	0	0	0	1	1	3	3	0	1	0	0	1	0	1	0	0
2	0	0	0	0	0	49.11	1	82	135	100	2.81	0.53	5.2	0	0	0	0	1	1	3	3	0	1	0	0	1	0	1	0	0
2	0	0	0	0	0	35.09	1	80	133	102	1.73	0.69	4.36	0	0	0	0	1	1	3	3	0	1	0	0	1	0	1	0	0
2	0	0	0	0	0	32.03	1	89	140	90	1.77	1.14	3.72	0	0	0	0	1	1	3	3	0	1	0	0	1	0	1	0	0
1	0	0	0	0	1	47.08	1	98	123	87	1.91	1.55	8.24	1	0	0	1	1	1	4	4	0	1	0	0	1	0	1	0	0
2	0	0	0	0	1	40.1	1	81	147	105	1.4	0.94	4.75	0	0	0	0	1	1	3	3	0	1	0	0	1	0	1	0	0
2	0	0	0	0	0	53.11	1	100	131	85	1.47	1	6	1	1	1	1	1	1	6	6	1	0	0	1	0	0	1	0	0
1	0	0	0	0	0	76.07	1	120.1	185	110	1.68	0.76	26.8	1	0	0	1	1	1	4	4	0	1	0	0	1	0	1	0	0
1	0	0	0	0	0	35.08	1	96.4	130	89	0.91	4.54	6.05	1	1	1	1	1	1	6	6	1	0	0	1	0	0	1	0	0
2	0	0	0	0	0	53.02	1	66.1	136	90	2.83	0.66	5	0	0	0	0	1	0	2	7	0	1	0	0	0	0	0	1	0
1	0	0	0	0	0	67.09	1	94	132.5	87.5	1.56	0.84	5.6	1	0	0	1	1	1	4	4	0	1	0	0	1	0	1	0	0
1	0	0	0	0	0	70.06	1	110	161	91	0.91	2.58	5.3	1	1	1	0	1	1	5	5	0	1	0	0	1	0	1	0	0
2	0	0	0	0	0	37.04	1	95	126	90	0.75	0.81	5.08	1	0	1	0	1	1	4	4	0	1	0	0	1	0	1	0	0
1	0	0	0	0	1	67.02	1	135	191	119	1.38	1.85	6.83	1	1	0	1	1	1	5	5	0	1	0	0	1	0	1	0	0
2	0	0	0	0	0	64.1	1	86	185	105	2.02	0.86	4.3	0	0	0	0	1	1	3	3	0	1	0	0	1	0	1	0	0
2	0	0	0	0	0	62.05	1	103	157	92	1.41	1.87	5.47	1	1	0	0	1	1	4	4	0	1	0	0	1	0	1	0	0
2	0	0	0	0	0	47.11	1	89	109	85	0.92	1.38	5.58	1	0	1	0	1	1	4	4	0	1	0	0	1	0	1	0	0
1	0	0	0	0	0	76.09	1	75	128	88	1.68	0.68	4.62	0	0	0	0	1	0	2	7	0	1	0	0	0	0	0	1	0
1	0	0	0	0	0	57.06	1	98	140	81	1.98	4.77	6.33	1	1	0	1	1	1	5	5	0	1	0	0	1	0	1	0	0
2	0	0	0	0	0	56.1	1	82	160	100	1.94	1.12	5.22	1	1	1	0	1	1	5	5	0	1	0	0	1	0	1	0	0
2	0	0	0	0	0	32.05	1	87	140	90	1.32	0.92	3.72	1	1	1	0	1	1	5	5	0	1	0	0	1	0	1	0	0
2	0	0	0	0	0	45.09	1	98	130	80	0.74	1.96	4.03	1	1	1	0	1	1	5	5	0	1	0	0	1	0	1	0	0
1	0	0	0	0	1	56.05	1	92	162	98	0.96	1.64	5.26	1	1	1	0	1	1	5	5	0	1	0	0	1	0	1	0	0
2	0	0	0	0	0	69.03	1	104	140	94	1.06	3.83	7.06	1	1	1	1	1	1	6	6	1	0	0	1	0	0	1	0	0
2	0	0	0	0	0	48.11	1	82	138	88	1.01	2.19	6.53	1	1	1	1	1	1	6	6	1	0	0	1	0	0	1	0	0
1	0	0	0	0	0	55.08	1	84	138	78	1.29	1.43	5.97	0	0	0	1	1	0	3	7	0	1	0	0	0	0	0	1	0
2	0	0	0	0	0	43	1	78	140	70	1.56	0.83	5.82	0	0	0	1	1	0	3	7	0	1	0	0	0	0	0	1	0
2	0	0	0	1	0	48.07	1	82	140	80	1.68	0.9	5.77	1	0	0	1	1	1	4	4	0	1	0	0	1	0	1	0	0
2	0	0	0	0	0	43.02	1	92	130	88	1.2	0.83	3.93	1	0	1	0	1	1	4	4	0	1	0	0	1	0	1	0	0
2	0	0	0	0	0	42.05	1	89	130	80	1.35	0.7	3.55	0	0	0	0	1	1	3	3	0	1	0	0	1	0	1	0	0
2	0	0	0	0	0	44.03	1	115	180	120	1.18	1.14	6.7	1	0	1	1	1	1	5	5	0	1	0	0	1	0	1	0	0
2	0	0	0	0	0	34.09	1	85	130	80	1.28	1.24	6.26	1	0	1	1	1	1	5	5	0	1	0	0	1	0	1	0	0
2	0	0	0	0	0	45.11	1	83	130	80	2.17	0.96	5.8	1	0	0	1	1	1	4	4	0	1	0	0	1	0	1	0	0
2	0	0	0	0	0	77.02	1	98	130	79	1.87	1.09	6.7	1	1	1	1	1	1	6	6	1	0	0	1	0	0	1	0	0
1	0	0	0	0	1	62.02	1	84	152	87	1.59	1.06	5	0	0	0	0	1	0	2	7	0	1	0	0	0	0	0	1	0
2	0	0	0	0	0	47.11	1	98	121	86.5	1.48	1.69	5.7	1	1	1	1	1	1	6	6	1	0	0	1	0	0	1	0	0
1	0	0	0	0	0	59.08	1	74	162	94	1.58	1.65	5.6	0	0	0	1	1	0	3	7	0	1	0	0	0	0	0	1	0
2	0	0	0	0	1	80.09	1	97	135	72.5	0.95	0.8	5.4	1	0	1	0	1	1	4	4	0	1	0	0	1	0	1	0	0
2	0	0	0	0	0	64.09	1	75	170	105	1.67	1.36	10.9	0	0	0	1	1	0	3	7	0	1	0	0	0	0	0	1	0
1	0	0	0	0	0	49.09	1	106	160	110	1.52	1.67	6	1	0	0	1	1	1	4	4	0	1	0	0	1	0	1	0	0
2	0	0	0	0	0	73.02	1	99	141	91	1.56	0.77	5.1	0	0	0	0	1	1	3	3	0	1	0	0	1	0	1	0	0
2	0	0	0	0	0	55.05	1	90	138	88	1.01	2.83	7.75	1	1	1	1	1	1	6	6	1	0	0	1	0	0	1	0	0
2	0	0	0	0	0	55.08	1	59	186	102	1.31	1.27	6.56	0	0	0	1	1	0	3	7	0	1	0	0	0	0	0	1	0
2	0	0	0	0	0	49.06	1	83	130	83	1.22	0.95	4.53	1	0	1	0	1	1	4	4	0	1	0	0	1	0	1	0	0
2	0	0	0	0	0	46.1	1	96	154	95	1.05	0.59	4.87	1	1	1	0	1	1	5	5	0	1	0	0	1	0	1	0	0
2	0	0	0	0	0	79.06	1	83	121	97	2.11	0.76	5.2	0	0	0	0	1	1	3	3	0	1	0	0	1	0	1	0	0
2	0	0	0	0	0	45.05	1	90	130	84	2.06	0.76	6.2	1	0	0	1	1	1	4	4	0	1	0	0	1	0	1	0	0
1	0	0	0	0	0	36.09	1	86	130	84	1.6	3.93	4.06	0	1	0	0	1	0	3	7	0	1	0	0	0	0	0	1	0
1	0	0	0	0	0	69.07	1	92	160	110	1.15	0.57	7.45	1	1	1	1	1	1	6	6	1	0	0	1	0	0	1	0	0
2	0	0	0	0	0	48.07	1	77	150	90	1.16	1.15	4.89	0	0	1	0	1	0	3	7	0	1	0	0	0	0	0	1	0
2	0	0	0	0	0	65.1	1	89	180	120	1.72	0.78	5.11	0	0	0	0	1	1	3	3	0	1	0	0	1	0	1	0	0
2	0	0	0	0	0	53.02	1	81	130	80	1.41	1.42	6.59	1	0	0	1	1	1	4	4	0	1	0	0	1	0	1	0	0
2	0	0	0	0	0	57.08	1	76.2	119	91	1.6	0.89	5.9	0	0	0	1	1	0	3	7	0	1	0	0	0	0	0	1	0
2	0	0	0	0	0	27	1	100	137	85	2.03	0.56	4.97	0	0	0	0	1	1	3	3	0	1	0	0	1	0	1	0	0
2	0	0	0	0	0	57	1	88	138	88	0.99	1.12	3.71	1	0	1	0	1	1	4	4	0	1	0	0	1	0	1	0	0
1	0	0	0	0	0	55.11	1	106	130	80	1.02	2.25	5.75	1	1	1	1	1	1	6	6	1	0	0	1	0	0	1	0	0
1	0	0	0	0	0	80	1	89	121	90	1.62	0.68	5.89	0	0	0	1	1	0	3	7	0	1	0	0	0	0	0	1	0
2	0	0	0	0	0	26.04	1	96	130	80	1.31	1.05	5.51	0	0	0	0	1	1	3	3	0	1	0	0	1	0	1	0	0
1	0	0	0	0	0	25.08	1	96	144	88	1.13	1.66	4.73	0	0	0	0	1	1	3	3	0	1	0	0	1	0	1	0	0
2	0	0	0	0	0	85	1	92	130	80	1.19	1.51	5.92	1	0	1	1	1	1	5	5	0	1	0	0	1	0	1	0	0
2	0	0	0	0	0	40.08	1	73	140	90	1.65	0.93	5.24	0	0	0	0	1	0	2	7	0	1	0	0	0	0	0	1	0
2	0	1	0	0	0	37.03	1	82.6	137	90	1.4	1.01	4.15	1	1	1	0	1	1	5	5	0	1	0	0	1	0	1	0	0
1	0	1	0	0	0	54.07	1	97	160	108	1.53	1	5.61	1	0	0	1	1	1	4	4	0	1	0	0	1	0	1	0	0
1	0	1	0	0	0	70.07	1	84.4	157	94	1.43	0.74	6.2	0	0	0	1	1	0	3	7	0	1	0	0	0	0	0	1	0
1	1	0	1	0	0	28.09	0	88	124	80	0.96	0.85	4.87	0	0	1	0	0	0	7	7	0	0	0	0	0	0	0	0	0
1	1	0	1	0	0	26.11	0	73	124	82	0.78	0.58	4.02	0	0	1	0	0	0	7	7	0	0	0	0	0	0	0	0	0
1	1	0	1	0	0	32.07	0	84	117	67	2.1	1.14	4.86	0	0	0	0	0	0	1	1	0	0	0	0	0	0	0	0	0
1	1	0	1	0	0	35.08	0	75	120	76	1.59	0.35	5.28	0	0	0	0	0	0	1	1	0	0	0	0	0	0	0	0	0
1	1	0	1	0	0	28.07	0	74	108	68	1.44	0.67	4.16	0	0	0	0	0	0	1	1	0	0	0	0	0	0	0	0	0
1	1	0	1	0	0	31.02	0	72	124	80	1.53	1.28	4.82	0	0	0	0	0	0	1	1	0	0	0	0	0	0	0	0	0
1	1	0	1	0	0	38.07	0	75	117	79	1.74	0.36	4.66	0	0	0	0	0	0	1	1	0	0	0	0	0	0	0	0	0
1	1	0	1	0	0	40.09	0	81	128	80	2.01	0.68	7.1	0	0	0	1	0	0	7	7	0	0	0	0	0	0	0	0	0
1	1	0	1	0	0	55.09	0	78	120	70	1.16	0.66	7.06	0	0	0	1	0	0	7	7	0	0	0	0	0	0	0	0	0
1	1	0	1	0	0	53.04	0	78	120	80	1.71	0.07	5.74	0	0	0	1	0	0	7	7	0	0	0	0	0	0	0	0	0
1	1	0	1	0	0	39.05	0	83	112	69	1.4	0.59	6.1	0	0	0	1	0	0	7	7	0	0	0	0	0	0	0	0	0
1	1	0	1	0	0	46.08	0	85	107	78	1.08	1.56	6.9	0	0	0	1	0	0	7	7	0	0	0	0	0	0	0	0	0
1	1	0	1	0	0	37.08	0	82	109	70	1.07	1.7	4.8	0	1	0	0	0	0	7	7	0	0	0	0	0	0	0	0	0
1	1	0	1	0	0	49.02	0	82	121	79	1.07	1.93	5.53	0	1	0	0	0	0	7	7	0	0	0	0	0	0	0	0	0
2	1	0	1	0	0	27.02	0	72	84	60	0.96	0.72	3.24	0	0	1	0	0	0	7	7	0	0	0	0	0	0	0	0	0
1	1	0	1	0	1	40.03	0	75	120	80	0.88	0.69	4.27	0	0	1	0	0	0	7	7	0	0	0	0	0	0	0	0	0
2	1	0	1	0	0	43.04	0	70.2	107	69	1.66	0.94	5.3	0	0	0	0	0	0	1	1	0	0	0	0	0	0	0	0	0
2	1	0	1	0	0	49.02	0	65	85	64	1.53	1.14	5.15	0	0	0	0	0	0	1	1	0	0	0	0	0	0	0	0	0
2	1	0	1	0	0	53.11	0	74	120	80	1.79	0.52	5.44	0	0	0	0	0	0	1	1	0	0	0	0	0	0	0	0	0
1	1	0	1	0	1	32.06	0	75	129	70	1.95	0.58	5.3	0	0	0	0	0	0	1	1	0	0	0	0	0	0	0	0	0
1	1	0	1	0	1	28.02	0	77	127.5	69	1.44	1.28	4.8	0	0	0	0	0	0	1	1	0	0	0	0	0	0	0	0	0
1	1	0	1	0	0	48.04	0	82	129	79	1.43	2.52	9.18	0	1	0	1	0	0	7	7	0	0	0	0	0	0	0	0	0
2	1	0	1	0	0	46.07	0	72	129	61	1.27	1.52	5.7	0	0	1	1	0	0	7	7	0	0	0	0	0	0	0	0	0
2	1	0	1	0	0	61.06	0	74	110	70	1.18	1	5.75	0	0	1	1	0	0	7	7	0	0	0	0	0	0	0	0	0
2	1	0	1	0	0	42.05	0	71	109	70	1.21	0.8	4.6	0	1	1	0	0	0	7	7	0	0	0	0	0	0	0	0	0
2	1	0	1	0	1	53.09	0	74.2	122	68	1.26	0.94	5.27	0	0	1	0	0	0	7	7	0	0	0	0	0	0	0	0	0
1	1	0	1	0	0	41.04	0	95	123	80	1.4	1.04	5.4	0	0	0	0	0	1	7	2	0	0	0	0	1	0	0	0	1
1	1	0	1	0	0	53.08	0	106	110	84.5	1.13	1.31	4.6	0	0	0	0	0	1	7	2	0	0	0	0	1	0	0	0	1
1	1	0	1	0	0	35.01	0	95	128	72	1.22	0.55	5.35	0	0	0	0	0	1	7	2	0	0	0	0	1	0	0	0	1
2	1	0	1	0	1	44.03	0	66	115	72	1.39	0.67	5.87	0	0	0	1	0	0	7	7	0	0	0	0	0	0	0	0	0
2	1	0	1	0	0	39.01	0	84	120	80	0.86	1.25	4.9	0	0	1	0	0	1	7	3	0	0	0	0	1	0	0	0	1
2	1	0	1	0	0	49.1	0	88.4	109	69	1.29	0.98	5.02	0	0	1	0	0	1	7	3	0	0	0	0	1	0	0	0	1
2	1	0	1	0	0	41.01	0	84	128	76	1.83	1.18	4.61	0	0	0	0	0	1	7	2	0	0	0	0	1	0	0	0	1
2	1	0	1	0	0	48.02	0	86	121	74	1.39	0.52	5.4	0	0	0	0	0	1	7	2	0	0	0	0	1	0	0	0	1
2	1	0	1	0	0	42.02	0	81	119	79	1.49	1.04	5.71	0	0	0	1	0	1	7	3	0	0	0	0	1	0	0	0	1
1	1	0	1	0	0	32.04	0	81	110	70	0.99	0.71	4.77	0	0	1	0	0	0	7	7	0	0	0	0	0	0	0	0	0
1	1	0	1	0	0	28.04	0	76	80	50	0.83	1.16	4.35	0	0	1	0	0	0	7	7	0	0	0	0	0	0	0	0	0
1	1	0	1	0	0	33	0	79	110	72	0.85	1.12	4.44	0	0	1	0	0	0	7	7	0	0	0	0	0	0	0	0	0
1	1	0	1	0	0	25	0	72	120	70	0.83	0.67	4.65	0	0	1	0	0	0	7	7	0	0	0	0	0	0	0	0	0
1	1	0	1	0	0	35.08	0	88	120	70	0.8	1.47	4.57	0	0	1	0	0	0	7	7	0	0	0	0	0	0	0	0	0
1	1	0	1	0	0	32	0	88	119	70	0.96	0.03	4.71	0	0	1	0	0	0	7	7	0	0	0	0	0	0	0	0	0
1	1	0	1	0	0	29.05	0	76	100	70	1.32	0.61	3.89	0	0	0	0	0	0	1	1	0	0	0	0	0	0	0	0	0
1	1	0	1	0	0	31.02	0	66	100	70	1.43	1.27	5.23	0	0	0	0	0	0	1	1	0	0	0	0	0	0	0	0	0
1	1	0	1	0	0	40	0	72	102	70	1.42	0.42	4.58	0	0	0	0	0	0	1	1	0	0	0	0	0	0	0	0	0
1	1	0	1	0	0	52	0	81	120	70	1.36	1.06	5.52	0	0	0	0	0	0	1	1	0	0	0	0	0	0	0	0	0
1	1	0	1	0	0	27.08	0	76	90	60	1.21	1.49	4.07	0	0	0	0	0	0	1	1	0	0	0	0	0	0	0	0	0
1	1	0	1	0	0	33	0	77	120	84	0.85	1.6	5.69	0	0	1	1	0	0	7	7	0	0	0	0	0	0	0	0	0
1	1	0	1	0	0	34.11	0	81	120	80	1.18	1.24	6.24	0	0	0	1	0	0	7	7	0	0	0	0	0	0	0	0	0
1	1	0	1	0	0	23	0	71	110	70	0.79	7	4.98	0	1	1	0	0	0	7	7	0	0	0	0	0	0	0	0	0
1	1	0	1	0	0	25	0	76	120	70	1.01	6.4	4.15	0	1	1	0	0	0	7	7	0	0	0	0	0	0	0	0	0
1	1	0	1	0	0	26.02	0	81	120	80	1.38	2.17	5.06	0	1	0	0	0	0	7	7	0	0	0	0	0	0	0	0	0
1	1	0	1	0	0	33	0	83	124	84	1.23	3.7	4.33	0	1	0	0	0	0	7	7	0	0	0	0	0	0	0	0	0
1	1	0	1	0	1	31	0	80	110	80	1.04	1.08	3.85	0	0	0	0	0	0	1	1	0	0	0	0	0	0	0	0	0
1	1	0	1	0	0	44.02	0	91	120	84	1.02	0.98	5.46	0	0	1	0	0	1	7	3	0	0	0	0	1	0	0	0	1
1	1	0	1	0	0	43.03	0	91	110	80	1.03	1.33	5.2	0	0	1	0	0	1	7	3	0	0	0	0	1	0	0	0	1
1	1	0	1	0	0	42.02	0	95	120	80	1.69	1.31	5.02	0	0	0	0	0	1	7	2	0	0	0	0	1	0	0	0	1
1	1	0	1	0	0	45.05	0	98	120	70	1.22	0.64	3.52	0	0	0	0	0	1	7	2	0	0	0	0	1	0	0	0	1
1	1	0	1	0	0	30.07	0	94	110	80	1.24	0.89	5.88	0	0	0	1	0	1	7	3	0	0	0	0	1	0	0	0	1
1	1	0	1	0	0	43	0	114	120	84	0.78	1.84	2.61	1	1	1	0	0	1	7	4	0	0	0	0	1	0	0	0	1
1	1	0	1	0	0	32.1	0	96	114	70	1.11	2.66	4.26	0	1	0	0	0	1	7	3	0	0	0	0	1	0	0	0	1
2	1	0	1	0	0	62	0	80	110	80	1.26	0.64	4.09	0	0	1	0	0	1	7	3	0	0	0	0	1	0	0	0	1
2	1	0	1	0	0	41	0	83	110	70	1.21	1.22	4.14	0	0	1	0	0	1	7	3	0	0	0	0	1	0	0	0	1
2	1	0	1	0	0	43.05	0	108	120	84	0.75	0.83	5.17	0	0	1	0	0	1	7	3	0	0	0	0	1	0	0	0	1
1	1	0	1	0	0	32	0	93	120	70	1.05	9.2	6.28	1	1	0	1	0	1	7	4	0	0	0	0	1	0	0	0	1
2	1	0	1	0	0	51	0	101	120	80	1.11	0.73	5.82	1	0	1	1	0	1	7	4	0	0	0	0	1	0	0	0	1
2	1	0	1	0	0	42.02	0	81	110	80	0.65	0.68	4.64	1	1	1	0	0	1	7	4	0	0	0	0	1	0	0	0	1
1	1	1	1	0	0	30.1	0	84	128	79	1.43	0.27	4.69	0	0	0	0	0	0	1	1	0	0	0	0	0	0	0	0	0
1	1	1	1	0	0	31.07	0	75	120	78	1.26	0.49	4.04	0	0	0	0	0	0	1	1	0	0	0	0	0	0	0	0	0
1	1	1	1	0	0	33.11	0	77	111	71	1.12	0.58	3.82	0	0	0	0	0	0	1	1	0	0	0	0	0	0	0	0	0
1	1	1	1	0	0	37.09	0	80	120	67	1.24	0.88	4.2	0	0	0	0	0	0	1	1	0	0	0	0	0	0	0	0	0
2	1	1	1	0	0	36.11	0	77	115	65	1.55	0.7	5.38	0	0	0	0	0	0	1	1	0	0	0	0	0	0	0	0	0
1	1	1	1	0	1	59.09	0	83	120	78	1.4	0.6	4.75	0	0	0	0	0	0	1	1	0	0	0	0	0	0	0	0	0
1	1	1	1	0	0	43.1	0	92	120	79	1.83	1.09	4.5	0	0	0	0	0	1	7	2	0	0	0	0	1	0	0	0	1
1	1	1	1	0	0	38	0	91.6	119	83	1.24	1.1	5.3	0	0	0	0	0	1	7	2	0	0	0	0	1	0	0	0	1
1	1	1	1	0	0	43.05	0	98	120	82	1.45	0.8	4.61	0	0	0	0	0	1	7	2	0	0	0	0	1	0	0	0	1
1	1	1	1	0	0	34.01	0	93	120	70	1.11	1.44	6.26	0	0	0	1	0	1	7	3	0	0	0	0	1	0	0	0	1
1	1	1	1	0	0	31.11	0	91.2	119	71	1.15	1.16	6.54	0	0	0	1	0	1	7	3	0	0	0	0	1	0	0	0	1
1	1	1	1	0	0	36.03	0	95	124	84	0.45	1.96	5.55	1	1	1	0	0	1	7	4	0	0	0	0	1	0	0	0	1
1	1	1	1	0	0	38	0	76	118	79	1.59	0.65	5.51	0	0	0	0	0	0	1	1	0	0	0	0	0	0	0	0	0
1	1	1	1	0	0	58.11	0	73	106	70	2.17	0.83	5.24	0	0	0	0	0	0	1	1	0	0	0	0	0	0	0	0	0
1	1	1	1	0	0	32.05	0	73	120	60	1.4	0.74	2.86	0	0	0	0	0	0	1	1	0	0	0	0	0	0	0	0	0
1	1	1	1	0	0	50.07	0	80	110	70	1.3	1.32	5.52	0	0	0	0	0	0	1	1	0	0	0	0	0	0	0	0	0
1	1	1	1	0	0	40	0	72	120	70	1.09	0.67	5.17	0	0	0	0	0	0	1	1	0	0	0	0	0	0	0	0	0
1	1	1	1	0	0	37.04	0	77	120	69	0.77	1.11	5.62	0	0	1	1	0	0	7	7	0	0	0	0	0	0	0	0	0
1	1	1	1	0	0	37.09	0	82	110	70	1.23	0.46	6.32	0	0	0	1	0	0	7	7	0	0	0	0	0	0	0	0	0
1	1	1	1	0	0	35	0	82	120	80	1.08	0.96	6.34	0	0	0	1	0	0	7	7	0	0	0	0	0	0	0	0	0
1	1	1	1	0	1	31	0	74	116	64	1.24	1.9	4.04	0	1	0	0	0	0	7	7	0	0	0	0	0	0	0	0	0
1	1	1	1	0	0	45.04	0	90	112	60	1.11	0.85	6.02	0	0	0	1	0	1	7	3	0	0	0	0	1	0	0	0	1
1	1	1	1	0	1	40.03	0	90	120	80	1.22	0.4	4.76	0	0	0	0	0	1	7	2	0	0	0	0	1	0	0	0	1
1	0	0	1	0	0	32.1	0	87	115	77.5	0.82	1.53	4.7	0	0	1	0	0	0	7	7	0	0	0	0	0	0	0	0	0
1	0	0	1	0	0	31.07	0	84	118	70	0.99	1.41	4.95	0	0	1	0	0	0	7	7	0	0	0	0	0	0	0	0	0
1	0	0	1	0	0	33.04	0	80	128	70	0.99	1.19	4.92	0	0	1	0	0	0	7	7	0	0	0	0	0	0	0	0	0
2	0	0	1	1	0	32.11	0	67	118	68	0.68	1.1	3.95	0	0	1	0	0	0	7	7	0	0	0	0	0	0	0	0	0
1	0	0	1	0	0	26.11	0	76	113	80	1.63	0.56	3.59	0	0	0	0	0	0	1	1	0	0	0	0	0	0	0	0	0
1	0	0	1	0	0	29.04	0	80	109	77	1.68	0.53	5.3	0	0	0	0	0	0	1	1	0	0	0	0	0	0	0	0	0
1	0	0	1	0	0	32.06	0	73	97	59	1.77	1.12	5.42	0	0	0	0	0	0	1	1	0	0	0	0	0	0	0	0	0
1	0	0	1	0	0	38.05	0	76	103	69	1.85	0.35	4.36	0	0	0	0	0	0	1	1	0	0	0	0	0	0	0	0	0
1	0	0	1	0	0	23.08	0	79	118	78	1.41	0.35	3.65	0	0	0	0	0	0	1	1	0	0	0	0	0	0	0	0	0
1	0	0	1	0	0	28.07	0	72	122	68	1.24	1.34	4.15	0	0	0	0	0	0	1	1	0	0	0	0	0	0	0	0	0
1	0	0	1	0	0	24.04	0	79	124	80	1.13	1.03	4.48	0	0	0	0	0	0	1	1	0	0	0	0	0	0	0	0	0
1	0	0	1	0	0	22.05	0	73	100	60	1.63	1.06	4.81	0	0	0	0	0	0	1	1	0	0	0	0	0	0	0	0	0
1	0	0	1	0	0	26.03	0	74	98	68	2.14	0.61	3.77	0	0	0	0	0	0	1	1	0	0	0	0	0	0	0	0	0
1	0	0	1	0	0	33.03	0	72	111	67	2.5	0.87	4.85	0	0	0	0	0	0	1	1	0	0	0	0	0	0	0	0	0
1	0	0	1	0	0	46.04	0	78	114	67	2.09	0.83	5.13	0	0	0	0	0	0	1	1	0	0	0	0	0	0	0	0	0
1	0	0	1	0	0	30.07	0	78	113	80	1.35	0.48	7.32	0	0	0	1	0	0	7	7	0	0	0	0	0	0	0	0	0
1	0	0	1	0	0	27.04	0	84	108	68	1.23	0.69	7.54	0	0	0	1	0	0	7	7	0	0	0	0	0	0	0	0	0
1	0	0	1	0	0	36.08	0	80	119	80	1.23	1.64	7.74	0	0	0	1	0	0	7	7	0	0	0	0	0	0	0	0	0
1	0	0	1	0	0	24.06	0	81	120	60	2.01	0.69	6	0	0	0	1	0	0	7	7	0	0	0	0	0	0	0	0	0
2	0	0	1	1	0	26.03	0	76	108	60	2.04	0.67	6.4	0	0	0	1	0	0	7	7	0	0	0	0	0	0	0	0	0
2	0	0	1	0	0	33.02	0	75.4	117	69	1.08	0.44	4.8	0	0	1	0	0	0	7	7	0	0	0	0	0	0	0	0	0
2	0	0	1	0	0	22.02	0	69	110	78	1.29	0.55	4.48	0	0	1	0	0	0	7	7	0	0	0	0	0	0	0	0	0
2	0	0	1	0	0	26.1	0	61	70	40	1.15	0.66	5.02	0	0	1	0	0	0	7	7	0	0	0	0	0	0	0	0	0
2	0	0	1	0	0	29.1	0	72.3	121	69	1.25	0.8	5.15	0	0	1	0	0	0	7	7	0	0	0	0	0	0	0	0	0
2	0	0	1	0	0	27.07	0	67	120	74	1.04	1	4.68	0	0	1	0	0	0	7	7	0	0	0	0	0	0	0	0	0
2	0	0	1	0	0	36.1	0	67	120	79	1.12	1.1	5	0	0	1	0	0	0	7	7	0	0	0	0	0	0	0	0	0
2	0	0	1	0	0	24	0	75	116	82	1.15	0.59	4.45	0	0	1	0	0	0	7	7	0	0	0	0	0	0	0	0	0
2	0	0	1	0	0	27.11	0	79	120	82	1.19	0.57	3.17	0	0	1	0	0	0	7	7	0	0	0	0	0	0	0	0	0
2	0	0	1	0	0	32.11	0	74	112	77	1.02	0.75	5.37	0	0	1	0	0	0	7	7	0	0	0	0	0	0	0	0	0
2	0	0	1	0	0	22.03	0	64	118	76	0.96	0.61	3.91	0	0	1	0	0	0	7	7	0	0	0	0	0	0	0	0	0
2	0	0	1	0	0	39.08	0	68	125	83	1.29	1.25	4.57	0	0	1	0	0	0	7	7	0	0	0	0	0	0	0	0	0
2	0	0	1	0	0	35.06	0	77	127	80	0.84	1.07	3.28	0	0	1	0	0	0	7	7	0	0	0	0	0	0	0	0	0
2	0	0	1	1	1	43.04	0	70	126.5	77	1.13	1.47	4.9	0	0	1	0	0	0	7	7	0	0	0	0	0	0	0	0	0
2	0	0	1	0	0	28	0	64	102	76	1.59	0.43	5.15	0	0	0	0	0	0	1	1	0	0	0	0	0	0	0	0	0
2	0	0	1	0	0	32.02	0	63	119	79	1.6	0.48	3.61	0	0	0	0	0	0	1	1	0	0	0	0	0	0	0	0	0
2	0	0	1	0	0	32.11	0	70	120	78	2.91	1.68	4.18	0	0	0	0	0	0	1	1	0	0	0	0	0	0	0	0	0
2	0	0	1	0	0	35.08	0	70	110	70	1.75	0.46	5.5	0	0	0	0	0	0	1	1	0	0	0	0	0	0	0	0	0
2	0	0	1	0	0	37.07	0	70	122	79	1.6	0.46	4.5	0	0	0	0	0	0	1	1	0	0	0	0	0	0	0	0	0
2	0	0	1	0	0	35.08	0	79.5	115	71	1.57	1.3	4.79	0	0	0	0	0	0	1	1	0	0	0	0	0	0	0	0	0
2	0	0	1	0	0	43.04	0	66	110	62	2.3	1.24	3.65	0	0	0	0	0	0	1	1	0	0	0	0	0	0	0	0	0
2	0	0	1	0	0	45.11	0	66	113	72.5	1.79	1.16	5.44	0	0	0	0	0	0	1	1	0	0	0	0	0	0	0	0	0
2	0	0	1	0	0	55.02	0	79	110	70	1.58	0.99	5.22	0	0	0	0	0	0	1	1	0	0	0	0	0	0	0	0	0
2	0	0	1	0	0	23.08	0	68.5	117	76	1.54	0.46	5.2	0	0	0	0	0	0	1	1	0	0	0	0	0	0	0	0	0
2	0	0	1	0	0	24.1	0	72	118	67	1.41	0.48	4.87	0	0	0	0	0	0	1	1	0	0	0	0	0	0	0	0	0
2	0	0	1	0	0	20.01	0	78	125	80	1.66	1.23	5	0	0	0	0	0	0	1	1	0	0	0	0	0	0	0	0	0
2	0	0	1	0	0	33.11	0	77	116	71	1.36	0.44	4.08	0	0	0	0	0	0	1	1	0	0	0	0	0	0	0	0	0
2	0	0	1	0	0	39	0	65	108	72	1.55	0.69	3.81	0	0	0	0	0	0	1	1	0	0	0	0	0	0	0	0	0
2	0	0	1	0	0	43.11	0	71	102.5	80	2.04	0.7	5.5	0	0	0	0	0	0	1	1	0	0	0	0	0	0	0	0	0
2	0	0	1	0	0	23.08	0	68	119	80	1.55	0.89	4.7	0	0	0	0	0	0	1	1	0	0	0	0	0	0	0	0	0
2	0	0	1	1	1	29	0	76	129	83	1.71	1.24	5.3	0	0	0	0	0	0	1	1	0	0	0	0	0	0	0	0	0
2	0	0	1	0	0	50.08	0	70	110	70	1.03	0.69	7.65	0	0	1	1	0	0	7	7	0	0	0	0	0	0	0	0	0
2	0	0	1	0	0	24.05	0	73	112.5	70	1.16	1.29	6	0	0	1	1	0	0	7	7	0	0	0	0	0	0	0	0	0
2	0	0	1	0	0	34.11	0	78	92	78	1.1	0.98	6.23	0	0	1	1	0	0	7	7	0	0	0	0	0	0	0	0	0
2	0	0	1	0	0	29.09	0	73	110	50	0.7	0.49	6.4	0	0	1	1	0	0	7	7	0	0	0	0	0	0	0	0	0
2	0	0	1	0	0	26.11	0	67	117.5	70	1.83	0.51	6.9	0	0	0	1	0	0	7	7	0	0	0	0	0	0	0	0	0
2	0	0	1	0	0	52.1	0	70	120	65	1.82	1.29	5.8	0	0	0	1	0	0	7	7	0	0	0	0	0	0	0	0	0
2	0	0	1	0	0	34.05	0	78	115	70	1.47	0.74	5.95	0	0	0	1	0	0	7	7	0	0	0	0	0	0	0	0	0
2	0	0	1	0	0	34.03	0	72	120	70	1.55	0.67	6.8	0	0	0	1	0	0	7	7	0	0	0	0	0	0	0	0	0
2	0	0	1	0	0	41.01	0	69	128	83	1.62	1.29	6.6	0	0	0	1	0	0	7	7	0	0	0	0	0	0	0	0	0
2	0	0	1	0	0	46.06	0	56	122	82	2.02	0.74	5.81	0	0	0	1	0	0	7	7	0	0	0	0	0	0	0	0	0
2	0	0	1	0	0	60.11	0	73.7	121	82	3.21	0.58	6.5	0	0	0	1	0	0	7	7	0	0	0	0	0	0	0	0	0
2	0	0	1	0	0	32.01	0	63	110	68	1.01	1.7	4.32	0	1	1	0	0	0	7	7	0	0	0	0	0	0	0	0	0
2	0	0	1	0	0	27.09	0	62.2	114	76	1.98	2.48	4.94	0	1	0	0	0	0	7	7	0	0	0	0	0	0	0	0	0
2	0	0	1	0	1	39.04	0	78	105	82	1.48	0.94	4.33	0	0	0	0	0	0	1	1	0	0	0	0	0	0	0	0	0
2	0	0	1	1	0	35.08	0	81	110	75	1.21	0.47	5.9	1	0	1	1	0	1	7	4	0	0	0	0	1	0	0	0	1
2	0	0	1	0	0	27.07	0	83	91	68	1.06	0.49	5.18	0	0	1	0	0	1	7	3	0	0	0	0	1	0	0	0	1
2	0	0	1	0	0	25.11	0	84	129	62	1.08	1.01	4.01	0	0	1	0	0	1	7	3	0	0	0	0	1	0	0	0	1
2	0	0	1	0	0	42.02	0	81.6	129	84	1.23	0.57	4.41	0	0	1	0	0	1	7	3	0	0	0	0	1	0	0	0	1
2	0	0	1	0	0	37.1	0	81	120	84	0.93	0.69	3.61	0	0	1	0	0	1	7	3	0	0	0	0	1	0	0	0	1
2	0	0	1	0	0	40.1	0	86.9	117	68	1.26	0.64	3.81	0	0	1	0	0	1	7	3	0	0	0	0	1	0	0	0	1
2	0	0	1	0	0	47.11	0	85	119	78	1.01	0.73	3.68	0	0	1	0	0	1	7	3	0	0	0	0	1	0	0	0	1
2	0	0	1	0	0	31.06	0	88	115	75	1.09	0.67	4.9	0	0	1	0	0	1	7	3	0	0	0	0	1	0	0	0	1
2	0	0	1	0	0	21.02	0	80	104	68	1.72	0.68	4.16	0	0	0	0	0	1	7	2	0	0	0	0	1	0	0	0	1
2	0	0	1	0	0	31.04	0	80	116	78	1.96	0.64	5.2	0	0	0	0	0	1	7	2	0	0	0	0	1	0	0	0	1
2	0	0	1	0	0	30.1	0	83	111	79	1.89	0.57	4.5	0	0	0	0	0	1	7	2	0	0	0	0	1	0	0	0	1
2	0	0	1	0	0	28.01	0	81	110	70	1.3	0.55	5	0	0	0	0	0	1	7	2	0	0	0	0	1	0	0	0	1
2	0	0	1	0	0	28.03	0	84	119	83	2.31	1.09	4.91	0	0	0	0	0	1	7	2	0	0	0	0	1	0	0	0	1
2	0	0	1	0	0	24.11	0	83	118	84	1.3	1.42	4.07	0	0	0	0	0	1	7	2	0	0	0	0	1	0	0	0	1
2	0	0	1	0	0	47.08	0	85	111	70	1.69	0.66	5	0	0	0	0	0	1	7	2	0	0	0	0	1	0	0	0	1
2	0	0	1	0	0	37.1	0	85	96	72.5	1.63	0.66	5.18	0	0	0	0	0	1	7	2	0	0	0	0	1	0	0	0	1
2	0	0	1	0	0	37.02	0	87	115	75	1.64	0.85	5.5	0	0	0	0	0	1	7	2	0	0	0	0	1	0	0	0	1
2	0	0	1	0	0	38.09	0	89	123	79	1.68	0.99	5.49	0	0	0	0	0	1	7	2	0	0	0	0	1	0	0	0	1
2	0	0	1	0	0	37.11	0	87.6	106	68	1.37	1.11	5.26	0	0	0	0	0	1	7	2	0	0	0	0	1	0	0	0	1
2	0	0	1	0	0	43	0	86	96	60	1.4	1.27	4.56	0	0	0	0	0	1	7	2	0	0	0	0	1	0	0	0	1
2	0	0	1	0	0	32.06	0	93	100	74	1.52	0.85	4.3	0	0	0	0	0	1	7	2	0	0	0	0	1	0	0	0	1
2	0	0	1	0	0	38.03	0	90	119	76	1.3	1.05	5.21	0	0	0	0	0	1	7	2	0	0	0	0	1	0	0	0	1
2	0	0	1	0	0	33.09	0	90	111	80	1.51	0.78	4.9	0	0	0	0	0	1	7	2	0	0	0	0	1	0	0	0	1
2	0	0	1	0	0	33.1	0	105	111	82	1.79	0.54	4.76	0	0	0	0	0	1	7	2	0	0	0	0	1	0	0	0	1
1	0	0	1	0	1	34.07	0	92.4	125	79	1.72	1.16	4.9	0	0	0	0	0	1	7	2	0	0	0	0	1	0	0	0	1
1	0	0	1	0	0	28.11	0	92	110	70	2.16	1.71	5.9	1	1	0	1	0	1	7	4	0	0	0	0	1	0	0	0	1
2	0	0	1	1	0	39.03	0	86.2	94	62	1.66	1.86	5.6	1	1	0	1	0	1	7	4	0	0	0	0	1	0	0	0	1
2	0	0	1	0	0	29.05	0	87	102	64	0.75	0.76	7.26	1	0	1	1	0	1	7	4	0	0	0	0	1	0	0	0	1
2	0	0	1	0	0	37.01	0	84	126	83	1.6	1.19	6.6	0	0	0	1	0	1	7	3	0	0	0	0	1	0	0	0	1
2	0	0	1	0	0	32.01	0	81	99	66	2.08	1.46	6.8	0	0	0	1	0	1	7	3	0	0	0	0	1	0	0	0	1
2	0	0	1	0	0	39.1	0	80	113	73	1.96	0.73	5.9	0	0	0	1	0	1	7	3	0	0	0	0	1	0	0	0	1
2	0	0	1	0	0	23.11	0	86	109	79	1.78	0.88	6	0	0	0	1	0	1	7	3	0	0	0	0	1	0	0	0	1
2	0	0	1	0	0	39.04	0	86	89	55	1.86	0.45	5.8	0	0	0	1	0	1	7	3	0	0	0	0	1	0	0	0	1
2	0	0	1	0	0	41.01	0	91	112	79	1.99	0.72	5.6	0	0	0	1	0	1	7	3	0	0	0	0	1	0	0	0	1
2	0	0	1	0	0	35.11	0	95	109	77	0.91	2.5	5.1	1	1	1	0	0	1	7	4	0	0	0	0	1	0	0	0	1
2	0	0	1	0	0	34.09	0	83	108	77	2.18	2.16	5.3	0	1	0	0	0	1	7	3	0	0	0	0	1	0	0	0	1
2	0	0	1	0	0	34.1	0	103.1	114	79	1.84	1.95	5	0	1	0	0	0	1	7	3	0	0	0	0	1	0	0	0	1
2	0	0	1	0	1	40.09	0	81	111	80	1	0.67	5.43	0	0	1	0	0	1	7	3	0	0	0	0	1	0	0	0	1
2	0	0	1	0	1	27.03	0	86	115	75	1.4	0.69	4.08	0	0	0	0	0	1	7	2	0	0	0	0	1	0	0	0	1
2	0	0	1	0	0	38	0	84	90	70	1.87	3.17	5.6	1	1	0	1	0	1	7	4	0	0	0	0	1	0	0	0	1
2	0	0	1	0	1	32.1	0	95	129	75	1.9	2.85	4.29	0	1	0	0	0	1	7	3	0	0	0	0	1	0	0	0	1
2	0	0	1	0	1	27.02	0	96	95	60	2.61	2.21	3.6	0	1	0	0	0	1	7	3	0	0	0	0	1	0	0	0	1
2	0	0	1	0	1	27.06	0	84	121	61	3.25	2.48	5.6	1	1	0	1	0	1	7	4	0	0	0	0	1	0	0	0	1
1	0	0	1	0	0	24.03	0	78	120	70	0.96	1.49	5.06	0	0	1	0	0	0	7	7	0	0	0	0	0	0	0	0	0
1	0	0	1	0	0	23.02	0	67	120	80	0.99	0.32	5.27	0	0	1	0	0	0	7	7	0	0	0	0	0	0	0	0	0
1	0	0	1	0	0	27.09	0	86	109	70	0.89	0.6	5.41	0	0	1	0	0	0	7	7	0	0	0	0	0	0	0	0	0
1	0	0	1	0	0	24	0	73	110	80	0.98	0.38	5.47	0	0	1	0	0	0	7	7	0	0	0	0	0	0	0	0	0
2	0	0	1	1	0	24	0	79	118	70	0.86	1.41	4.39	0	0	1	0	0	0	7	7	0	0	0	0	0	0	0	0	0
1	0	0	1	0	0	36.09	0	79	119	70	1.75	0.58	4.63	0	0	0	0	0	0	1	1	0	0	0	0	0	0	0	0	0
1	0	0	1	0	0	19.01	0	73	100	70	1.4	0.66	5.32	0	0	0	0	0	0	1	1	0	0	0	0	0	0	0	0	0
1	0	0	1	0	0	31.11	0	75	110	80	1.46	0.92	4.35	0	0	0	0	0	0	1	1	0	0	0	0	0	0	0	0	0
1	0	0	1	0	0	29.06	0	75	120	70	1.53	0.66	4.51	0	0	0	0	0	0	1	1	0	0	0	0	0	0	0	0	0
1	0	0	1	0	0	50.07	0	85	120	80	1.42	0.77	4.04	0	0	0	0	0	0	1	1	0	0	0	0	0	0	0	0	0
1	0	0	1	0	0	23.09	0	75	100	70	1.13	0.94	4.43	0	0	0	0	0	0	1	1	0	0	0	0	0	0	0	0	0
1	0	0	1	0	0	20.08	0	76	110	70	1.22	0.77	4.82	0	0	0	0	0	0	1	1	0	0	0	0	0	0	0	0	0
1	0	0	1	0	0	21.06	0	74	90	60	1.09	0.33	4.09	0	0	0	0	0	0	1	1	0	0	0	0	0	0	0	0	0
1	0	0	1	0	0	21.08	0	78	110	60	1.07	0.66	4.33	0	0	0	0	0	0	1	1	0	0	0	0	0	0	0	0	0
1	0	0	1	0	0	27	0	76	110	70	1.21	1.02	4.95	0	0	0	0	0	0	1	1	0	0	0	0	0	0	0	0	0
1	0	0	1	0	0	33.11	0	75	122	70	1.15	0.47	3.4	0	0	0	0	0	0	1	1	0	0	0	0	0	0	0	0	0
1	0	0	1	0	0	23.11	0	63	100	70	1.75	1.2	4.76	0	0	0	0	0	0	1	1	0	0	0	0	0	0	0	0	0
1	0	0	1	0	0	21.09	0	74	90	60	1.58	0.6	5.13	0	0	0	0	0	0	1	1	0	0	0	0	0	0	0	0	0
1	0	0	1	0	0	34.08	0	77	120	74	1.62	0.51	4.57	0	0	0	0	0	0	1	1	0	0	0	0	0	0	0	0	0
1	0	0	1	0	0	30.02	0	75	100	60	1.62	0.67	5.59	0	0	0	0	0	0	1	1	0	0	0	0	0	0	0	0	0
1	0	0	1	0	0	22.11	0	69	120	70	1.9	0.87	5.12	0	0	0	0	0	0	1	1	0	0	0	0	0	0	0	0	0
1	0	0	1	0	0	33	0	79	110	80	1.06	0.75	5.44	0	0	0	0	0	0	1	1	0	0	0	0	0	0	0	0	0
1	0	0	1	0	0	50	0	85	120	80	1.14	0.94	4.78	0	0	0	0	0	0	1	1	0	0	0	0	0	0	0	0	0
1	0	0	1	0	0	27.06	0	83	120	70	1.16	0.91	6.51	0	0	0	1	0	0	7	7	0	0	0	0	0	0	0	0	0
1	0	0	1	0	0	27	0	84	122	80	1.31	1.55	6.11	0	0	0	1	0	0	7	7	0	0	0	0	0	0	0	0	0
1	0	0	1	0	0	27.06	0	75	120	70	1.29	1.02	3.61	0	1	1	0	0	0	7	7	0	0	0	0	0	0	0	0	0
1	0	0	1	0	0	31	0	84	120	80	1.02	8.6	4.36	0	1	1	0	0	0	7	7	0	0	0	0	0	0	0	0	0
1	0	0	1	0	0	53	0	70	120	70	0.84	0.55	4.08	0	1	1	0	0	0	7	7	0	0	0	0	0	0	0	0	0
1	0	0	1	0	0	37	0	74	110	72	1.12	6.3	4.84	0	1	0	0	0	0	7	7	0	0	0	0	0	0	0	0	0
2	0	0	1	0	0	29	0	71	120	70	1.12	0.37	3.05	0	0	1	0	0	0	7	7	0	0	0	0	0	0	0	0	0
2	0	0	1	0	0	20	0	70	110	70	0.92	1.06	5.04	0	0	1	0	0	0	7	7	0	0	0	0	0	0	0	0	0
2	0	0	1	0	0	30	0	75	124	76	0.71	0.93	2.87	0	0	1	0	0	0	7	7	0	0	0	0	0	0	0	0	0
2	0	0	1	0	0	29	0	70	110	60	0.63	0.5	3.65	0	0	1	0	0	0	7	7	0	0	0	0	0	0	0	0	0
2	0	0	1	0	0	25.06	0	76	90	60	1.25	0.41	5.21	0	0	1	0	0	0	7	7	0	0	0	0	0	0	0	0	0
2	0	0	1	0	0	29.02	0	69	118	78	1.24	0.67	3.38	0	0	1	0	0	0	7	7	0	0	0	0	0	0	0	0	0
2	0	0	1	0	0	33.02	0	71	98	60	1.06	0.64	5.26	0	0	1	0	0	0	7	7	0	0	0	0	0	0	0	0	0
2	0	0	1	0	0	24	0	70	120	80	1	0.47	4.32	0	0	1	0	0	0	7	7	0	0	0	0	0	0	0	0	0
2	0	0	1	0	0	38.09	0	66	108	74	1.23	0.38	3.42	0	0	1	0	0	0	7	7	0	0	0	0	0	0	0	0	0
2	0	0	1	0	0	35.05	0	77	126	70	1.21	0.7	3.73	0	0	1	0	0	0	7	7	0	0	0	0	0	0	0	0	0
2	0	0	1	0	0	26.02	0	75	120	80	1.06	0.53	4.67	0	0	1	0	0	0	7	7	0	0	0	0	0	0	0	0	0
2	0	0	1	0	0	19.09	0	74	121	78	0.97	1.25	4.37	0	0	1	0	0	0	7	7	0	0	0	0	0	0	0	0	0
2	0	0	1	0	0	26	0	66	120	70	1.03	0.9	3.57	0	0	1	0	0	0	7	7	0	0	0	0	0	0	0	0	0
2	0	0	1	0	0	40.06	0	70	120	80	1.11	0.79	4.66	0	0	1	0	0	0	7	7	0	0	0	0	0	0	0	0	0
2	0	0	1	0	0	36.08	0	73	126	80	0.87	0.49	4.43	0	0	1	0	0	0	7	7	0	0	0	0	0	0	0	0	0
1	0	0	1	0	1	27	0	71	120	70	0.96	0.35	5.38	0	0	1	0	0	0	7	7	0	0	0	0	0	0	0	0	0
2	0	0	1	0	0	24	0	70	121	70	1.72	0.79	5.22	0	0	0	0	0	0	1	1	0	0	0	0	0	0	0	0	0
2	0	0	1	0	0	22	0	69	108	60	1.42	0.66	4.23	0	0	0	0	0	0	1	1	0	0	0	0	0	0	0	0	0
2	0	0	1	0	0	29	0	76	110	60	1.48	0.76	4.8	0	0	0	0	0	0	1	1	0	0	0	0	0	0	0	0	0
2	0	0	1	0	0	26	0	75	110	80	1.77	0.54	4.38	0	0	0	0	0	0	1	1	0	0	0	0	0	0	0	0	0
2	0	0	1	0	0	44	0	73	100	58	1.32	1.25	4.81	0	0	0	0	0	0	1	1	0	0	0	0	0	0	0	0	0
2	0	0	1	0	0	38.06	0	75	120	68	1.68	0.99	3.6	0	0	0	0	0	0	1	1	0	0	0	0	0	0	0	0	0
2	0	0	1	0	0	37	0	74	120	80	1.45	0.36	5.49	0	0	0	0	0	0	1	1	0	0	0	0	0	0	0	0	0
2	0	0	1	0	0	22.04	0	64	122	80	1.71	1.33	4.14	0	0	0	0	0	0	1	1	0	0	0	0	0	0	0	0	0
2	0	0	1	0	0	31.02	0	65	110	60	1.54	0.73	4.69	0	0	0	0	0	0	1	1	0	0	0	0	0	0	0	0	0
2	0	0	1	0	0	23.1	0	65	110	74	1.33	0.92	4.73	0	0	0	0	0	0	1	1	0	0	0	0	0	0	0	0	0
2	0	0	1	0	0	24.09	0	79	100	60	1.3	1.06	4.37	0	0	0	0	0	0	1	1	0	0	0	0	0	0	0	0	0
2	0	0	1	0	0	27.08	0	78	90	60	1.4	0.9	3.65	0	0	0	0	0	0	1	1	0	0	0	0	0	0	0	0	0
2	0	0	1	0	0	38.01	0	74	123	80	1.9	0.33	4.18	0	0	0	0	0	0	1	1	0	0	0	0	0	0	0	0	0
2	0	0	1	0	0	35.09	0	68	110	70	1.45	0.77	3.86	0	0	0	0	0	0	1	1	0	0	0	0	0	0	0	0	0
2	0	0	1	0	0	38.11	0	79	100	70	1.52	1.24	5.21	0	0	0	0	0	0	1	1	0	0	0	0	0	0	0	0	0
2	0	0	1	0	0	31.06	0	75	102	80	1.38	0.47	4.61	0	0	0	0	0	0	1	1	0	0	0	0	0	0	0	0	0
2	0	0	1	0	0	43.1	0	75	125	80	1.36	1.29	4.85	0	0	0	0	0	0	1	1	0	0	0	0	0	0	0	0	0
1	0	0	1	0	1	24	0	74	120	80	1.31	0.8	5.58	0	0	0	0	0	0	1	1	0	0	0	0	0	0	0	0	0
1	0	0	1	0	0	27.06	0	80	108	68	1.07	1.71	6.44	0	1	0	1	0	0	7	7	0	0	0	0	0	0	0	0	0
2	0	0	1	0	0	23	0	59	110	70	1.05	1.05	5.6	0	0	1	1	0	0	7	7	0	0	0	0	0	0	0	0	0
2	0	0	1	0	0	32.04	0	67	120	70	1.28	0.6	6.21	0	0	1	1	0	0	7	7	0	0	0	0	0	0	0	0	0
2	0	0	1	0	0	24.11	0	77	118	70	0.57	0.75	5.9	0	0	1	1	0	0	7	7	0	0	0	0	0	0	0	0	0
2	0	0	1	0	0	24.02	0	73	110	70	1.51	0.8	7.26	0	0	0	1	0	0	7	7	0	0	0	0	0	0	0	0	0
2	0	0	1	0	0	32	0	79	112	81	1.59	0.96	6.46	0	0	0	1	0	0	7	7	0	0	0	0	0	0	0	0	0
2	0	0	1	0	0	32.08	0	73	102	71	1.32	0.42	5.75	0	0	0	1	0	0	7	7	0	0	0	0	0	0	0	0	0
2	0	0	1	0	0	42.01	0	68	110	80	1.66	0.61	5.97	0	0	0	1	0	0	7	7	0	0	0	0	0	0	0	0	0
1	0	0	1	0	1	43.06	0	73	120	80	1.17	0.81	5.63	0	0	0	1	0	0	7	7	0	0	0	0	0	0	0	0	0
2	0	0	1	0	0	41.08	0	76	120	80	0.58	6.2	2.85	0	1	1	0	0	0	7	7	0	0	0	0	0	0	0	0	0
2	0	0	1	0	0	23	0	59	120	84	1.09	2.4	3.54	0	1	1	0	0	0	7	7	0	0	0	0	0	0	0	0	0
2	0	0	1	0	0	31	0	75	110	75.5	0.91	3.2	4.89	0	1	1	0	0	0	7	7	0	0	0	0	0	0	0	0	0
2	0	0	1	0	0	34	0	70	110	70	0.97	6.6	3.77	0	1	1	0	0	0	7	7	0	0	0	0	0	0	0	0	0
2	0	0	1	0	0	27	0	73	120	80	0.97	5.1	4.6	0	1	1	0	0	0	7	7	0	0	0	0	0	0	0	0	0
2	0	0	1	0	0	35	0	70	129	81	0.88	2.7	4.81	0	1	1	0	0	0	7	7	0	0	0	0	0	0	0	0	0
2	0	0	1	0	0	18	0	62	110	80	0.97	8	4.04	0	1	1	0	0	0	7	7	0	0	0	0	0	0	0	0	0
2	0	0	1	0	0	42.08	0	77	120	70	1	0.91	5.43	0	1	1	0	0	0	7	7	0	0	0	0	0	0	0	0	0
2	0	0	1	0	0	48	0	72	110	80	1.39	2.1	4.68	0	1	0	0	0	0	7	7	0	0	0	0	0	0	0	0	0
2	0	0	1	0	1	28	0	70	110	80	0.95	0.56	4.19	0	0	1	0	0	0	7	7	0	0	0	0	0	0	0	0	0
1	0	0	1	0	0	36.03	0	104	110	80	1.19	1.45	4.48	0	0	0	0	0	1	7	2	0	0	0	0	1	0	0	0	1
1	0	0	1	0	0	24	0	98	110	81	1.25	0.7	5.75	0	0	0	1	0	1	7	3	0	0	0	0	1	0	0	0	1
2	0	0	1	0	1	51	0	70	110	70	1.84	0.48	6.3	0	0	0	1	0	0	7	7	0	0	0	0	0	0	0	0	0
2	0	0	1	0	0	22	0	83	110	70	0.63	1.09	3.28	0	0	1	0	0	1	7	3	0	0	0	0	1	0	0	0	1
2	0	0	1	0	0	39.03	0	84	110	70	1.16	1.28	5.54	0	0	1	0	0	1	7	3	0	0	0	0	1	0	0	0	1
2	0	0	1	0	0	36.1	0	80	120	70	1.27	0.75	5.05	0	0	1	0	0	1	7	3	0	0	0	0	1	0	0	0	1
2	0	0	1	0	0	39.06	0	80	100	80	1.15	0.72	4.16	0	0	1	0	0	1	7	3	0	0	0	0	1	0	0	0	1
2	0	0	1	0	0	28.08	0	88	120	70	0.89	0.75	5.04	0	0	1	0	0	1	7	3	0	0	0	0	1	0	0	0	1
2	0	0	1	0	0	33.1	0	85	120	70	0.88	1.41	3.64	0	0	1	0	0	1	7	3	0	0	0	0	1	0	0	0	1
2	0	0	1	0	0	35.03	0	102	128	81	1.17	0.6	4.29	0	0	1	0	0	1	7	3	0	0	0	0	1	0	0	0	1
2	0	0	1	0	0	44	0	81	110	70	1.3	0.76	4.66	0	0	0	0	0	1	7	2	0	0	0	0	1	0	0	0	1
2	0	0	1	0	0	25.03	0	83	120	70	1.55	0.88	4.11	0	0	0	0	0	1	7	2	0	0	0	0	1	0	0	0	1
2	0	0	1	0	0	23	0	88	100	70	1.72	0.54	4.03	0	0	0	0	0	1	7	2	0	0	0	0	1	0	0	0	1
2	0	0	1	0	0	31	0	85	109	72	1.37	1.33	5.53	0	0	0	0	0	1	7	2	0	0	0	0	1	0	0	0	1
2	0	0	1	0	0	44.08	0	87	110	80	1.81	0.77	4.84	0	0	0	0	0	1	7	2	0	0	0	0	1	0	0	0	1
2	0	0	1	0	0	49.05	0	95	120	81	1.42	1.56	5.38	0	0	0	0	0	1	7	2	0	0	0	0	1	0	0	0	1
2	0	0	1	0	0	34.1	0	98	110	70	1.44	1.04	5.01	0	0	0	0	0	1	7	2	0	0	0	0	1	0	0	0	1
1	0	0	1	0	1	47	0	93	100	80	1.15	0.61	4.31	0	0	0	0	0	1	7	2	0	0	0	0	1	0	0	0	1
2	0	0	1	0	0	47.04	0	90	120	81	0.81	1.69	14.85	1	0	1	1	0	1	7	4	0	0	0	0	1	0	0	0	1
2	0	0	1	0	0	34.03	0	80	124	81	1.28	0.62	5.79	1	0	1	1	0	1	7	4	0	0	0	0	1	0	0	0	1
2	0	0	1	0	0	47.04	0	89	90	70	1.27	0.83	5.69	1	0	1	1	0	1	7	4	0	0	0	0	1	0	0	0	1
2	0	0	1	0	0	46.11	0	90	110	70	1.13	0.78	6.22	1	0	1	1	0	1	7	4	0	0	0	0	1	0	0	0	1
2	0	0	1	0	0	23	0	108	120	70	1.02	0.92	5.64	1	0	1	1	0	1	7	4	0	0	0	0	1	0	0	0	1
2	0	0	1	0	0	35.08	0	94	110	70	0.99	1.5	5.89	1	0	1	1	0	1	7	4	0	0	0	0	1	0	0	0	1
2	0	0	1	0	0	38.07	0	128	114	70	1.06	0.32	5.67	1	0	1	1	0	1	7	4	0	0	0	0	1	0	0	0	1
2	0	0	1	0	0	24.07	0	84	110	70	1.47	0.92	5.69	0	0	0	1	0	1	7	3	0	0	0	0	1	0	0	0	1
2	0	0	1	0	0	25.02	0	84	110	80	1.51	1.53	6	0	0	0	1	0	1	7	3	0	0	0	0	1	0	0	0	1
2	0	0	1	0	0	26.11	0	86	116	78	1.45	0.72	5.72	0	0	0	1	0	1	7	3	0	0	0	0	1	0	0	0	1
2	0	0	1	0	0	45.02	0	92	114	72	1.51	1.57	5.65	0	0	0	1	0	1	7	3	0	0	0	0	1	0	0	0	1
2	0	0	1	0	0	28.01	0	82	120	70	1.44	0.88	4.14	1	1	1	0	0	1	7	4	0	0	0	0	1	0	0	0	1
2	0	0	1	0	0	46	0	85	120	80	0.84	1.29	5.22	1	1	1	0	0	1	7	4	0	0	0	0	1	0	0	0	1
2	0	0	1	0	0	35.04	0	89	100	50	1.18	0.88	4.42	1	1	1	0	0	1	7	4	0	0	0	0	1	0	0	0	1
2	0	0	1	0	0	31.09	0	112	120	80	1	0.97	5.55	1	1	1	0	0	1	7	4	0	0	0	0	1	0	0	0	1
2	0	0	1	0	0	39	0	87	110	70	1.17	8.5	5.57	1	1	1	0	0	1	7	4	0	0	0	0	1	0	0	0	1
2	0	0	1	0	0	28.05	0	102	120	82	1.17	2.48	5.46	1	1	1	0	0	1	7	4	0	0	0	0	1	0	0	0	1
2	0	0	1	0	0	39	0	87	120	80	1.58	1.74	4.98	0	1	0	0	0	1	7	3	0	0	0	0	1	0	0	0	1
2	0	0	1	0	1	49.04	0	80	122	72	1.36	1.76	5.62	1	1	0	1	0	1	7	4	0	0	0	0	1	0	0	0	1
2	0	0	1	0	1	30.1	0	80	120	80	1.4	1.9	5.78	1	1	0	1	0	1	7	4	0	0	0	0	1	0	0	0	1
1	0	1	1	0	0	32.06	0	98	129	84	0.98	1.17	5.4	0	0	1	0	0	1	7	3	0	0	0	0	1	0	0	0	1
1	0	1	1	0	0	45.01	0	93	116	82	2.17	0.83	5	0	0	0	0	0	1	7	2	0	0	0	0	1	0	0	0	1
1	0	1	1	0	0	36.01	0	99	120	80	2.06	1.49	5.1	0	0	0	0	0	1	7	2	0	0	0	0	1	0	0	0	1
2	0	1	1	1	0	41.01	0	80	119	80	1.17	0.94	6.15	1	0	1	1	0	1	7	4	0	0	0	0	1	0	0	0	1
1	0	1	1	1	0	31.04	0	74	128	74	1.09	0.61	4.66	0	0	0	0	0	0	1	1	0	0	0	0	0	0	0	0	0
2	0	1	1	0	0	40.08	0	83	110	70	1.18	0.47	6.02	1	0	1	1	0	1	7	4	0	0	0	0	1	0	0	0	1
2	0	1	1	0	1	26.03	0	84	128	72	1.13	1.49	4.9	0	0	1	0	0	1	7	3	0	0	0	0	1	0	0	0	1
1	1	0	0	0	0	35.11	0	82	119	75.5	0.95	1.52	4.37	0	0	1	0	0	0	7	7	0	0	0	0	0	0	0	0	0
1	1	0	0	0	0	38.1	0	84	125	81	0.9	0.61	4.15	0	0	1	0	0	0	7	7	0	0	0	0	0	0	0	0	0
1	1	0	0	0	0	28.06	0	76	124	71	1.79	0.64	4.1	0	0	0	0	0	0	1	1	0	0	0	0	0	0	0	0	0
1	1	0	0	0	0	37.1	0	77	118	70	1.69	1.06	4.28	0	0	0	0	0	0	1	1	0	0	0	0	0	0	0	0	0
1	1	0	0	0	0	36.07	0	81	111	72	1.72	0.98	5.3	0	0	0	0	0	0	1	1	0	0	0	0	0	0	0	0	0
1	1	0	0	0	0	36.06	0	72	120	80	1.65	0.57	3.48	0	0	0	0	0	0	1	1	0	0	0	0	0	0	0	0	0
1	1	0	0	0	0	43.11	0	83	118	76	1.99	0.75	4.54	0	0	0	0	0	0	1	1	0	0	0	0	0	0	0	0	0
1	1	0	0	0	0	56.11	0	80	124	84	1.64	0.77	5.1	0	0	0	0	0	0	1	1	0	0	0	0	0	0	0	0	0
1	1	0	0	0	0	59.08	0	78.8	110	79	1.86	0.94	5.27	0	0	0	0	0	0	1	1	0	0	0	0	0	0	0	0	0
1	1	0	0	0	0	29.05	0	78	125	75	1.33	0.84	4.91	0	0	0	0	0	0	1	1	0	0	0	0	0	0	0	0	0
1	1	0	0	0	0	39.11	0	81.6	118	79	1.36	0.91	4.26	0	0	0	0	0	0	1	1	0	0	0	0	0	0	0	0	0
1	1	0	0	0	0	37.04	0	70	115	79	1.45	0.89	4	0	0	0	0	0	0	1	1	0	0	0	0	0	0	0	0	0
1	1	0	0	0	0	40.09	0	75	110	70	1.08	0.8	4.28	0	0	0	0	0	0	1	1	0	0	0	0	0	0	0	0	0
1	1	0	0	0	0	44.11	0	81	105	70	1.13	1.12	4.55	0	0	0	0	0	0	1	1	0	0	0	0	0	0	0	0	0
1	1	0	0	0	0	47.06	0	77	118	78	1.06	1.52	4.48	0	0	0	0	0	0	1	1	0	0	0	0	0	0	0	0	0
1	1	0	0	0	0	34.04	0	80	124	78	0.97	0.8	5.96	0	0	1	1	0	0	7	7	0	0	0	0	0	0	0	0	0
1	1	0	0	0	0	40.11	0	85	116	78	0.98	1.58	5.75	0	0	1	1	0	0	7	7	0	0	0	0	0	0	0	0	0
1	1	0	0	0	0	66.06	0	88	119	80	1.96	0.59	6.1	0	0	0	1	0	0	7	7	0	0	0	0	0	0	0	0	0
1	1	0	0	0	0	48.03	0	78	115	70	1.37	0.68	6.03	0	0	0	1	0	0	7	7	0	0	0	0	0	0	0	0	0
1	1	0	0	0	0	53.05	0	69	119	79	1.61	0.61	6.7	0	0	0	1	0	0	7	7	0	0	0	0	0	0	0	0	0
1	1	0	0	0	0	52.1	0	66	113	75	1.78	0.6	5.8	0	0	0	1	0	0	7	7	0	0	0	0	0	0	0	0	0
1	1	0	0	0	0	64.02	0	89	120	75	1.23	1.32	5.8	0	0	0	1	0	0	7	7	0	0	0	0	0	0	0	0	0
1	1	0	0	0	0	39.08	0	80	110	80	1.34	2.21	4.58	0	1	0	0	0	0	7	7	0	0	0	0	0	0	0	0	0
2	1	0	0	0	0	37.11	0	79	118	60	1.07	0.58	4.69	0	0	1	0	0	0	7	7	0	0	0	0	0	0	0	0	0
2	1	0	0	0	0	48.07	0	65	127	79	1.11	0.58	4.21	0	0	1	0	0	0	7	7	0	0	0	0	0	0	0	0	0
2	1	0	0	0	0	32.1	0	68	95	65	0.92	1.1	5.1	0	0	1	0	0	0	7	7	0	0	0	0	0	0	0	0	0
2	1	0	0	0	0	44.02	0	71	112	67	1.63	0.63	5.54	0	0	0	0	0	0	1	1	0	0	0	0	0	0	0	0	0
2	1	0	0	0	0	48.1	0	71	110	70	1.79	0.84	5.12	0	0	0	0	0	0	1	1	0	0	0	0	0	0	0	0	0
2	1	0	0	0	0	39.09	0	67	108	80	1.6	1.15	5.02	0	0	0	0	0	0	1	1	0	0	0	0	0	0	0	0	0
2	1	0	0	0	0	44.05	0	78	129	78	1.48	0.62	5.3	0	0	0	0	0	0	1	1	0	0	0	0	0	0	0	0	0
2	1	0	0	0	0	43.1	0	66	103	60	1.79	0.48	5.6	0	0	0	1	0	0	7	7	0	0	0	0	0	0	0	0	0
2	1	0	0	0	0	40	0	74	110	67	1.62	1.44	5.9	0	0	0	1	0	0	7	7	0	0	0	0	0	0	0	0	0
2	1	0	0	0	0	44	0	68	120	79	1.32	0.48	6.2	0	0	0	1	0	0	7	7	0	0	0	0	0	0	0	0	0
1	1	0	0	0	1	38.01	0	78	122	84	1.51	1.91	5.42	0	1	0	0	0	0	7	7	0	0	0	0	0	0	0	0	0
2	1	0	0	0	1	53.1	0	77	123	78	1.13	1.01	4.68	0	0	1	0	0	0	7	7	0	0	0	0	0	0	0	0	0
1	1	0	0	0	0	43.08	0	93.4	120	79	1.33	0.64	4.9	0	0	0	0	0	1	7	2	0	0	0	0	1	0	0	0	1
1	1	0	0	0	0	27.01	0	96	122	79	1.09	1	4.9	0	0	0	0	0	1	7	2	0	0	0	0	1	0	0	0	1
2	1	0	0	0	1	32.09	0	73	101	52	1.33	0.56	6.31	0	0	0	1	0	0	7	7	0	0	0	0	0	0	0	0	0
2	1	0	0	0	1	40.06	0	70	107	80	1.89	0.58	6.1	0	0	0	1	0	0	7	7	0	0	0	0	0	0	0	0	0
2	1	0	0	0	0	55.1	0	80	129	78	1.24	0.55	4.12	0	0	1	0	0	1	7	3	0	0	0	0	1	0	0	0	1
2	1	0	0	0	0	35	0	81	98	56	1.07	0.9	3.88	0	0	1	0	0	1	7	3	0	0	0	0	1	0	0	0	1
2	1	0	0	0	0	51.02	0	80	100	84	1.96	1.32	5.4	0	0	0	0	0	1	7	2	0	0	0	0	1	0	0	0	1
2	1	0	0	0	0	36.03	0	81	118	80	1.59	0.79	5.49	0	0	0	0	0	1	7	2	0	0	0	0	1	0	0	0	1
2	1	0	0	0	0	44.08	0	92	119	74.5	1.37	0.83	5.2	0	0	0	0	0	1	7	2	0	0	0	0	1	0	0	0	1
2	1	0	0	0	0	49.09	0	88	121	76	1.69	1.2	5.7	0	0	0	1	0	1	7	3	0	0	0	0	1	0	0	0	1
2	1	0	0	0	0	54.07	0	87.8	120	80	1.36	0.81	6.6	0	0	0	1	0	1	7	3	0	0	0	0	1	0	0	0	1
2	1	0	0	0	0	49.05	0	91	104	80	1.33	1.12	5.67	0	0	0	1	0	1	7	3	0	0	0	0	1	0	0	0	1
2	1	0	0	0	0	53.1	0	91	112	64	1.18	0.93	5.18	1	1	1	0	0	1	7	4	0	0	0	0	1	0	0	0	1
2	1	0	0	0	0	52.03	0	87	123	70	1.38	2.15	5.42	0	1	0	0	0	1	7	3	0	0	0	0	1	0	0	0	1
2	1	0	0	0	1	42.08	0	82	113	80	1.71	1.14	4.68	0	0	0	0	0	1	7	2	0	0	0	0	1	0	0	0	1
2	1	0	0	0	1	43.1	0	93	121	79	2.14	0.83	5.2	0	0	0	0	0	1	7	2	0	0	0	0	1	0	0	0	1
1	1	0	0	0	0	33.11	0	68	120	80	1.03	1.56	5.13	0	0	1	0	0	0	7	7	0	0	0	0	0	0	0	0	0
1	1	0	0	0	0	33	0	69	100	60	1.02	0.68	3.56	0	0	1	0	0	0	7	7	0	0	0	0	0	0	0	0	0
1	1	0	0	0	0	36	0	85	120	70	0.66	1.12	5.22	0	0	1	0	0	0	7	7	0	0	0	0	0	0	0	0	0
1	1	0	0	0	0	71.02	0	84	116	78	1	0.81	5.13	0	0	1	0	0	0	7	7	0	0	0	0	0	0	0	0	0
1	1	0	0	0	0	36	0	82	120	60	0.98	0.55	5.16	0	0	1	0	0	0	7	7	0	0	0	0	0	0	0	0	0
1	1	0	0	0	0	34	0	86	124	60	0.67	0.8	4.22	0	0	1	0	0	0	7	7	0	0	0	0	0	0	0	0	0
1	1	0	0	0	0	25.06	0	77	120	80	1.72	1.22	4.82	0	0	0	0	0	0	1	1	0	0	0	0	0	0	0	0	0
1	1	0	0	0	0	35.05	0	83	106	74	1.64	0.64	4.11	0	0	0	0	0	0	1	1	0	0	0	0	0	0	0	0	0
1	1	0	0	0	0	46.07	0	82	100	70	1.6	0.43	4.41	0	0	0	0	0	0	1	1	0	0	0	0	0	0	0	0	0
1	1	0	0	0	0	33.02	0	68	88	50	1.38	1.49	5.06	0	0	0	0	0	0	1	1	0	0	0	0	0	0	0	0	0
1	1	0	0	0	0	30.07	0	70	129	68	1.36	1.05	5.23	0	0	0	0	0	0	1	1	0	0	0	0	0	0	0	0	0
1	1	0	0	0	0	38.02	0	70	116	72	1.5	0.64	3.93	0	0	0	0	0	0	1	1	0	0	0	0	0	0	0	0	0
1	1	0	0	0	0	38.04	0	75	110	60	1.4	0.45	3.95	0	0	0	0	0	0	1	1	0	0	0	0	0	0	0	0	0
1	1	0	0	0	0	34.09	0	76	110	70	1.14	0.85	4.75	0	0	0	0	0	0	1	1	0	0	0	0	0	0	0	0	0
1	1	0	0	0	0	57.03	0	83	129	80	1.29	0.46	3.83	0	0	0	0	0	0	1	1	0	0	0	0	0	0	0	0	0
1	1	0	0	0	0	39	0	74	116	80	1.14	1.18	5.46	0	0	0	0	0	0	1	1	0	0	0	0	0	0	0	0	0
1	1	0	0	0	0	40	0	85	120	80	1.26	0.53	4.55	0	0	0	0	0	0	1	1	0	0	0	0	0	0	0	0	0
1	1	0	0	0	0	37	0	83	110	70	0.79	0.85	6.04	0	0	1	1	0	0	7	7	0	0	0	0	0	0	0	0	0
1	1	0	0	0	0	67	0	84	110	70	0.94	0.54	6.44	0	0	1	1	0	0	7	7	0	0	0	0	0	0	0	0	0
1	1	0	0	0	0	53	0	82	120	70	0.76	1.13	5.65	0	0	1	1	0	0	7	7	0	0	0	0	0	0	0	0	0
1	1	0	0	0	0	50.04	0	80	100	70	1.23	0.92	7.01	0	0	0	1	0	0	7	7	0	0	0	0	0	0	0	0	0
1	1	0	0	0	0	50.09	0	85	120	80	1.18	1.33	7.83	0	0	0	1	0	0	7	7	0	0	0	0	0	0	0	0	0
1	1	0	0	0	0	28	0	84	114	80	1.22	0.47	6.38	0	0	0	1	0	0	7	7	0	0	0	0	0	0	0	0	0
1	1	0	0	0	0	35	0	74	110	60	1.01	4.8	5.3	0	1	1	0	0	0	7	7	0	0	0	0	0	0	0	0	0
1	1	0	0	0	0	33.11	0	82	100	70	0.81	0.59	3.87	0	1	1	0	0	0	7	7	0	0	0	0	0	0	0	0	0
1	1	0	0	0	0	22	0	80	120	70	1.25	3.3	3.25	0	1	0	0	0	0	7	7	0	0	0	0	0	0	0	0	0
1	1	0	0	0	0	39	0	80	110	70	1.09	6.3	4.79	0	1	0	0	0	0	7	7	0	0	0	0	0	0	0	0	0
2	1	0	0	0	0	41	0	75	110	80	1.04	0.81	4.21	0	0	1	0	0	0	7	7	0	0	0	0	0	0	0	0	0
2	1	0	0	0	0	30.1	0	69	116	76	0.78	0.58	3.22	0	0	1	0	0	0	7	7	0	0	0	0	0	0	0	0	0
2	1	0	0	0	0	39.11	0	79	124	82	1.11	1.4	5.51	0	0	1	0	0	0	7	7	0	0	0	0	0	0	0	0	0
1	1	0	0	0	1	21	0	76	110	70	1.15	0.95	3.93	0	0	0	0	0	0	1	1	0	0	0	0	0	0	0	0	0
1	1	0	0	0	0	39	0	65	100	70	1.06	9.3	5.75	0	1	0	1	0	0	7	7	0	0	0	0	0	0	0	0	0
2	1	0	0	0	0	58	0	73	120	60	0.81	0.86	7.38	0	0	1	1	0	0	7	7	0	0	0	0	0	0	0	0	0
2	1	0	0	0	0	55.08	0	78	124	80	1.65	0.75	5.58	0	1	1	0	0	0	7	7	0	0	0	0	0	0	0	0	0
2	1	0	0	0	0	35	0	72	110	70	0.83	3.6	4.5	0	1	1	0	0	0	7	7	0	0	0	0	0	0	0	0	0
1	1	0	0	0	0	36.08	0	90	118	74	1.02	0.84	5.44	0	0	1	0	0	1	7	3	0	0	0	0	1	0	0	0	1
1	1	0	0	0	0	40	0	90	120	70	0.49	0.69	4.46	0	0	1	0	0	1	7	3	0	0	0	0	1	0	0	0	1
1	1	0	0	0	0	39.06	0	92	116	72	1.08	0.52	4.57	0	0	0	0	0	1	7	2	0	0	0	0	1	0	0	0	1
1	1	0	0	0	0	29.11	0	95	120	80	1.45	0.65	5.2	0	0	0	0	0	1	7	2	0	0	0	0	1	0	0	0	1
1	1	0	0	0	0	57	0	100	120	80	1.6	1.34	5.56	0	0	0	0	0	1	7	2	0	0	0	0	1	0	0	0	1
1	1	0	0	0	0	48	0	97	104	60	1.13	0.79	5.52	0	0	0	0	0	1	7	2	0	0	0	0	1	0	0	0	1
1	1	0	0	0	0	43.08	0	90	120	80	0.86	1.48	6.71	1	0	1	1	0	1	7	4	0	0	0	0	1	0	0	0	1
1	1	0	0	0	0	44.03	0	92	120	70	1.13	0.82	5.98	0	0	0	1	0	1	7	3	0	0	0	0	1	0	0	0	1
1	1	0	0	0	0	38	0	114	120	80	1.26	1.19	5.66	0	0	0	1	0	1	7	3	0	0	0	0	1	0	0	0	1
2	1	0	0	0	0	61.02	0	100	110	80	0.94	1.5	4.34	0	0	1	0	0	1	7	3	0	0	0	0	1	0	0	0	1
2	1	0	0	0	0	37.02	0	92	100	72	1.13	1.12	4.21	0	0	1	0	0	1	7	3	0	0	0	0	1	0	0	0	1
2	1	0	0	0	0	50	0	84	120	80	2	0.93	5.37	0	0	0	0	0	1	7	2	0	0	0	0	1	0	0	0	1
2	1	0	0	0	0	27.04	0	82	116	78	1.69	0.57	3.75	0	0	0	0	0	1	7	2	0	0	0	0	1	0	0	0	1
2	1	0	0	0	0	24.07	0	88	110	50	1.4	0.99	4.27	0	0	0	0	0	1	7	2	0	0	0	0	1	0	0	0	1
2	1	0	0	0	0	34.07	0	95	110	70	1.21	1.03	5.95	1	0	1	1	0	1	7	4	0	0	0	0	1	0	0	0	1
2	1	0	0	0	0	82	0	90	110	80	1.57	0.85	7.45	0	0	0	1	0	1	7	3	0	0	0	0	1	0	0	0	1
2	1	0	0	0	0	43.01	0	82	120	80	1.32	0.59	6.69	0	0	0	1	0	1	7	3	0	0	0	0	1	0	0	0	1
2	1	0	0	0	0	51.04	0	82	100	70	1.25	1.32	4.37	1	1	1	0	0	1	7	4	0	0	0	0	1	0	0	0	1
2	1	0	0	0	0	47	0	82	120	70	0.55	3.81	5.58	1	1	1	0	0	1	7	4	0	0	0	0	1	0	0	0	1
2	1	0	0	0	0	37.04	0	88	100	70	1.06	6.4	4.68	1	1	1	0	0	1	7	4	0	0	0	0	1	0	0	0	1
2	1	0	0	0	0	57	0	88	120	60	1.46	1.91	4.86	0	1	0	0	0	1	7	3	0	0	0	0	1	0	0	0	1
2	1	0	0	0	1	45.02	0	81	129	84	0.88	0.73	4.64	0	0	1	0	0	1	7	3	0	0	0	0	1	0	0	0	1
2	1	0	0	0	1	48	0	85	100	70	0.64	2.81	5.02	1	1	1	0	0	1	7	4	0	0	0	0	1	0	0	0	1
1	1	1	0	0	0	35.1	0	70	124	83	2.34	0.83	5.05	0	0	0	0	0	0	1	1	0	0	0	0	0	0	0	0	0
1	1	1	0	0	0	27.02	0	81	124	84	1.5	1.04	5.22	0	0	0	0	0	0	1	1	0	0	0	0	0	0	0	0	0
1	1	1	0	0	0	46.1	0	84	119	76	1.4	0.89	4.95	0	0	0	0	0	0	1	1	0	0	0	0	0	0	0	0	0
1	1	1	0	0	0	39.08	0	74	118	84	1.17	0.82	4.82	0	0	0	0	0	0	1	1	0	0	0	0	0	0	0	0	0
1	1	1	0	0	0	36.08	0	79	116	70	1.29	0.7	5	0	0	0	0	0	0	1	1	0	0	0	0	0	0	0	0	0
1	1	1	0	0	0	48.09	0	82	129	69	1.55	0.83	7.8	0	0	0	1	0	0	7	7	0	0	0	0	0	0	0	0	0
1	1	1	0	0	0	55.11	0	78	126	63	1.11	0.89	8.59	0	0	0	1	0	0	7	7	0	0	0	0	0	0	0	0	0
1	1	1	0	0	0	47.11	0	80	110	84	1.56	1.06	5.65	0	0	0	1	0	0	7	7	0	0	0	0	0	0	0	0	0
1	1	1	0	0	0	31.11	0	80	129	78	1.34	1.32	5.6	0	0	0	1	0	0	7	7	0	0	0	0	0	0	0	0	0
1	1	1	0	0	0	48.04	0	88	120	84	1.13	0.84	6.43	0	0	0	1	0	0	7	7	0	0	0	0	0	0	0	0	0
1	1	1	0	0	0	41.06	0	88.6	117.5	80	1.24	0.78	5.48	0	1	1	0	0	0	7	7	0	0	0	0	0	0	0	0	0
2	1	1	0	0	0	49.03	0	70	90	66	1.24	0.6	4.76	0	0	1	0	0	0	7	7	0	0	0	0	0	0	0	0	0
1	1	1	0	0	0	33.01	0	114	120	78	1.03	2.83	4.35	1	1	1	0	0	1	7	4	0	0	0	0	1	0	0	0	1
2	1	1	0	0	0	51.01	0	95	117	79	2.04	0.65	3.95	0	0	0	0	0	1	7	2	0	0	0	0	1	0	0	0	1
1	1	1	0	0	0	44.09	0	94	126	80	1.17	2.55	7.94	1	1	0	1	0	1	7	4	0	0	0	0	1	0	0	0	1
1	1	1	0	0	0	27	0	73	120	70	0.94	0.93	5.24	0	0	1	0	0	0	7	7	0	0	0	0	0	0	0	0	0
1	1	1	0	0	0	45	0	75	124	70	1	0.91	5.43	0	0	1	0	0	0	7	7	0	0	0	0	0	0	0	0	0
1	1	1	0	0	0	40	0	89	120	70	0.87	0.6	4.02	0	0	1	0	0	0	7	7	0	0	0	0	0	0	0	0	0
1	1	1	0	0	0	37.1	0	85	108	66	2.51	1	4.78	0	0	0	0	0	0	1	1	0	0	0	0	0	0	0	0	0
1	1	1	0	0	0	52.09	0	83	124	82	1.22	1.24	4.91	0	0	0	0	0	0	1	1	0	0	0	0	0	0	0	0	0
1	1	1	0	0	0	66	0	87	125	80	1.24	0.89	4.64	0	0	0	0	0	0	1	1	0	0	0	0	0	0	0	0	0
1	1	1	0	0	0	30.1	0	75	128	80	1.36	0.94	6.84	0	0	0	1	0	0	7	7	0	0	0	0	0	0	0	0	0
1	1	1	0	0	0	41.05	0	70	112	77	1.07	1.49	5.93	0	0	0	1	0	0	7	7	0	0	0	0	0	0	0	0	0
1	1	1	0	0	0	40.02	0	76	120	80	1.08	0.49	6.22	0	0	0	1	0	0	7	7	0	0	0	0	0	0	0	0	0
1	1	1	0	0	0	40.1	0	80	100	70	0.9	5.1	4.63	0	1	1	0	0	0	7	7	0	0	0	0	0	0	0	0	0
1	1	1	0	0	0	41.08	0	98	120	70	0.97	0.98	8.7	1	0	1	1	0	1	7	4	0	0	0	0	1	0	0	0	1
2	1	1	0	0	0	36	0	83	109	70	0.88	1.41	3.64	1	1	1	0	0	1	7	4	0	0	0	0	1	0	0	0	1
1	0	0	0	0	0	26.09	0	71	108	64	0.98	0.87	4.38	0	0	1	0	0	0	7	7	0	0	0	0	0	0	0	0	0
1	0	0	0	0	0	37.06	0	87	124	76	0.99	1.12	4.21	0	0	1	0	0	0	7	7	0	0	0	0	0	0	0	0	0
1	0	0	0	0	0	35.1	0	67	111	79	0.84	0.7	3.9	0	0	1	0	0	0	7	7	0	0	0	0	0	0	0	0	0
1	0	0	0	0	0	38.05	0	70	129	81	0.82	0.55	5.3	0	0	1	0	0	0	7	7	0	0	0	0	0	0	0	0	0
2	0	0	0	1	0	55.11	0	68	124	75	1.12	0.66	4.63	0	0	1	0	0	0	7	7	0	0	0	0	0	0	0	0	0
1	0	0	0	0	0	30.1	0	70	95	71	1.67	0.8	5.08	0	0	0	0	0	0	1	1	0	0	0	0	0	0	0	0	0
1	0	0	0	0	0	30.03	0	77	106	70	1.93	0.62	4.35	0	0	0	0	0	0	1	1	0	0	0	0	0	0	0	0	0
1	0	0	0	0	0	22.04	0	74	122.5	77.5	1.66	1.31	4.65	0	0	0	0	0	0	1	1	0	0	0	0	0	0	0	0	0
1	0	0	0	0	0	32.05	0	82	120	70	1.57	0.71	3.9	0	0	0	0	0	0	1	1	0	0	0	0	0	0	0	0	0
1	0	0	0	0	0	24.02	0	83	120	80	1.75	0.77	4.52	0	0	0	0	0	0	1	1	0	0	0	0	0	0	0	0	0
1	0	0	0	0	0	31.01	0	80.5	98	70	1.67	1.11	5	0	0	0	0	0	0	1	1	0	0	0	0	0	0	0	0	0
1	0	0	0	0	0	32.04	0	79.5	106	69	2.12	0.87	5.2	0	0	0	0	0	0	1	1	0	0	0	0	0	0	0	0	0
1	0	0	0	0	0	36.04	0	78	100	70	1.85	1.01	5.4	0	0	0	0	0	0	1	1	0	0	0	0	0	0	0	0	0
1	0	0	0	0	0	50.01	0	85	120	75	1.6	0.71	5.3	0	0	0	0	0	0	1	1	0	0	0	0	0	0	0	0	0
1	0	0	0	0	0	59.08	0	85	91	64	1.69	1.35	4.8	0	0	0	0	0	0	1	1	0	0	0	0	0	0	0	0	0
1	0	0	0	0	0	24.01	0	71	122	60	1.44	0.68	4.62	0	0	0	0	0	0	1	1	0	0	0	0	0	0	0	0	0
1	0	0	0	0	0	33.09	0	83	127	81	1.31	0.81	4.77	0	0	0	0	0	0	1	1	0	0	0	0	0	0	0	0	0
1	0	0	0	0	0	30.1	0	62	120	80	1.48	0.37	4.6	0	0	0	0	0	0	1	1	0	0	0	0	0	0	0	0	0
1	0	0	0	0	0	26.02	0	65	120	80	1.31	1.68	4.15	0	0	0	0	0	0	1	1	0	0	0	0	0	0	0	0	0
1	0	0	0	0	0	35.03	0	88	102	79	1.3	0.56	4.8	0	0	0	0	0	0	1	1	0	0	0	0	0	0	0	0	0
1	0	0	0	0	0	32.04	0	83	126	84	1.26	0.92	5.32	0	0	0	0	0	0	1	1	0	0	0	0	0	0	0	0	0
1	0	0	0	0	0	25.01	0	77	91	63	1.1	0.83	4.3	0	0	0	0	0	0	1	1	0	0	0	0	0	0	0	0	0
1	0	0	0	0	0	29.02	0	78	88	64	1.29	0.67	4.2	0	0	0	0	0	0	1	1	0	0	0	0	0	0	0	0	0
1	0	0	0	0	0	23.04	0	78	117	78	1.07	1.6	4.7	0	0	0	0	0	0	1	1	0	0	0	0	0	0	0	0	0
1	0	0	0	0	0	27.01	0	74	110	78	1.19	0.5	4.02	0	0	0	0	0	0	1	1	0	0	0	0	0	0	0	0	0
1	0	0	0	0	0	32.01	0	77.4	118	75	1.05	1.25	4.29	0	0	0	0	0	0	1	1	0	0	0	0	0	0	0	0	0
1	0	0	0	0	0	21.02	0	73	94	60	1.15	0.53	4.41	0	0	0	0	0	0	1	1	0	0	0	0	0	0	0	0	0
1	0	0	0	0	0	23.11	0	64	118	80	1.24	0.73	3.92	0	0	0	0	0	0	1	1	0	0	0	0	0	0	0	0	0
1	0	0	0	0	0	26.11	0	81	110	75	1.26	1.19	4.08	0	0	0	0	0	0	1	1	0	0	0	0	0	0	0	0	0
1	0	0	0	0	0	30.02	0	77	122	70	1.62	0.79	5.3	0	0	0	0	0	0	1	1	0	0	0	0	0	0	0	0	0
1	0	0	0	0	0	24	0	74	91	70	1.62	0.36	5.09	0	0	0	0	0	0	1	1	0	0	0	0	0	0	0	0	0
1	0	0	0	0	0	26.01	0	68	100	68	2.09	0.53	4.57	0	0	0	0	0	0	1	1	0	0	0	0	0	0	0	0	0
1	0	0	0	0	0	39.01	0	83	128	78	1.09	0.88	4.19	0	0	0	0	0	0	1	1	0	0	0	0	0	0	0	0	0
1	0	0	0	0	0	36.08	0	80.4	119	79	1.29	1.42	4.9	0	0	0	0	0	0	1	1	0	0	0	0	0	0	0	0	0
1	0	0	0	0	0	38.07	0	77.2	97	50	1.67	1.51	4.8	0	0	0	0	0	0	1	1	0	0	0	0	0	0	0	0	0
1	0	0	0	0	0	45.1	0	75	111	60	2.04	0.72	4.9	0	0	0	0	0	0	1	1	0	0	0	0	0	0	0	0	0
1	0	0	0	0	0	45.07	0	69	129	71	2.53	0.52	4.17	0	0	0	0	0	0	1	1	0	0	0	0	0	0	0	0	0
1	0	0	0	0	0	55.01	0	82	129	83	1.3	0.62	4.34	0	0	0	0	0	0	1	1	0	0	0	0	0	0	0	0	0
1	0	0	0	0	0	55.11	0	88	128	84	1.09	1.09	5.06	0	0	0	0	0	0	1	1	0	0	0	0	0	0	0	0	0
1	0	0	0	0	0	25.11	0	81	112	84	1	0.81	7.24	0	0	1	1	0	0	7	7	0	0	0	0	0	0	0	0	0
1	0	0	0	0	0	24.02	0	75	120	70	0.97	0.76	6.48	0	0	1	1	0	0	7	7	0	0	0	0	0	0	0	0	0
1	0	0	0	0	0	57.04	0	77	126	80	1.65	1.57	7.52	0	0	0	1	0	0	7	7	0	0	0	0	0	0	0	0	0
1	0	0	0	0	0	30.11	0	71	110	50	1.31	1.22	5.65	0	0	0	1	0	0	7	7	0	0	0	0	0	0	0	0	0
1	0	0	0	0	0	45.06	0	82	121	79	1.33	0.93	5.7	0	0	0	1	0	0	7	7	0	0	0	0	0	0	0	0	0
1	0	0	0	0	0	30.11	0	70	124	77	2.33	0.67	5.68	0	0	0	1	0	0	7	7	0	0	0	0	0	0	0	0	0
1	0	0	0	0	0	21.1	0	72	110	65	1.7	0.8	5.6	0	0	0	1	0	0	7	7	0	0	0	0	0	0	0	0	0
1	0	0	0	0	0	35.06	0	79	109	70	1.8	0.52	5.6	0	0	0	1	0	0	7	7	0	0	0	0	0	0	0	0	0
1	0	0	0	0	0	31.1	0	85	129	81	1.2	0.56	5.7	0	0	0	1	0	0	7	7	0	0	0	0	0	0	0	0	0
1	0	0	0	0	0	38.09	0	68	107	78	1.04	1.17	5.3	0	1	1	0	0	0	7	7	0	0	0	0	0	0	0	0	0
1	0	0	0	0	0	28.06	0	80	124	70	1.25	1.97	4.26	0	1	0	0	0	0	7	7	0	0	0	0	0	0	0	0	0
1	0	0	0	0	0	25.07	0	83	125	77	1.19	2.58	3.33	0	1	0	0	0	0	7	7	0	0	0	0	0	0	0	0	0
2	0	0	0	0	0	31.07	0	58	103	77	1.22	0.54	3.61	0	0	1	0	0	0	7	7	0	0	0	0	0	0	0	0	0
2	0	0	0	0	0	30.06	0	73	121	71	1.25	0.76	5.1	0	0	1	0	0	0	7	7	0	0	0	0	0	0	0	0	0
2	0	0	0	0	0	26.03	0	69	90	60	1.22	0.62	4.96	0	0	1	0	0	0	7	7	0	0	0	0	0	0	0	0	0
2	0	0	0	0	0	27.07	0	66	122	75	1.21	0.58	5.1	0	0	1	0	0	0	7	7	0	0	0	0	0	0	0	0	0
2	0	0	0	0	0	25.09	0	72	117.5	66	1.16	0.67	5.14	0	0	1	0	0	0	7	7	0	0	0	0	0	0	0	0	0
2	0	0	0	0	0	23.1	0	76	114	72	1.28	0.74	4.88	0	0	1	0	0	0	7	7	0	0	0	0	0	0	0	0	0
2	0	0	0	0	0	22.06	0	76	106	52	1.1	0.81	4.41	0	0	1	0	0	0	7	7	0	0	0	0	0	0	0	0	0
2	0	0	0	0	0	23.11	0	77	118	72	1.2	1.37	3.45	0	0	1	0	0	0	7	7	0	0	0	0	0	0	0	0	0
2	0	0	0	0	0	33.02	0	64	88	68	1.27	1.18	3.39	0	0	1	0	0	0	7	7	0	0	0	0	0	0	0	0	0
2	0	0	0	0	0	30.07	0	74	110	70	1.25	0.66	3.75	0	0	1	0	0	0	7	7	0	0	0	0	0	0	0	0	0
2	0	0	0	0	0	39.1	0	79	120	76	1.25	0.76	5.52	0	0	1	0	0	0	7	7	0	0	0	0	0	0	0	0	0
2	0	0	0	0	0	41.08	0	78	116	78	1.06	0.83	4.62	0	0	1	0	0	0	7	7	0	0	0	0	0	0	0	0	0
2	0	0	0	0	0	45.03	0	77	106	59	1.25	0.55	3.6	0	0	1	0	0	0	7	7	0	0	0	0	0	0	0	0	0
2	0	0	0	0	0	46.07	0	72	127	78	1.12	0.9	5.43	0	0	1	0	0	0	7	7	0	0	0	0	0	0	0	0	0
2	0	0	0	0	0	22.03	0	78	109	83	1.1	0.56	5	0	0	1	0	0	0	7	7	0	0	0	0	0	0	0	0	0
2	0	0	0	0	0	33.06	0	74	123	82	1.09	0.69	3.55	0	0	1	0	0	0	7	7	0	0	0	0	0	0	0	0	0
2	0	0	0	0	0	30.04	0	72	110	80	1.12	0.79	3.23	0	0	1	0	0	0	7	7	0	0	0	0	0	0	0	0	0
2	0	0	0	0	0	29.05	0	70	100	70	0.99	0.77	5.4	0	0	1	0	0	0	7	7	0	0	0	0	0	0	0	0	0
2	0	0	0	0	0	24.04	0	70	109	72.5	0.89	0.89	4.9	0	0	1	0	0	0	7	7	0	0	0	0	0	0	0	0	0
2	0	0	0	0	0	29.04	0	72	120	72	0.99	0.52	3.83	0	0	1	0	0	0	7	7	0	0	0	0	0	0	0	0	0
2	0	0	0	0	0	27.1	0	73	126	75	1	0.44	4.02	0	0	1	0	0	0	7	7	0	0	0	0	0	0	0	0	0
2	0	0	0	0	0	21.09	0	77	110	69	0.96	0.89	4.51	0	0	1	0	0	0	7	7	0	0	0	0	0	0	0	0	0
2	0	0	0	0	0	26.04	0	67	100	66	0.98	0.8	4.46	0	0	1	0	0	0	7	7	0	0	0	0	0	0	0	0	0
2	0	0	0	0	0	22.09	0	70	118	70	1	0.93	4.97	0	0	1	0	0	0	7	7	0	0	0	0	0	0	0	0	0
2	0	0	0	0	0	24.11	0	64	116	68	1.75	0.74	3.7	0	0	0	0	0	0	1	1	0	0	0	0	0	0	0	0	0
2	0	0	0	0	0	30	0	76	110	78	1.68	1.04	4.2	0	0	0	0	0	0	1	1	0	0	0	0	0	0	0	0	0
2	0	0	0	0	0	27.02	0	73	108	52	2.05	0.78	4.87	0	0	0	0	0	0	1	1	0	0	0	0	0	0	0	0	0
2	0	0	0	0	0	33	0	77	108	70	1.96	0.92	5.13	0	0	0	0	0	0	1	1	0	0	0	0	0	0	0	0	0
2	0	0	0	0	0	34.08	0	72	105	71	1.62	0.76	4.55	0	0	0	0	0	0	1	1	0	0	0	0	0	0	0	0	0
2	0	0	0	0	0	31.08	0	76	120	70	2.06	0.69	5.06	0	0	0	0	0	0	1	1	0	0	0	0	0	0	0	0	0
2	0	0	0	0	0	32.1	0	79	119	79	2.42	0.61	5	0	0	0	0	0	0	1	1	0	0	0	0	0	0	0	0	0
2	0	0	0	0	0	34.09	0	78	117	70	1.56	0.54	4.7	0	0	0	0	0	0	1	1	0	0	0	0	0	0	0	0	0
2	0	0	0	0	0	30.01	0	44	115	75	1.93	0.74	5.3	0	0	0	0	0	0	1	1	0	0	0	0	0	0	0	0	0
2	0	0	0	0	0	32	0	66	118	76	1.9	0.45	4.96	0	0	0	0	0	0	1	1	0	0	0	0	0	0	0	0	0
2	0	0	0	0	0	31.09	0	64	102	68	1.81	0.84	4.53	0	0	0	0	0	0	1	1	0	0	0	0	0	0	0	0	0
2	0	0	0	0	0	32.07	0	69	98	63	1.64	1.07	5.3	0	0	0	0	0	0	1	1	0	0	0	0	0	0	0	0	0
2	0	0	0	0	0	35.09	0	66	116	70	1.56	0.62	4.6	0	0	0	0	0	0	1	1	0	0	0	0	0	0	0	0	0
2	0	0	0	0	0	35.07	0	75	110	70	1.68	0.43	4.6	0	0	0	0	0	0	1	1	0	0	0	0	0	0	0	0	0
2	0	0	0	0	0	35.06	0	73	104	72	1.82	0.68	4.9	0	0	0	0	0	0	1	1	0	0	0	0	0	0	0	0	0
2	0	0	0	0	0	38.1	0	78	127	70	1.62	0.75	5.2	0	0	0	0	0	0	1	1	0	0	0	0	0	0	0	0	0
2	0	0	0	0	0	37.1	0	74	127	77	1.67	1.13	5.01	0	0	0	0	0	0	1	1	0	0	0	0	0	0	0	0	0
2	0	0	0	0	0	36.09	0	73	101	68	1.57	0.36	5.2	0	0	0	0	0	0	1	1	0	0	0	0	0	0	0	0	0
2	0	0	0	0	0	39.09	0	78	120	71	1.78	1.06	4.57	0	0	0	0	0	0	1	1	0	0	0	0	0	0	0	0	0
2	0	0	0	0	0	40.1	0	76	108	76	1.69	0.44	5.05	0	0	0	0	0	0	1	1	0	0	0	0	0	0	0	0	0
2	0	0	0	0	0	43.01	0	61	108	70	2.2	0.5	3.74	0	0	0	0	0	0	1	1	0	0	0	0	0	0	0	0	0
2	0	0	0	0	0	43.03	0	72	111	71	1.61	0.81	3.11	0	0	0	0	0	0	1	1	0	0	0	0	0	0	0	0	0
2	0	0	0	0	0	46.09	0	63	112	76	1.82	0.69	4.44	0	0	0	0	0	0	1	1	0	0	0	0	0	0	0	0	0
2	0	0	0	0	0	46.03	0	72	98	70	1.86	0.61	5.2	0	0	0	0	0	0	1	1	0	0	0	0	0	0	0	0	0
2	0	0	0	0	0	63.03	0	72	118	78	2.16	0.79	4.42	0	0	0	0	0	0	1	1	0	0	0	0	0	0	0	0	0
2	0	0	0	0	0	32.08	0	70	116	80	1.75	0.66	3.81	0	0	0	0	0	0	1	1	0	0	0	0	0	0	0	0	0
2	0	0	0	0	0	25.03	0	70	109	72	1.46	0.47	5.22	0	0	0	0	0	0	1	1	0	0	0	0	0	0	0	0	0
2	0	0	0	0	0	34.02	0	71.8	122	76	1.43	0.56	4.61	0	0	0	0	0	0	1	1	0	0	0	0	0	0	0	0	0
2	0	0	0	0	0	26.08	0	70	114	68	1.43	0.45	4.93	0	0	0	0	0	0	1	1	0	0	0	0	0	0	0	0	0
2	0	0	0	0	0	26.01	0	71	106	78	1.45	0.47	4.88	0	0	0	0	0	0	1	1	0	0	0	0	0	0	0	0	0
2	0	0	0	0	0	30.11	0	64	102	50	1.33	0.79	2.96	0	0	0	0	0	0	1	1	0	0	0	0	0	0	0	0	0
2	0	0	0	0	0	22.05	0	78.5	121	76	1.37	0.81	4.5	0	0	0	0	0	0	1	1	0	0	0	0	0	0	0	0	0
2	0	0	0	0	0	34.07	0	73	110	70	1.42	0.42	3.65	0	0	0	0	0	0	1	1	0	0	0	0	0	0	0	0	0
2	0	0	0	0	0	26.03	0	69	117	75	1.49	0.88	5.06	0	0	0	0	0	0	1	1	0	0	0	0	0	0	0	0	0
2	0	0	0	0	0	20.05	0	74	124.5	80	1.81	0.93	5.2	0	0	0	0	0	0	1	1	0	0	0	0	0	0	0	0	0
2	0	0	0	0	0	38.05	0	68	108	79	1.5	0.89	4.35	0	0	0	0	0	0	1	1	0	0	0	0	0	0	0	0	0
2	0	0	0	0	0	38.06	0	71	115	77.5	1.41	0.8	4.15	0	0	0	0	0	0	1	1	0	0	0	0	0	0	0	0	0
2	0	0	0	0	0	38.03	0	79	120	84	2.02	0.47	5.54	0	0	0	0	0	0	1	1	0	0	0	0	0	0	0	0	0
2	0	0	0	0	0	41.06	0	78	98	70	1.31	0.44	5.1	0	0	0	0	0	0	1	1	0	0	0	0	0	0	0	0	0
2	0	0	0	0	0	53.03	0	69	122	77	1.34	0.81	4.23	0	0	0	0	0	0	1	1	0	0	0	0	0	0	0	0	0
2	0	0	0	0	0	33.07	0	79.6	124	84	1.55	0.58	4.75	0	0	0	0	0	0	1	1	0	0	0	0	0	0	0	0	0
2	0	0	0	0	0	33.09	0	65	111	83	1.38	0.52	3.37	0	0	0	0	0	0	1	1	0	0	0	0	0	0	0	0	0
2	0	0	0	0	0	39.06	0	62	124	80	1.44	1	4.73	0	0	0	0	0	0	1	1	0	0	0	0	0	0	0	0	0
2	0	0	0	0	0	43.02	0	79	129	83	1.55	0.63	5.09	0	0	0	0	0	0	1	1	0	0	0	0	0	0	0	0	0
2	0	0	0	0	0	43.11	0	61	119	82	1.37	0.91	5.08	0	0	0	0	0	0	1	1	0	0	0	0	0	0	0	0	0
1	0	0	0	0	1	44.04	0	77	111	77	1.55	0.76	4.8	0	0	0	0	0	0	1	1	0	0	0	0	0	0	0	0	0
1	0	0	0	0	1	33.1	0	71	128	70	1.15	0.73	4.29	0	0	0	0	0	0	1	1	0	0	0	0	0	0	0	0	0
1	0	0	0	0	1	28.09	0	70	110	50	1.57	0.46	4.82	0	0	0	0	0	0	1	1	0	0	0	0	0	0	0	0	0
1	0	0	0	0	0	46.09	0	70	122	79	1.59	3.02	6.4	0	1	0	1	0	0	7	7	0	0	0	0	0	0	0	0	0
2	0	0	0	0	0	27.06	0	79.2	118	76	1.09	0.74	6.31	0	0	1	1	0	0	7	7	0	0	0	0	0	0	0	0	0
2	0	0	0	0	0	34.06	0	75	120	83	1.21	1.02	6.3	0	0	1	1	0	0	7	7	0	0	0	0	0	0	0	0	0
2	0	0	0	0	0	31.07	0	70	118	80	1.22	0.54	5.85	0	0	1	1	0	0	7	7	0	0	0	0	0	0	0	0	0
2	0	0	0	0	0	34.1	0	65	96	65	2.01	0.62	7.63	0	0	0	1	0	0	7	7	0	0	0	0	0	0	0	0	0
2	0	0	0	0	0	34.09	0	75	118	78	1.85	0.84	6.5	0	0	0	1	0	0	7	7	0	0	0	0	0	0	0	0	0
2	0	0	0	0	0	33.03	0	76	100	75.5	2.05	0.85	5.9	0	0	0	1	0	0	7	7	0	0	0	0	0	0	0	0	0
2	0	0	0	0	0	38.09	0	78	129	79	1.6	0.97	6.07	0	0	0	1	0	0	7	7	0	0	0	0	0	0	0	0	0
2	0	0	0	0	0	39.02	0	70	113	73	1.83	0.81	5.7	0	0	0	1	0	0	7	7	0	0	0	0	0	0	0	0	0
2	0	0	0	0	0	37.03	0	78.6	114	75	2.5	0.74	6.6	0	0	0	1	0	0	7	7	0	0	0	0	0	0	0	0	0
2	0	0	0	0	0	32.1	0	79	116	80	1.69	0.47	5.7	0	0	0	1	0	0	7	7	0	0	0	0	0	0	0	0	0
2	0	0	0	0	0	32.1	0	77.5	100	74	1.38	0.8	5.6	0	0	0	1	0	0	7	7	0	0	0	0	0	0	0	0	0
2	0	0	0	0	0	39.11	0	72	111	80	1.58	0.49	6.4	0	0	0	1	0	0	7	7	0	0	0	0	0	0	0	0	0
2	0	0	0	0	0	37.1	0	78	87	48	1.55	0.54	5.8	0	0	0	1	0	0	7	7	0	0	0	0	0	0	0	0	0
2	0	0	0	0	0	36.02	0	77	121	80	1.89	1.21	5.6	0	0	0	1	0	0	7	7	0	0	0	0	0	0	0	0	0
2	0	0	0	0	0	40.09	0	63	116	84	2.16	0.43	5.6	0	0	0	1	0	0	7	7	0	0	0	0	0	0	0	0	0
2	0	0	0	0	0	43.01	0	79	124	80	2.2	1.07	5.91	0	0	0	1	0	0	7	7	0	0	0	0	0	0	0	0	0
2	0	0	0	0	0	49.03	0	74.2	125	70	1.71	1.11	4.56	0	1	1	0	0	0	7	7	0	0	0	0	0	0	0	0	0
2	0	0	0	0	0	25.11	0	71	120	65	1.18	2.02	4.99	0	1	1	0	0	0	7	7	0	0	0	0	0	0	0	0	0
2	0	0	0	0	0	26.09	0	73	110	58	1.56	1.79	3.91	0	1	0	0	0	0	7	7	0	0	0	0	0	0	0	0	0
2	0	0	0	0	0	30.05	0	75	109	70	2.07	1.71	3.36	0	1	0	0	0	0	7	7	0	0	0	0	0	0	0	0	0
2	0	0	0	0	0	49.09	0	68	110	76	2.56	3.02	5.52	0	1	0	0	0	0	7	7	0	0	0	0	0	0	0	0	0
2	0	0	0	0	0	33.03	0	74	120	80	1.3	2.93	5.32	0	1	0	0	0	0	7	7	0	0	0	0	0	0	0	0	0
2	0	0	0	0	1	23.1	0	65	94	50	1.05	0.76	4.17	0	0	1	0	0	0	7	7	0	0	0	0	0	0	0	0	0
2	0	0	0	0	1	29.11	0	78	118	78	1.07	0.72	4.75	0	0	1	0	0	0	7	7	0	0	0	0	0	0	0	0	0
2	0	0	0	0	1	25.1	0	76	126	84	1.19	0.75	3.75	0	0	1	0	0	0	7	7	0	0	0	0	0	0	0	0	0
2	0	0	0	0	1	23	0	75	120	76	0.84	1.34	4.4	0	0	1	0	0	0	7	7	0	0	0	0	0	0	0	0	0
1	0	0	0	0	0	45.07	0	92	110	72	1.62	1	4.92	0	0	0	0	0	1	7	2	0	0	0	0	1	0	0	0	1
1	0	0	0	0	0	44	0	90	114	80	1.24	0.67	4.76	0	0	0	0	0	1	7	2	0	0	0	0	1	0	0	0	1
1	0	0	0	0	0	46.1	0	98.8	107	69	1.24	0.75	5.4	0	0	0	0	0	1	7	2	0	0	0	0	1	0	0	0	1
2	0	0	0	0	1	34.01	0	70	106	72	1.38	0.61	4.82	0	0	0	0	0	0	1	1	0	0	0	0	0	0	0	0	0
2	0	0	0	0	1	23	0	73	121	60	1.31	0.77	5.2	0	0	0	0	0	0	1	1	0	0	0	0	0	0	0	0	0
2	0	0	0	0	1	45.09	0	74	122	82	1.3	0.74	3.5	0	0	0	0	0	0	1	1	0	0	0	0	0	0	0	0	0
2	0	0	0	0	0	26.11	0	74	103	66	1.48	1.94	7.17	0	1	0	1	0	0	7	7	0	0	0	0	0	0	0	0	0
2	0	0	0	0	0	30.03	0	78	115	75	2.31	2.28	5.69	0	1	0	1	0	0	7	7	0	0	0	0	0	0	0	0	0
1	0	0	0	0	0	41.08	0	103	125	80	1.09	1	6.83	0	0	0	1	0	1	7	3	0	0	0	0	1	0	0	0	1
1	0	0	0	0	0	44.03	0	107	120	80	1.14	2.78	5.14	0	1	0	0	0	1	7	3	0	0	0	0	1	0	0	0	1
2	0	0	0	0	1	25.11	0	67	98	68	2.12	1.97	3.26	0	1	0	0	0	0	7	7	0	0	0	0	0	0	0	0	0
2	0	0	0	0	0	30.07	0	81	106	74	1.25	0.68	4.65	0	0	1	0	0	1	7	3	0	0	0	0	1	0	0	0	1
2	0	0	0	0	0	37.02	0	80	114	79	1.12	1.02	5.23	0	0	1	0	0	1	7	3	0	0	0	0	1	0	0	0	1
2	0	0	0	0	0	35.03	0	82.1	117	76	1.29	0.68	4.8	0	0	1	0	0	1	7	3	0	0	0	0	1	0	0	0	1
2	0	0	0	0	0	43.11	0	83	124	78	0.95	0.54	4.43	0	0	1	0	0	1	7	3	0	0	0	0	1	0	0	0	1
2	0	0	0	0	0	42.05	0	80	111	71	1.02	0.79	4.19	0	0	1	0	0	1	7	3	0	0	0	0	1	0	0	0	1
2	0	0	0	0	0	32.11	0	80	113	80	1.14	0.71	4.8	0	0	1	0	0	1	7	3	0	0	0	0	1	0	0	0	1
2	0	0	0	0	0	33.11	0	80	113	63	1.02	0.44	4.7	0	0	1	0	0	1	7	3	0	0	0	0	1	0	0	0	1
2	0	0	0	0	0	32.09	0	87	110	79	1.17	0.69	4.36	0	0	1	0	0	1	7	3	0	0	0	0	1	0	0	0	1
2	0	0	0	0	0	40.01	0	94	111	75	1.21	0.73	4.7	0	0	1	0	0	1	7	3	0	0	0	0	1	0	0	0	1
2	0	0	0	0	0	47.07	0	90	110	75	1.08	0.81	4.84	0	0	1	0	0	1	7	3	0	0	0	0	1	0	0	0	1
2	0	0	0	0	0	50.08	0	100	120	80	1	0.75	5.08	0	0	1	0	0	1	7	3	0	0	0	0	1	0	0	0	1
2	0	0	0	0	0	30.09	0	98.1	109	59	1.2	0.98	4.01	0	0	1	0	0	1	7	3	0	0	0	0	1	0	0	0	1
2	0	0	0	0	0	35.03	0	96	110	75	1.19	1.03	4.62	0	0	1	0	0	1	7	3	0	0	0	0	1	0	0	0	1
1	0	0	0	0	1	48.11	0	104	109	80	0.89	1.46	4.6	0	0	1	0	0	1	7	3	0	0	0	0	1	0	0	0	1
2	0	0	0	0	0	57.09	0	80	112.5	60	1.9	0.97	5.5	0	0	0	0	0	1	7	2	0	0	0	0	1	0	0	0	1
2	0	0	0	0	0	40.1	0	80.4	122	72	1.98	0.38	4.82	0	0	0	0	0	1	7	2	0	0	0	0	1	0	0	0	1
2	0	0	0	0	0	42.06	0	81	120	70	1.92	1.21	4.32	0	0	0	0	0	1	7	2	0	0	0	0	1	0	0	0	1
2	0	0	0	0	0	25.09	0	80	90	56	1.96	1.07	3.54	0	0	0	0	0	1	7	2	0	0	0	0	1	0	0	0	1
2	0	0	0	0	0	32.09	0	80.3	119	59	1.81	0.87	5	0	0	0	0	0	1	7	2	0	0	0	0	1	0	0	0	1
2	0	0	0	0	0	37.05	0	81	107	75	1.83	0.6	5.2	0	0	0	0	0	1	7	2	0	0	0	0	1	0	0	0	1
2	0	0	0	0	0	39.11	0	81	115	70	1.58	1.08	5.04	0	0	0	0	0	1	7	2	0	0	0	0	1	0	0	0	1
2	0	0	0	0	0	42.02	0	80	125	81	1.82	0.38	5.1	0	0	0	0	0	1	7	2	0	0	0	0	1	0	0	0	1
2	0	0	0	0	0	44.01	0	80	125	80	1.63	0.83	4.14	0	0	0	0	0	1	7	2	0	0	0	0	1	0	0	0	1
2	0	0	0	0	0	42.06	0	80	120	76	1.48	1.15	4.54	0	0	0	0	0	1	7	2	0	0	0	0	1	0	0	0	1
2	0	0	0	0	0	54.02	0	86	108.5	68	1.83	0.81	4.9	0	0	0	0	0	1	7	2	0	0	0	0	1	0	0	0	1
2	0	0	0	0	0	29.04	0	83	112	82	1.72	0.64	4.04	0	0	0	0	0	1	7	2	0	0	0	0	1	0	0	0	1
2	0	0	0	0	0	29.11	0	82	113	75	1.49	0.47	4.8	0	0	0	0	0	1	7	2	0	0	0	0	1	0	0	0	1
2	0	0	0	0	0	24.11	0	84	117	74	1.52	0.69	4.9	0	0	0	0	0	1	7	2	0	0	0	0	1	0	0	0	1
2	0	0	0	0	0	38.07	0	81	122	82	1.59	0.98	4.16	0	0	0	0	0	1	7	2	0	0	0	0	1	0	0	0	1
2	0	0	0	0	0	41.07	0	83	124	82	1.35	0.76	3.97	0	0	0	0	0	1	7	2	0	0	0	0	1	0	0	0	1
2	0	0	0	0	0	35.02	0	84	120	80	1.55	0.55	5.4	0	0	0	0	0	1	7	2	0	0	0	0	1	0	0	0	1
2	0	0	0	0	0	24.04	0	87	115	79	1.57	0.83	3.96	0	0	0	0	0	1	7	2	0	0	0	0	1	0	0	0	1
2	0	0	0	0	0	33.08	0	86.2	102	61	1.64	0.9	5.5	0	0	0	0	0	1	7	2	0	0	0	0	1	0	0	0	1
2	0	0	0	0	0	39	0	86	121	69.5	1.55	0.47	5.57	0	0	0	0	0	1	7	2	0	0	0	0	1	0	0	0	1
2	0	0	0	0	0	38.1	0	88	120	68	1.38	0.73	5.48	0	0	0	0	0	1	7	2	0	0	0	0	1	0	0	0	1
2	0	0	0	0	0	41.03	0	90	124	82	2.21	0.48	5	0	0	0	0	0	1	7	2	0	0	0	0	1	0	0	0	1
2	0	0	0	0	0	48.07	0	91	120	80	1.91	0.63	5.07	0	0	0	0	0	1	7	2	0	0	0	0	1	0	0	0	1
2	0	0	0	0	0	37.01	0	85	100	80	1.51	0.57	4.5	0	0	0	0	0	1	7	2	0	0	0	0	1	0	0	0	1
2	0	0	0	0	0	36.07	0	93.9	100	71	1.73	1.25	5	0	0	0	0	0	1	7	2	0	0	0	0	1	0	0	0	1
2	0	0	0	0	0	23.09	0	94	118	78	1.49	0.56	5.44	0	0	0	0	0	1	7	2	0	0	0	0	1	0	0	0	1
2	0	0	0	0	0	28.09	0	90	118	76	1.46	0.26	5.35	0	0	0	0	0	1	7	2	0	0	0	0	1	0	0	0	1
2	0	0	0	0	0	30.02	0	106	122	79	1.46	1.06	5.22	0	0	0	0	0	1	7	2	0	0	0	0	1	0	0	0	1
2	0	0	0	0	0	36.01	0	80	124	82	1.2	1.04	6.26	1	0	1	1	0	1	7	4	0	0	0	0	1	0	0	0	1
2	0	0	0	0	0	30.07	0	89	123	67.5	1.09	0.76	5.65	1	0	1	1	0	1	7	4	0	0	0	0	1	0	0	0	1
2	0	0	0	0	0	35.09	0	81.5	117	71	1.46	0.74	5.9	0	0	0	1	0	1	7	3	0	0	0	0	1	0	0	0	1
2	0	0	0	0	0	37.11	0	83	108	78	1.3	0.98	6.66	0	0	0	1	0	1	7	3	0	0	0	0	1	0	0	0	1
2	0	0	0	0	0	47.06	0	84	106	71	1.77	0.86	6.3	0	0	0	1	0	1	7	3	0	0	0	0	1	0	0	0	1
2	0	0	0	0	0	32.04	0	81.2	91	63	1.39	0.5	6.84	0	0	0	1	0	1	7	3	0	0	0	0	1	0	0	0	1
2	0	0	0	0	0	33.05	0	84	110	74	1.55	0.45	6.07	0	0	0	1	0	1	7	3	0	0	0	0	1	0	0	0	1
2	0	0	0	0	0	40.02	0	81	120	81	1.35	0.55	5.7	0	0	0	1	0	1	7	3	0	0	0	0	1	0	0	0	1
2	0	0	0	0	0	43.05	0	85	111	69	1.37	0.64	5.7	0	0	0	1	0	1	7	3	0	0	0	0	1	0	0	0	1
2	0	0	0	0	0	27.1	0	86.5	118	72	1.65	0.44	6.19	0	0	0	1	0	1	7	3	0	0	0	0	1	0	0	0	1
2	0	0	0	0	0	36.04	0	85	125	81	1.46	0.96	5.6	0	0	0	1	0	1	7	3	0	0	0	0	1	0	0	0	1
2	0	0	0	0	0	36.09	0	103	112.5	82.5	1.34	0.89	5.9	0	0	0	1	0	1	7	3	0	0	0	0	1	0	0	0	1
2	0	0	0	0	0	50.06	0	90	120	75	2.05	1.67	4.6	1	1	1	0	0	1	7	4	0	0	0	0	1	0	0	0	1
2	0	0	0	0	0	49.09	0	81.5	121	78	1.57	2.18	5.43	1	1	1	0	0	1	7	4	0	0	0	0	1	0	0	0	1
2	0	0	0	0	0	28.01	0	86	99	60	1.55	2.14	3.65	0	1	0	0	0	1	7	3	0	0	0	0	1	0	0	0	1
2	0	0	0	0	0	24.11	0	85	116	72	1.47	1.71	3.8	0	1	0	0	0	1	7	3	0	0	0	0	1	0	0	0	1
2	0	0	0	0	0	36.01	0	90	110	70	1.92	1.71	5.07	0	1	0	0	0	1	7	3	0	0	0	0	1	0	0	0	1
2	0	0	0	0	1	41.02	0	83	108	80	1.28	1.02	4.75	0	0	1	0	0	1	7	3	0	0	0	0	1	0	0	0	1
2	0	0	0	0	1	40.08	0	83	113	76	0.99	0.87	4.13	0	0	1	0	0	1	7	3	0	0	0	0	1	0	0	0	1
2	0	0	0	0	1	47.07	0	80	126	67	0.98	0.54	4.53	0	0	1	0	0	1	7	3	0	0	0	0	1	0	0	0	1
2	0	0	0	0	1	45.07	0	83	126	78	1.57	0.92	4.75	0	0	0	0	0	1	7	2	0	0	0	0	1	0	0	0	1
2	0	0	0	0	1	38.01	0	85	110	71.5	1.6	0.53	4.4	0	0	0	0	0	1	7	2	0	0	0	0	1	0	0	0	1
2	0	0	0	0	0	61.07	0	85	123	83	1.58	1.84	5.4	1	1	0	1	0	1	7	4	0	0	0	0	1	0	0	0	1
2	0	0	0	0	0	47.09	0	82	123	73	1.99	2.04	6.3	1	1	0	1	0	1	7	4	0	0	0	0	1	0	0	0	1
2	0	0	0	0	0	48.02	0	101	109.5	77.5	1.69	1.79	5.95	1	1	0	1	0	1	7	4	0	0	0	0	1	0	0	0	1
2	0	0	0	0	1	37.04	0	81	126	84	1.39	2.05	5.5	1	1	1	0	0	1	7	4	0	0	0	0	1	0	0	0	1
2	0	0	0	0	1	29.06	0	88	80	56	1.51	2.24	3.94	0	1	0	0	0	1	7	3	0	0	0	0	1	0	0	0	1
2	0	0	0	0	1	46.07	0	81	119	71	1.46	2.13	6.9	1	1	0	1	0	1	7	4	0	0	0	0	1	0	0	0	1
1	0	0	0	0	0	38	0	68	120	70	1.24	0.82	5.13	0	0	1	0	0	0	7	7	0	0	0	0	0	0	0	0	0
1	0	0	0	0	0	23.01	0	82	120	80	0.7	0.76	3.97	0	0	1	0	0	0	7	7	0	0	0	0	0	0	0	0	0
1	0	0	0	0	0	24.04	0	74	110	70	1.02	1.03	5.39	0	0	1	0	0	0	7	7	0	0	0	0	0	0	0	0	0
1	0	0	0	0	0	26	0	71	110	78	0.76	0.46	4.01	0	0	1	0	0	0	7	7	0	0	0	0	0	0	0	0	0
1	0	0	0	0	0	29	0	77	114	73	0.88	0.57	4.18	0	0	1	0	0	0	7	7	0	0	0	0	0	0	0	0	0
1	0	0	0	0	0	27	0	77	100	60	0.75	0.69	3.23	0	0	1	0	0	0	7	7	0	0	0	0	0	0	0	0	0
1	0	0	0	0	0	40	0	76	119	71	0.92	0.81	4.97	0	0	1	0	0	0	7	7	0	0	0	0	0	0	0	0	0
1	0	0	0	0	0	51.11	0	83	120	80	0.75	1.32	4.02	0	0	1	0	0	0	7	7	0	0	0	0	0	0	0	0	0
1	0	0	0	0	0	21	0	70	120	80	0.9	1.23	5.09	0	0	1	0	0	0	7	7	0	0	0	0	0	0	0	0	0
1	0	0	0	0	0	23.1	0	77	116	68	1.6	1.59	5.46	0	0	0	0	0	0	1	1	0	0	0	0	0	0	0	0	0
1	0	0	0	0	0	38.05	0	87	100	70	1.68	1.01	4.57	0	0	0	0	0	0	1	1	0	0	0	0	0	0	0	0	0
1	0	0	0	0	0	37.02	0	78	120	70	1.66	0.77	4.26	0	0	0	0	0	0	1	1	0	0	0	0	0	0	0	0	0
1	0	0	0	0	0	29.08	0	78	110	70	1.42	0.83	4.55	0	0	0	0	0	0	1	1	0	0	0	0	0	0	0	0	0
1	0	0	0	0	0	20.11	0	69	110	80	1.31	0.94	5.06	0	0	0	0	0	0	1	1	0	0	0	0	0	0	0	0	0
1	0	0	0	0	0	23.1	0	69	99	54	1.4	0.49	4.41	0	0	0	0	0	0	1	1	0	0	0	0	0	0	0	0	0
1	0	0	0	0	0	20.1	0	68	119	69	1.38	0.46	4.98	0	0	0	0	0	0	1	1	0	0	0	0	0	0	0	0	0
1	0	0	0	0	0	24	0	71	120	70	1.31	0.94	5.06	0	0	0	0	0	0	1	1	0	0	0	0	0	0	0	0	0
1	0	0	0	0	0	37.11	0	78	120	80	1.48	0.7	5.42	0	0	0	0	0	0	1	1	0	0	0	0	0	0	0	0	0
1	0	0	0	0	0	46.11	0	85	120	70	1.4	0.88	3.97	0	0	0	0	0	0	1	1	0	0	0	0	0	0	0	0	0
1	0	0	0	0	0	25.09	0	67	110	70	1.14	0.93	4.08	0	0	0	0	0	0	1	1	0	0	0	0	0	0	0	0	0
1	0	0	0	0	0	24.02	0	74	96	68	1.24	0.59	5.39	0	0	0	0	0	0	1	1	0	0	0	0	0	0	0	0	0
1	0	0	0	0	0	20.03	0	68	110	70	1.04	0.33	2.89	0	0	0	0	0	0	1	1	0	0	0	0	0	0	0	0	0
1	0	0	0	0	0	24.52	0	77	110	70	1.19	1.13	5.11	0	0	0	0	0	0	1	1	0	0	0	0	0	0	0	0	0
1	0	0	0	0	0	23.02	0	78	110	70	1.11	1.06	4.54	0	0	0	0	0	0	1	1	0	0	0	0	0	0	0	0	0
1	0	0	0	0	0	32	0	76	120	80	1.29	0.71	3.43	0	0	0	0	0	0	1	1	0	0	0	0	0	0	0	0	0
1	0	0	0	0	0	23.07	0	76	112	71	2.05	0.61	3.95	0	0	0	0	0	0	1	1	0	0	0	0	0	0	0	0	0
1	0	0	0	0	0	32.08	0	62	120	60	1.72	0.34	4.54	0	0	0	0	0	0	1	1	0	0	0	0	0	0	0	0	0
1	0	0	0	0	0	26.08	0	75	120	78	1.67	0.38	4.28	0	0	0	0	0	0	1	1	0	0	0	0	0	0	0	0	0
1	0	0	0	0	0	33	0	71	110	70	1.27	0.96	5.06	0	0	0	0	0	0	1	1	0	0	0	0	0	0	0	0	0
1	0	0	0	0	0	38.05	0	73	110	70	1.28	0.66	5.12	0	0	0	0	0	0	1	1	0	0	0	0	0	0	0	0	0
1	0	0	0	0	0	37.1	0	75	106	50	1.09	0.67	5.17	0	0	0	0	0	0	1	1	0	0	0	0	0	0	0	0	0
1	0	0	0	0	0	38.1	0	66	120	60	2.13	0.7	4.75	0	0	0	0	0	0	1	1	0	0	0	0	0	0	0	0	0
1	0	0	0	0	0	36.07	0	79	110	70	1.67	0.82	4.69	0	0	0	0	0	0	1	1	0	0	0	0	0	0	0	0	0
1	0	0	0	0	0	40	0	75	120	84	1.5	0.9	5.46	0	0	0	0	0	0	1	1	0	0	0	0	0	0	0	0	0
1	0	0	0	0	0	47.82	0	75	120	80	1.04	0.99	4.19	0	0	0	0	0	0	1	1	0	0	0	0	0	0	0	0	0
1	0	0	0	0	0	46.1	0	73	120	74	2.09	1.24	4.71	0	0	0	0	0	0	1	1	0	0	0	0	0	0	0	0	0
1	0	0	0	0	0	70.11	0	86	129	60	1.21	0.76	5.04	0	0	0	0	0	0	1	1	0	0	0	0	0	0	0	0	0
1	0	0	0	0	0	38	0	84	100	70	1.41	0.85	5.41	0	0	0	0	0	0	1	1	0	0	0	0	0	0	0	0	0
1	0	0	0	0	0	26	0	68	120	80	1.71	0.59	6.06	0	0	0	1	0	0	7	7	0	0	0	0	0	0	0	0	0
1	0	0	0	0	0	31	0	74	120	70	1.07	0.7	5.83	0	0	0	1	0	0	7	7	0	0	0	0	0	0	0	0	0
1	0	0	0	0	0	34	0	88	108	70	1.44	0.71	6.07	0	0	0	1	0	0	7	7	0	0	0	0	0	0	0	0	0
1	0	0	0	0	0	51.06	0	84	120	80	1.21	1.17	5.3	0	1	1	0	0	0	7	7	0	0	0	0	0	0	0	0	0
1	0	0	0	0	0	43.1	0	70	120	70	0.92	2.3	4.53	0	1	1	0	0	0	7	7	0	0	0	0	0	0	0	0	0
1	0	0	0	0	0	48.09	0	78	122	80	0.75	2.55	4.99	0	1	1	0	0	0	7	7	0	0	0	0	0	0	0	0	0
1	0	0	0	0	0	53	0	76	120	70	0.75	4.3	4.75	0	1	1	0	0	0	7	7	0	0	0	0	0	0	0	0	0
1	0	0	0	0	0	23.03	0	78	106	70	1.23	1.82	5.07	0	1	0	0	0	0	7	7	0	0	0	0	0	0	0	0	0
1	0	0	0	0	0	47.07	0	75	126	74	1.13	1.72	5.18	0	1	0	0	0	0	7	7	0	0	0	0	0	0	0	0	0
1	0	0	0	0	0	25	0	84	110	70	1.49	7.6	4.33	0	1	0	0	0	0	7	7	0	0	0	0	0	0	0	0	0
1	0	0	0	0	0	43	0	82	118	80	1.12	5.5	5.32	0	1	0	0	0	0	7	7	0	0	0	0	0	0	0	0	0
2	0	0	0	0	0	26	0	74	122	70	1.04	0.95	4.76	0	0	1	0	0	0	7	7	0	0	0	0	0	0	0	0	0
2	0	0	0	0	0	19	0	65	120	70	1.25	0.92	4.75	0	0	1	0	0	0	7	7	0	0	0	0	0	0	0	0	0
2	0	0	0	0	0	23	0	66	94	60	1.11	0.47	4.97	0	0	1	0	0	0	7	7	0	0	0	0	0	0	0	0	0
2	0	0	0	0	0	20	0	69	89	48	1.25	1.06	4.94	0	0	1	0	0	0	7	7	0	0	0	0	0	0	0	0	0
2	0	0	0	0	0	25	0	79	100	60	1.14	0.94	5.18	0	0	1	0	0	0	7	7	0	0	0	0	0	0	0	0	0
2	0	0	0	0	0	38	0	77	106	72	1.26	0.6	4.09	0	0	1	0	0	0	7	7	0	0	0	0	0	0	0	0	0
2	0	0	0	0	0	28	0	63	119	80	1.05	0.71	4.64	0	0	1	0	0	0	7	7	0	0	0	0	0	0	0	0	0
2	0	0	0	0	0	22	0	71	111	80	1.1	1.43	5.46	0	0	1	0	0	0	7	7	0	0	0	0	0	0	0	0	0
2	0	0	0	0	0	33	0	74	110	80	1.1	0.67	4.65	0	0	1	0	0	0	7	7	0	0	0	0	0	0	0	0	0
2	0	0	0	0	0	33	0	78	120	70	0.95	0.42	3.89	0	0	1	0	0	0	7	7	0	0	0	0	0	0	0	0	0
2	0	0	0	0	0	29	0	70	110	74	1	0.41	3.38	0	0	1	0	0	0	7	7	0	0	0	0	0	0	0	0	0
2	0	0	0	0	0	20	0	73	118	78	1.02	0.31	3.49	0	0	1	0	0	0	7	7	0	0	0	0	0	0	0	0	0
2	0	0	0	0	0	22	0	73	120	70	1	0.38	4.58	0	0	1	0	0	0	7	7	0	0	0	0	0	0	0	0	0
2	0	0	0	0	0	30	0	69	100	60	0.88	1.4	4.6	0	0	1	0	0	0	7	7	0	0	0	0	0	0	0	0	0
2	0	0	0	0	0	21	0	79	108	70	0.74	1.67	5.14	0	0	1	0	0	0	7	7	0	0	0	0	0	0	0	0	0
2	0	0	0	0	0	30	0	77	110	70	0.52	1.45	5.08	0	0	1	0	0	0	7	7	0	0	0	0	0	0	0	0	0
2	0	0	0	0	0	24	0	75	100	50	0.91	0.95	3.69	0	0	1	0	0	0	7	7	0	0	0	0	0	0	0	0	0
2	0	0	0	0	0	28	0	67	100	60	0.99	0.53	5.48	0	0	1	0	0	0	7	7	0	0	0	0	0	0	0	0	0
2	0	0	0	0	0	32	0	78	110	70	0.75	0.82	4.11	0	0	1	0	0	0	7	7	0	0	0	0	0	0	0	0	0
2	0	0	0	0	0	24	0	70	120	70	0.94	1.33	4.34	0	0	1	0	0	0	7	7	0	0	0	0	0	0	0	0	0
2	0	0	0	0	0	37	0	70	110	71	1.03	0.88	4.46	0	0	1	0	0	0	7	7	0	0	0	0	0	0	0	0	0
2	0	0	0	0	0	35	0	79	100	60	0.86	0.76	4.53	0	0	1	0	0	0	7	7	0	0	0	0	0	0	0	0	0
2	0	0	0	0	0	55	0	72	110	70	0.89	1.33	4.47	0	0	1	0	0	0	7	7	0	0	0	0	0	0	0	0	0
2	0	0	0	0	0	32.11	0	73	120	71	1.13	0.64	4.83	0	0	1	0	0	0	7	7	0	0	0	0	0	0	0	0	0
2	0	0	0	0	0	31.08	0	72	100	50	1.27	0.9	5.59	0	0	1	0	0	0	7	7	0	0	0	0	0	0	0	0	0
2	0	0	0	0	0	25.01	0	74	122	75	1.18	0.55	4.49	0	0	1	0	0	0	7	7	0	0	0	0	0	0	0	0	0
2	0	0	0	0	0	25.07	0	72	110	70	1.15	0.73	4.74	0	0	1	0	0	0	7	7	0	0	0	0	0	0	0	0	0
2	0	0	0	0	0	33.11	0	71	126	72	1.17	1.45	4.86	0	0	1	0	0	0	7	7	0	0	0	0	0	0	0	0	0
2	0	0	0	0	0	18	0	75	119	80	0.77	1.29	3.59	0	0	1	0	0	0	7	7	0	0	0	0	0	0	0	0	0
2	0	0	0	0	0	39.1	0	71	104	70	1.04	0.51	4.99	0	0	1	0	0	0	7	7	0	0	0	0	0	0	0	0	0
2	0	0	0	0	0	46.08	0	77	99	71	1.17	1.13	5.3	0	0	1	0	0	0	7	7	0	0	0	0	0	0	0	0	0
2	0	0	0	0	0	28.01	0	78	122	80	1.21	0.63	5.12	0	0	1	0	0	0	7	7	0	0	0	0	0	0	0	0	0
2	0	0	0	0	0	26.06	0	70	119	70	0.65	0.53	3.41	0	0	1	0	0	0	7	7	0	0	0	0	0	0	0	0	0
2	0	0	0	0	0	31.08	0	73	109	78	0.67	0.8	4.22	0	0	1	0	0	0	7	7	0	0	0	0	0	0	0	0	0
2	0	0	0	0	0	29.06	0	77	86	44	1.02	1.57	5	0	0	1	0	0	0	7	7	0	0	0	0	0	0	0	0	0
2	0	0	0	0	0	30.11	0	76	110	60	0.9	1.08	4.33	0	0	1	0	0	0	7	7	0	0	0	0	0	0	0	0	0
2	0	0	0	0	0	40.04	0	66	109	62	0.7	0.37	4.04	0	0	1	0	0	0	7	7	0	0	0	0	0	0	0	0	0
2	0	0	0	0	0	26.1	0	67	111	80	1	0.41	3.38	0	0	1	0	0	0	7	7	0	0	0	0	0	0	0	0	0
2	0	0	0	0	0	33.09	0	68	120	84	0.88	0.51	3.65	0	0	1	0	0	0	7	7	0	0	0	0	0	0	0	0	0
2	0	0	0	0	0	36	0	78	110	80	0.93	0.65	4.57	0	0	1	0	0	0	7	7	0	0	0	0	0	0	0	0	0
2	0	0	0	0	0	21	0	65	120	70	1.57	0.61	4.67	0	0	0	0	0	0	1	1	0	0	0	0	0	0	0	0	0
2	0	0	0	0	0	30	0	65	110	60	1.83	0.59	5.01	0	0	0	0	0	0	1	1	0	0	0	0	0	0	0	0	0
2	0	0	0	0	0	33	0	72	110	70	1.62	0.9	5.52	0	0	0	0	0	0	1	1	0	0	0	0	0	0	0	0	0
2	0	0	0	0	0	26	0	70	110	72	1.94	0.73	3.67	0	0	0	0	0	0	1	1	0	0	0	0	0	0	0	0	0
2	0	0	0	0	0	31	0	77	120	80	2.12	0.54	4.96	0	0	0	0	0	0	1	1	0	0	0	0	0	0	0	0	0
2	0	0	0	0	0	26	0	75	102	68	1.4	0.66	2.6	0	0	0	0	0	0	1	1	0	0	0	0	0	0	0	0	0
2	0	0	0	0	0	24	0	68	110	70	1.5	0.61	5.41	0	0	0	0	0	0	1	1	0	0	0	0	0	0	0	0	0
2	0	0	0	0	0	30	0	60	108	60	1.4	0.9	3.65	0	0	0	0	0	0	1	1	0	0	0	0	0	0	0	0	0
2	0	0	0	0	0	36	0	73	100	70	1.42	0.68	5.35	0	0	0	0	0	0	1	1	0	0	0	0	0	0	0	0	0
2	0	0	0	0	0	44	0	75	100	65	1.47	1.27	5.11	0	0	0	0	0	0	1	1	0	0	0	0	0	0	0	0	0
2	0	0	0	0	0	23	0	69	120	80	1.37	0.66	4.56	0	0	0	0	0	0	1	1	0	0	0	0	0	0	0	0	0
2	0	0	0	0	0	27.09	0	72	120	70	1.73	0.55	4.87	0	0	0	0	0	0	1	1	0	0	0	0	0	0	0	0	0
2	0	0	0	0	0	24.01	0	77	114	58	2.46	0.89	3.95	0	0	0	0	0	0	1	1	0	0	0	0	0	0	0	0	0
2	0	0	0	0	0	30.08	0	75	110	60	1.61	1.54	4.46	0	0	0	0	0	0	1	1	0	0	0	0	0	0	0	0	0
2	0	0	0	0	0	31	0	68	110	80	1.3	0.98	3.82	0	0	0	0	0	0	1	1	0	0	0	0	0	0	0	0	0
2	0	0	0	0	0	26	0	77	120	80	1.4	0.81	5.14	0	0	0	0	0	0	1	1	0	0	0	0	0	0	0	0	0
2	0	0	0	0	0	37.03	0	77	114	74	1.73	0.67	4.91	0	0	0	0	0	0	1	1	0	0	0	0	0	0	0	0	0
2	0	0	0	0	0	40.07	0	75	102	78	1.58	0.59	4.1	0	0	0	0	0	0	1	1	0	0	0	0	0	0	0	0	0
2	0	0	0	0	0	47.1	0	72	120	70	2.08	0.78	5.44	0	0	0	0	0	0	1	1	0	0	0	0	0	0	0	0	0
2	0	0	0	0	0	27.06	0	76	116	80	1.64	0.34	4.09	0	0	0	0	0	0	1	1	0	0	0	0	0	0	0	0	0
2	0	0	0	0	0	30	0	74	110	80	1.58	1.15	3.15	0	0	0	0	0	0	1	1	0	0	0	0	0	0	0	0	0
2	0	0	0	0	0	24.11	0	70	119	64	1.4	1.21	4.73	0	0	0	0	0	0	1	1	0	0	0	0	0	0	0	0	0
2	0	0	0	0	0	26.92	0	69	100	70	1.3	0.48	4.16	0	0	0	0	0	0	1	1	0	0	0	0	0	0	0	0	0
2	0	0	0	0	0	30.1	0	67	119	72	1.32	0.39	4.37	0	0	0	0	0	0	1	1	0	0	0	0	0	0	0	0	0
2	0	0	0	0	0	23.07	0	74	120	70	1.53	0.93	4.27	0	0	0	0	0	0	1	1	0	0	0	0	0	0	0	0	0
2	0	0	0	0	0	27.05	0	71	110	70	1.51	0.67	4.71	0	0	0	0	0	0	1	1	0	0	0	0	0	0	0	0	0
2	0	0	0	0	0	32.1	0	76	110	74	1.46	0.65	5.09	0	0	0	0	0	0	1	1	0	0	0	0	0	0	0	0	0
2	0	0	0	0	0	26.01	0	68	110	72	1.35	1.05	4.56	0	0	0	0	0	0	1	1	0	0	0	0	0	0	0	0	0
2	0	0	0	0	0	35.09	0	70	100	70	1.52	0.55	3.05	0	0	0	0	0	0	1	1	0	0	0	0	0	0	0	0	0
2	0	0	0	0	0	35.09	0	77	109	72	1.45	0.57	4.84	0	0	0	0	0	0	1	1	0	0	0	0	0	0	0	0	0
2	0	0	0	0	0	35.08	0	76	101	62	1.41	0.85	5.41	0	0	0	0	0	0	1	1	0	0	0	0	0	0	0	0	0
2	0	0	0	0	0	30.01	0	77	120	80	1.43	1.18	4.81	0	0	0	0	0	0	1	1	0	0	0	0	0	0	0	0	0
2	0	0	0	0	0	36.07	0	74	120	80	1.43	0.42	4.8	0	0	0	0	0	0	1	1	0	0	0	0	0	0	0	0	0
2	0	0	0	0	0	64.07	0	64	120	80	1.53	1.27	5.36	0	0	0	0	0	0	1	1	0	0	0	0	0	0	0	0	0
1	0	0	0	0	1	24.09	0	71	102	80	1.09	1.02	4.88	0	0	0	0	0	0	1	1	0	0	0	0	0	0	0	0	0
2	0	0	0	0	0	44	0	74	110	70	1.14	1.25	7.39	0	0	1	1	0	0	7	7	0	0	0	0	0	0	0	0	0
2	0	0	0	0	0	41.04	0	77	120	70	0.82	1.25	7.13	0	0	1	1	0	0	7	7	0	0	0	0	0	0	0	0	0
2	0	0	0	0	0	31	0	76	116	67	1.19	0.74	6.35	0	0	1	1	0	0	7	7	0	0	0	0	0	0	0	0	0
2	0	0	0	0	0	67	0	71	110	70	1.26	1.36	6.71	0	0	1	1	0	0	7	7	0	0	0	0	0	0	0	0	0
2	0	0	0	0	0	27	0	77	120	80	1.12	0.53	5.95	0	0	1	1	0	0	7	7	0	0	0	0	0	0	0	0	0
2	0	0	0	0	0	29	0	65	118	78	1.03	0.67	5.98	0	0	1	1	0	0	7	7	0	0	0	0	0	0	0	0	0
2	0	0	0	0	0	29	0	78	100	70	0.89	0.99	5.88	0	0	1	1	0	0	7	7	0	0	0	0	0	0	0	0	0
2	0	0	0	0	0	41	0	76	120	80	1.08	0.91	6.02	0	0	1	1	0	0	7	7	0	0	0	0	0	0	0	0	0
2	0	0	0	0	0	31.08	0	68	110	70	1.29	0.65	5.75	0	0	1	1	0	0	7	7	0	0	0	0	0	0	0	0	0
2	0	0	0	0	0	43.11	0	75	104	58	1.27	0.87	6.79	0	0	1	1	0	0	7	7	0	0	0	0	0	0	0	0	0
2	0	0	0	0	0	68	0	76	120	80	0.88	1.01	6.48	0	0	1	1	0	0	7	7	0	0	0	0	0	0	0	0	0
2	0	0	0	0	0	32.05	0	73	110	70	0.92	0.83	5.74	0	0	1	1	0	0	7	7	0	0	0	0	0	0	0	0	0
2	0	0	0	0	0	24.02	0	78	120	70	0.85	0.37	6.23	0	0	1	1	0	0	7	7	0	0	0	0	0	0	0	0	0
2	0	0	0	0	0	37.08	0	69	106	68	0.82	0.4	6.03	0	0	1	1	0	0	7	7	0	0	0	0	0	0	0	0	0
2	0	0	0	0	0	23	0	75	120	80	1.32	0.38	7.39	0	0	0	1	0	0	7	7	0	0	0	0	0	0	0	0	0
2	0	0	0	0	0	23.11	0	79	110	80	1.48	0.87	7.01	0	0	0	1	0	0	7	7	0	0	0	0	0	0	0	0	0
2	0	0	0	0	0	43	0	76	110	70	1.9	0.5	6	0	0	0	1	0	0	7	7	0	0	0	0	0	0	0	0	0
2	0	0	0	0	0	26	0	76	122	84	1.53	0.71	5.66	0	0	0	1	0	0	7	7	0	0	0	0	0	0	0	0	0
2	0	0	0	0	0	38.08	0	79	120	70	1.71	0.61	6.04	0	0	0	1	0	0	7	7	0	0	0	0	0	0	0	0	0
2	0	0	0	0	0	29.72	0	70	110	70	1.38	0.69	6.2	0	0	0	1	0	0	7	7	0	0	0	0	0	0	0	0	0
2	0	0	0	0	0	37.03	0	69	114	67	1.44	0.54	6.74	0	0	0	1	0	0	7	7	0	0	0	0	0	0	0	0	0
2	0	0	0	0	0	42.02	0	76	120	80	2.13	0.41	5.79	0	0	0	1	0	0	7	7	0	0	0	0	0	0	0	0	0
2	0	0	0	0	0	22.02	0	68	118	80	1.48	0.57	5.75	0	0	0	1	0	0	7	7	0	0	0	0	0	0	0	0	0
2	0	0	0	0	0	49.09	0	71	120	80	1.46	1.22	6.41	0	0	0	1	0	0	7	7	0	0	0	0	0	0	0	0	0
2	0	0	0	0	0	33.09	0	73	120	70	1.46	0.42	5	0	1	1	0	0	0	7	7	0	0	0	0	0	0	0	0	0
2	0	0	0	0	0	22	0	64	120	80	1.18	1.89	4.61	0	1	1	0	0	0	7	7	0	0	0	0	0	0	0	0	0
2	0	0	0	0	0	36	0	64	96	66	1.22	3.3	4.22	0	1	1	0	0	0	7	7	0	0	0	0	0	0	0	0	0
2	0	0	0	0	0	42	0	70	110	80	1.22	1.97	4.55	0	1	1	0	0	0	7	7	0	0	0	0	0	0	0	0	0
2	0	0	0	0	0	33	0	73	119	79	1	4.5	5.27	0	1	1	0	0	0	7	7	0	0	0	0	0	0	0	0	0
2	0	0	0	0	0	31	0	75	96	60	0.68	2.93	5.53	0	1	1	0	0	0	7	7	0	0	0	0	0	0	0	0	0
2	0	0	0	0	0	38.02	0	74	105	70	0.88	2	5.54	0	1	1	0	0	0	7	7	0	0	0	0	0	0	0	0	0
2	0	0	0	0	0	44.09	0	73	120	80	1.09	2.6	4.44	0	1	1	0	0	0	7	7	0	0	0	0	0	0	0	0	0
2	0	0	0	0	0	29	0	74	100	66	0.61	6.9	4.47	0	1	1	0	0	0	7	7	0	0	0	0	0	0	0	0	0
2	0	0	0	0	0	27.11	0	70	90	60	0.89	11.6	4.93	0	1	1	0	0	0	7	7	0	0	0	0	0	0	0	0	0
2	0	0	0	0	0	25	0	72	112	73	0.88	6.4	2.91	0	1	1	0	0	0	7	7	0	0	0	0	0	0	0	0	0
2	0	0	0	0	0	38	0	74	110	80	0.86	5.4	4.1	0	1	1	0	0	0	7	7	0	0	0	0	0	0	0	0	0
2	0	0	0	0	0	36	0	73	110	80	0.72	2.9	4.95	0	1	1	0	0	0	7	7	0	0	0	0	0	0	0	0	0
2	0	0	0	0	0	40.08	0	74	110	80	1.17	11.1	4.98	0	1	1	0	0	0	7	7	0	0	0	0	0	0	0	0	0
2	0	0	0	0	0	38	0	72	100	70	1.49	10.2	4.78	0	1	0	0	0	0	7	7	0	0	0	0	0	0	0	0	0
1	0	0	0	0	0	35	0	90	120	80	1	1.06	5.16	0	0	1	0	0	1	7	3	0	0	0	0	1	0	0	0	1
2	0	0	0	0	1	41.05	0	70	110	70	1.15	0.76	4.75	0	0	1	0	0	0	7	7	0	0	0	0	0	0	0	0	0
1	0	0	0	0	0	66	0	90	120	80	2.05	1.17	5.3	0	0	0	0	0	1	7	2	0	0	0	0	1	0	0	0	1
1	0	0	0	0	0	32.01	0	90	124	78	1.38	0.99	4.59	0	0	0	0	0	1	7	2	0	0	0	0	1	0	0	0	1
1	0	0	0	0	0	46	0	108	114	84	1.09	0.61	4.79	0	0	0	0	0	1	7	2	0	0	0	0	1	0	0	0	1
1	0	0	0	0	0	33	0	93	110	80	1.09	1.53	4.23	0	0	0	0	0	1	7	2	0	0	0	0	1	0	0	0	1
2	0	0	0	0	1	42	0	72	99	60	1.39	0.88	5.54	0	0	0	0	0	0	1	1	0	0	0	0	0	0	0	0	0
2	0	0	0	0	1	43.09	0	65	100	70	1.45	1.06	4.43	0	0	0	0	0	0	1	1	0	0	0	0	0	0	0	0	0
2	0	0	0	0	1	26.01	0	72	128	80	1.48	0.44	4.4	0	0	0	0	0	0	1	1	0	0	0	0	0	0	0	0	0
1	0	0	0	0	0	55.1	0	93	110	70	1.39	0.98	6.8	0	0	0	1	0	1	7	3	0	0	0	0	1	0	0	0	1
2	0	0	0	0	1	25	0	66	110	60	1.45	0.78	6.42	0	0	0	1	0	0	7	7	0	0	0	0	0	0	0	0	0
1	0	0	0	0	0	24.62	0	91	120	80	0.84	4.87	5.59	1	1	1	0	0	1	7	4	0	0	0	0	1	0	0	0	1
1	0	0	0	0	0	44	0	94	102	75	1.43	1.95	3.82	0	1	0	0	0	1	7	3	0	0	0	0	1	0	0	0	1
1	0	0	0	0	0	48	0	98	120	80	1.44	7.1	4.66	0	1	0	0	0	1	7	3	0	0	0	0	1	0	0	0	1
2	0	0	0	0	0	26	0	82	110	70	0.96	1.65	5.33	0	0	1	0	0	1	7	3	0	0	0	0	1	0	0	0	1
2	0	0	0	0	0	42	0	83	110	50	1.04	0.51	4.99	0	0	1	0	0	1	7	3	0	0	0	0	1	0	0	0	1
2	0	0	0	0	0	50	0	80	110	70	0.95	0.81	3.76	0	0	1	0	0	1	7	3	0	0	0	0	1	0	0	0	1
2	0	0	0	0	0	48	0	82	100	80	1.04	0.81	5.52	0	0	1	0	0	1	7	3	0	0	0	0	1	0	0	0	1
2	0	0	0	0	0	34	0	81	120	70	0.9	0.58	4.6	0	0	1	0	0	1	7	3	0	0	0	0	1	0	0	0	1
2	0	0	0	0	0	30	0	80	120	70	0.54	1.22	4.35	0	0	1	0	0	1	7	3	0	0	0	0	1	0	0	0	1
2	0	0	0	0	0	52	0	83	122	80	1.29	0.43	4.75	0	0	1	0	0	1	7	3	0	0	0	0	1	0	0	0	1
2	0	0	0	0	0	23.06	0	80	99	62	1.28	1.46	4.56	0	0	1	0	0	1	7	3	0	0	0	0	1	0	0	0	1
2	0	0	0	0	0	22	0	80	120	80	0.4	0.59	3.42	0	0	1	0	0	1	7	3	0	0	0	0	1	0	0	0	1
2	0	0	0	0	0	32.09	0	83	112	78	1.29	1.3	3.99	0	0	1	0	0	1	7	3	0	0	0	0	1	0	0	0	1
2	0	0	0	0	0	32.04	0	83	90	60	1.29	1.54	4.86	0	0	1	0	0	1	7	3	0	0	0	0	1	0	0	0	1
2	0	0	0	0	0	26.08	0	80	120	80	1.29	0.41	3.76	0	0	1	0	0	1	7	3	0	0	0	0	1	0	0	0	1
2	0	0	0	0	0	27.06	0	83	128	80	1.04	0.57	3.93	0	0	1	0	0	1	7	3	0	0	0	0	1	0	0	0	1
2	0	0	0	0	0	32.08	0	81	120	80	1.09	1.38	5.03	0	0	1	0	0	1	7	3	0	0	0	0	1	0	0	0	1
2	0	0	0	0	0	27.06	0	84	120	80	1.21	0.57	4.87	0	0	1	0	0	1	7	3	0	0	0	0	1	0	0	0	1
2	0	0	0	0	0	35.09	0	81	120	80	1.22	0.51	4.25	0	0	1	0	0	1	7	3	0	0	0	0	1	0	0	0	1
2	0	0	0	0	0	28	0	89	98	60	1.2	0.49	3.34	0	0	1	0	0	1	7	3	0	0	0	0	1	0	0	0	1
2	0	0	0	0	0	35.02	0	84	120	80	0.97	0.69	4.58	0	0	1	0	0	1	7	3	0	0	0	0	1	0	0	0	1
2	0	0	0	0	0	52	0	101	110	80	0.98	1.37	5.24	0	0	1	0	0	1	7	3	0	0	0	0	1	0	0	0	1
2	0	0	0	0	0	53.03	0	96	110	70	1.03	1.04	4.59	0	0	1	0	0	1	7	3	0	0	0	0	1	0	0	0	1
2	0	0	0	0	0	23	0	85	120	80	1.09	1.16	4.46	0	0	1	0	0	1	7	3	0	0	0	0	1	0	0	0	1
2	0	0	0	0	0	33.03	0	85	110	70	1.01	0.53	4.72	0	0	1	0	0	1	7	3	0	0	0	0	1	0	0	0	1
2	0	0	0	0	0	35.06	0	88	120	80	1.26	0.98	5.01	0	0	1	0	0	1	7	3	0	0	0	0	1	0	0	0	1
2	0	0	0	0	0	23	0	94	126	80	0.75	0.47	5.04	0	0	1	0	0	1	7	3	0	0	0	0	1	0	0	0	1
2	0	0	0	0	0	38	0	105	100	70	1.22	0.91	5.03	0	0	1	0	0	1	7	3	0	0	0	0	1	0	0	0	1
2	0	0	0	0	0	25	0	82	100	48	1.38	0.47	5.09	0	0	0	0	0	1	7	2	0	0	0	0	1	0	0	0	1
2	0	0	0	0	0	27.02	0	83	90	60	1.64	0.71	5.5	0	0	0	0	0	1	7	2	0	0	0	0	1	0	0	0	1
2	0	0	0	0	0	20.08	0	83	88	68	1.77	0.67	4.89	0	0	0	0	0	1	7	2	0	0	0	0	1	0	0	0	1
2	0	0	0	0	0	41.1	0	84	110	80	1.81	0.4	3.99	0	0	0	0	0	1	7	2	0	0	0	0	1	0	0	0	1
2	0	0	0	0	0	47.03	0	84	120	80	1.9	0.68	4.83	0	0	0	0	0	1	7	2	0	0	0	0	1	0	0	0	1
2	0	0	0	0	0	50.09	0	88	116	76	1.61	1.14	4.52	0	0	0	0	0	1	7	2	0	0	0	0	1	0	0	0	1
2	0	0	0	0	0	26.04	0	81	110	70	1.39	0.94	4.44	0	0	0	0	0	1	7	2	0	0	0	0	1	0	0	0	1
2	0	0	0	0	0	33.42	0	83	110	80	1.91	1.1	4.31	0	0	0	0	0	1	7	2	0	0	0	0	1	0	0	0	1
2	0	0	0	0	0	28.11	0	80	110	70	1.32	0.98	5.59	0	0	0	0	0	1	7	2	0	0	0	0	1	0	0	0	1
2	0	0	0	0	0	25.02	0	83	90	60	1.47	1.04	4.35	0	0	0	0	0	1	7	2	0	0	0	0	1	0	0	0	1
2	0	0	0	0	0	31.04	0	80	100	80	1.48	0.56	5.27	0	0	0	0	0	1	7	2	0	0	0	0	1	0	0	0	1
2	0	0	0	0	0	41	0	82	120	80	1.38	0.92	4.98	0	0	0	0	0	1	7	2	0	0	0	0	1	0	0	0	1
2	0	0	0	0	0	29	0	85	110	72	1.32	0.49	4.59	0	0	0	0	0	1	7	2	0	0	0	0	1	0	0	0	1
2	0	0	0	0	0	55.03	0	91	120	81	1.42	1.03	5.08	0	0	0	0	0	1	7	2	0	0	0	0	1	0	0	0	1
2	0	0	0	0	0	34.07	0	87	110	70	1.42	0.94	5.47	0	0	0	0	0	1	7	2	0	0	0	0	1	0	0	0	1
2	0	0	0	0	0	28.1	0	85	114	68	1.46	1.57	4.23	0	0	0	0	0	1	7	2	0	0	0	0	1	0	0	0	1
2	0	0	0	0	0	29.08	0	90	110	80	1.61	0.77	4.28	0	0	0	0	0	1	7	2	0	0	0	0	1	0	0	0	1
2	0	0	0	0	0	42.08	0	108	120	80	1.5	0.66	4.72	0	0	0	0	0	1	7	2	0	0	0	0	1	0	0	0	1
2	0	0	0	0	0	32	0	91	100	80	1.53	0.43	3.48	0	0	0	0	0	1	7	2	0	0	0	0	1	0	0	0	1
2	0	0	0	0	0	49	0	100	110	80	1.01	1.59	7	1	0	1	1	0	1	7	4	0	0	0	0	1	0	0	0	1
2	0	0	0	0	0	37.03	0	80	120	80	0.89	1.65	6.02	1	0	1	1	0	1	7	4	0	0	0	0	1	0	0	0	1
2	0	0	0	0	0	44	0	94	100	70	1.23	1.17	6.48	1	0	1	1	0	1	7	4	0	0	0	0	1	0	0	0	1
2	0	0	0	0	0	18	0	86	110	56	0.85	0.37	6.23	1	0	1	1	0	1	7	4	0	0	0	0	1	0	0	0	1
2	0	0	0	0	0	46.05	0	91	120	80	0.87	0.37	5.72	1	0	1	1	0	1	7	4	0	0	0	0	1	0	0	0	1
2	0	0	0	0	0	43.02	0	99	120	80	0.97	1.3	5.84	1	0	1	1	0	1	7	4	0	0	0	0	1	0	0	0	1
2	0	0	0	0	0	53.02	0	84	122	70	1.91	0.77	9.44	0	0	0	1	0	1	7	3	0	0	0	0	1	0	0	0	1
2	0	0	0	0	0	49.11	0	88	110	70	1.8	1.36	9.85	0	0	0	1	0	1	7	3	0	0	0	0	1	0	0	0	1
2	0	0	0	0	0	45.02	0	110	120	80	1.3	1.29	7.65	0	0	0	1	0	1	7	3	0	0	0	0	1	0	0	0	1
2	0	0	0	0	0	21.11	0	81	116	71	1.45	0.58	5.79	0	0	0	1	0	1	7	3	0	0	0	0	1	0	0	0	1
2	0	0	0	0	0	36	0	86	98	58	1.31	0.39	5.79	0	0	0	1	0	1	7	3	0	0	0	0	1	0	0	0	1
2	0	0	0	0	0	28	0	87	120	80	1.39	0.65	6.16	0	0	0	1	0	1	7	3	0	0	0	0	1	0	0	0	1
2	0	0	0	0	0	36	0	102	120	77	1.3	11.1	4.39	1	1	1	0	0	1	7	4	0	0	0	0	1	0	0	0	1
2	0	0	0	0	0	27.06	0	83	120	60	1.05	2.7	2.97	1	1	1	0	0	1	7	4	0	0	0	0	1	0	0	0	1
2	0	0	0	0	0	29	0	80	106	70	1.2	2.67	4.41	1	1	1	0	0	1	7	4	0	0	0	0	1	0	0	0	1
2	0	0	0	0	0	41	0	83	110	70	0.56	5.8	4.33	1	1	1	0	0	1	7	4	0	0	0	0	1	0	0	0	1
2	0	0	0	0	0	38	0	85	120	70	0.63	2.63	5.55	1	1	1	0	0	1	7	4	0	0	0	0	1	0	0	0	1
2	0	0	0	0	0	29.04	0	90	118	80	1.21	2.5	5.1	1	1	1	0	0	1	7	4	0	0	0	0	1	0	0	0	1
2	0	0	0	0	0	26.03	0	102	102	61	0.97	2.2	4.07	1	1	1	0	0	1	7	4	0	0	0	0	1	0	0	0	1
2	0	0	0	0	0	58.05	0	98	120	70	0.7	2.1	4.26	1	1	1	0	0	1	7	4	0	0	0	0	1	0	0	0	1
2	0	0	0	0	0	26	0	80	120	80	1.65	3.8	4.28	0	1	0	0	0	1	7	3	0	0	0	0	1	0	0	0	1
2	0	0	0	0	0	26	0	87	110	70	1.44	4.6	4.88	0	1	0	0	0	1	7	3	0	0	0	0	1	0	0	0	1
2	0	0	0	0	0	41.07	0	93	100	80	1.39	2.24	5.14	0	1	0	0	0	1	7	3	0	0	0	0	1	0	0	0	1
2	0	0	0	0	1	34.03	0	87	110	70	1.38	3	4.59	0	1	0	0	0	1	7	3	0	0	0	0	1	0	0	0	1
1	0	1	0	0	0	31.03	0	89	119	67	0.97	0.9	5.4	0	0	1	0	0	0	7	7	0	0	0	0	0	0	0	0	0
1	0	1	0	0	0	34.09	0	86	118	72	0.93	1.18	5.52	0	0	1	0	0	0	7	7	0	0	0	0	0	0	0	0	0
1	0	1	0	0	0	29.01	0	74	104	54	0.95	1.4	4.92	0	0	1	0	0	0	7	7	0	0	0	0	0	0	0	0	0
1	0	1	0	0	0	29.03	0	81.4	103	59	1.61	0.46	4.8	0	0	0	0	0	0	1	1	0	0	0	0	0	0	0	0	0
1	0	1	0	0	0	37.01	0	79.2	119	79	1.83	0.83	4.9	0	0	0	0	0	0	1	1	0	0	0	0	0	0	0	0	0
1	0	1	0	0	0	43.03	0	78	129	78	1.68	1.18	4.01	0	0	0	0	0	0	1	1	0	0	0	0	0	0	0	0	0
1	0	1	0	0	0	29.06	0	72	120	70	1.52	1.39	5.1	0	0	0	0	0	0	1	1	0	0	0	0	0	0	0	0	0
1	0	1	0	0	0	40.08	0	85	110	70	1.66	1.06	6.64	0	0	0	1	0	0	7	7	0	0	0	0	0	0	0	0	0
2	0	1	0	0	0	25.06	0	71	124	84	0.85	0.89	5.63	0	0	1	1	0	0	7	7	0	0	0	0	0	0	0	0	0
1	0	1	0	0	0	41.09	0	97	110	72.5	1.68	1.28	5	0	0	0	0	0	1	7	2	0	0	0	0	1	0	0	0	1
1	0	1	0	0	0	49.03	0	115	120	77.5	1.09	1.57	5	0	0	0	0	0	1	7	2	0	0	0	0	1	0	0	0	1
1	0	1	0	0	0	38.08	0	109	124	84	1.29	1.6	5.35	0	0	0	0	0	1	7	2	0	0	0	0	1	0	0	0	1
1	0	1	0	0	0	43.11	0	111	125	80	1.32	1.77	5.2	0	1	0	0	0	1	7	3	0	0	0	0	1	0	0	0	1
1	0	1	0	0	0	28.04	0	77	110	74	1.38	0.78	4.74	0	0	0	0	0	0	1	1	0	0	0	0	0	0	0	0	0
1	0	1	0	0	0	54.11	0	77	116	80	1.32	0.74	4.2	0	0	0	0	0	0	1	1	0	0	0	0	0	0	0	0	0
1	0	1	0	0	0	29	0	79	94	66	1.08	0.52	6.15	0	0	0	1	0	0	7	7	0	0	0	0	0	0	0	0	0
2	0	1	0	0	0	37	0	66	100	70	1.39	0.48	4.05	0	0	0	0	0	0	1	1	0	0	0	0	0	0	0	0	0
1	0	1	0	0	0	50.09	0	104	118	81	1.28	0.66	4.56	0	0	0	0	0	1	7	2	0	0	0	0	1	0	0	0	1
1	0	1	0	0	0	49.04	0	108	120	80	0.99	1.37	5.86	1	0	1	1	0	1	7	4	0	0	0	0	1	0	0	0	1
2	0	1	0	0	0	28	0	82	84	58	1.17	2.2	4.69	1	1	1	0	0	1	7	4	0	0	0	0	1	0	0	0	1
1	1	0	1	0	0	42	0	75	130	95	1.37	2	3.52	1	1	1	0	1	0	4	7	0	1	0	0	0	0	0	1	0
1	1	0	1	0	0	77.08	0	89	160	95	1.48	0.85	4.2	1	1	1	0	1	0	4	7	0	1	0	0	0	0	0	1	0
1	1	0	1	0	0	40.1	0	84	149	109	2.34	2.45	5.8	1	1	0	1	1	0	4	7	0	1	0	0	0	0	0	1	0
2	1	0	1	0	0	50.07	0	72.7	140	98	1.14	2.08	4.94	1	1	1	0	1	0	4	7	0	1	0	0	0	0	0	1	0
2	1	0	1	0	0	54.04	0	68	138	91	1.33	0.92	5.6	1	1	1	1	1	0	5	7	1	0	0	0	0	1	0	1	0
1	1	0	1	0	1	57.01	0	80	150	100	1.45	1.3	6.8	1	1	1	1	1	0	5	7	1	0	0	0	0	1	0	1	0
1	1	0	1	0	0	34.1	0	102	146	105	1.55	4.96	5.8	1	1	0	1	1	1	5	5	0	1	0	0	1	0	1	0	0
2	1	0	1	0	0	39.11	0	110	136	92	1.17	2.38	3.52	1	1	1	0	1	1	5	5	0	1	0	0	1	0	1	0	0
2	1	0	1	0	1	45.1	0	96.2	132	96	1.88	0.6	5.9	1	1	1	1	1	1	6	6	1	0	0	1	0	0	1	0	0
1	1	0	1	0	0	32.09	0	86	135	75	0.8	0.65	5.27	0	0	1	0	1	0	3	7	0	1	0	0	0	0	0	1	0
1	1	0	1	0	0	44.02	0	89.3	138	82	1.26	0.84	5.36	0	0	0	0	1	0	2	7	0	1	0	0	0	0	0	1	0
1	1	0	1	0	0	44.06	0	85	141	90	1.36	0.62	4.95	0	0	0	0	1	0	2	7	0	1	0	0	0	0	0	1	0
1	1	0	1	0	0	36.04	0	73	141	90	1.09	0.72	4.17	0	0	0	0	1	0	2	7	0	1	0	0	0	0	0	1	0
1	1	0	1	0	0	44.1	0	81	134	90	1.15	1.29	4.33	0	0	0	0	1	0	2	7	0	1	0	0	0	0	0	1	0
1	1	0	1	0	0	45.09	0	82.6	119	86	1.4	1.09	7.29	0	0	0	1	1	0	3	7	0	1	0	0	0	0	0	1	0
1	1	0	1	0	0	31.05	0	72	128	90	1.76	0.64	6.05	0	0	0	1	1	0	3	7	0	1	0	0	0	0	0	1	0
1	1	0	1	0	0	40.03	0	80	109	89	1.6	0.8	5.6	0	0	0	1	1	0	3	7	0	1	0	0	0	0	0	1	0
1	1	0	1	1	0	37.11	0	115	140	90	1.27	1.33	5.2	0	0	0	0	1	1	3	3	0	1	0	0	1	0	1	0	0
2	1	0	1	0	0	61.02	0	72	135	87	1.21	1.18	4.69	0	0	1	0	1	0	3	7	0	1	0	0	0	0	0	1	0
2	1	0	1	0	0	50.06	0	76	160	75	1.64	0.73	5.3	0	0	0	0	1	0	2	7	0	1	0	0	0	0	0	1	0
2	1	0	1	0	0	56.07	0	71	140	90	1.36	0.82	5.1	0	0	0	0	1	0	2	7	0	1	0	0	0	0	0	1	0
1	1	0	1	0	1	41.05	0	79	130	92	1.5	0.99	4.6	0	0	0	0	1	0	2	7	0	1	0	0	0	0	0	1	0
2	1	0	1	0	0	44.1	0	75	144	90	1.09	1.51	5.82	1	0	1	1	1	0	4	7	0	1	0	0	0	0	0	1	0
2	1	0	1	0	0	36.01	0	75.8	135	74	1.6	0.58	5.82	0	0	0	1	1	0	3	7	0	1	0	0	0	0	0	1	0
1	1	0	1	0	1	69.09	0	74	152	104	1.34	0.77	5.65	0	0	0	1	1	0	3	7	0	1	0	0	0	0	0	1	0
1	1	0	1	0	0	49.08	0	94.1	134	90	1.44	1.09	4.88	0	0	0	0	1	1	3	3	0	1	0	0	1	0	1	0	0
1	1	0	1	0	0	31.09	0	91	156	101	1.75	1.68	5.5	0	0	0	0	1	1	3	3	0	1	0	0	1	0	1	0	0
1	1	0	1	0	0	48.08	0	97	140	87.5	1.35	0.8	5.5	0	0	0	0	1	1	3	3	0	1	0	0	1	0	1	0	0
1	1	0	1	0	0	54	0	90.1	152	83	1.01	0.84	5.89	1	0	1	1	1	1	5	5	0	1	0	0	1	0	1	0	0
1	1	0	1	0	0	52.03	0	94.4	149	84	1.82	0.56	6.2	1	0	0	1	1	1	4	4	0	1	0	0	1	0	1	0	0
1	1	0	1	0	0	60	0	93	155	98	1.43	1.35	5.7	1	0	0	1	1	1	4	4	0	1	0	0	1	0	1	0	0
2	1	0	1	0	0	62.11	0	97	140	100	1.21	0.75	3.55	1	0	1	0	1	1	4	4	0	1	0	0	1	0	1	0	0
2	1	0	1	0	0	47.11	0	99	142	86	1.09	1.04	3.98	1	0	1	0	1	1	4	4	0	1	0	0	1	0	1	0	0
2	1	0	1	0	0	38.09	0	82.2	141	89	1.44	1.06	4.29	0	0	0	0	1	1	3	3	0	1	0	0	1	0	1	0	0
2	1	0	1	0	0	43.05	0	94.8	155	99	1.6	0.92	5.08	0	0	0	0	1	1	3	3	0	1	0	0	1	0	1	0	0
2	1	0	1	0	0	55.08	0	82	134	86	2.37	0.79	5.8	1	0	0	1	1	1	4	4	0	1	0	0	1	0	1	0	0
2	1	0	1	0	0	55.08	0	82	149	86	1.85	0.8	5.7	1	0	0	1	1	1	4	4	0	1	0	0	1	0	1	0	0
2	1	0	1	0	0	71.03	0	96	140	92	2	1	6.42	1	0	0	1	1	1	4	4	0	1	0	0	1	0	1	0	0
2	1	0	1	0	0	44.02	0	88.7	193	113	1.3	1.04	6.39	1	0	0	1	1	1	4	4	0	1	0	0	1	0	1	0	0
2	1	0	1	0	0	45.08	0	96	139	99	1.66	0.91	6.4	1	0	0	1	1	1	4	4	0	1	0	0	1	0	1	0	0
2	1	0	1	0	1	65.01	0	80	171	109	2.12	1.34	3.8	0	0	0	0	1	1	3	3	0	1	0	0	1	0	1	0	0
1	1	0	1	0	0	23	0	89	145	90	0.8	2.7	3.93	1	1	1	0	1	0	4	7	0	1	0	0	0	0	0	1	0
2	1	0	1	0	0	55	0	70	136	80	1.05	2.04	5.18	1	1	1	0	1	0	4	7	0	1	0	0	0	0	0	1	0
1	1	0	1	0	0	47.11	0	95	150	90	1.03	2.91	5.41	1	1	1	0	1	1	5	5	0	1	0	0	1	0	1	0	0
1	1	0	1	0	0	46.07	0	95	142	80	1.04	1.72	5.3	1	1	0	0	1	1	4	4	0	1	0	0	1	0	1	0	0
1	1	0	1	0	0	44.07	0	97	160	110	1.77	1.71	11.04	1	1	0	1	1	1	5	5	0	1	0	0	1	0	1	0	0
2	1	0	1	0	0	60	0	101	139	89	0.95	2.12	5.27	1	1	1	0	1	1	5	5	0	1	0	0	1	0	1	0	0
1	1	0	1	0	1	36.05	0	90	120	87	1.16	1.83	3.67	1	1	0	0	1	1	4	4	0	1	0	0	1	0	1	0	0
1	1	0	1	0	0	75.06	0	82	138	76	0.99	0.91	3.82	0	0	1	0	1	0	3	7	0	1	0	0	0	0	0	1	0
1	1	0	1	0	0	49.11	0	88	138	87	0.87	0.89	4.91	0	0	1	0	1	0	3	7	0	1	0	0	0	0	0	1	0
1	1	0	1	0	0	29.06	0	74	130	83	1.32	0.93	4.64	0	0	0	0	1	0	2	7	0	1	0	0	0	0	0	1	0
1	1	0	1	0	0	42.01	0	80	130	80	1.32	0.44	5.1	0	0	0	0	1	0	2	7	0	1	0	0	0	0	0	1	0
1	1	0	1	0	0	55.09	0	84	147	89	1.75	1.01	4.82	0	0	0	0	1	0	2	7	0	1	0	0	0	0	0	1	0
1	1	0	1	0	0	43.06	0	83	132	70	1.07	0.66	4.21	0	0	0	0	1	0	2	7	0	1	0	0	0	0	0	1	0
1	1	0	1	0	0	66.11	0	74	159	100	1.81	0.6	4.42	0	0	0	0	1	0	2	7	0	1	0	0	0	0	0	1	0
1	1	0	1	0	0	49.06	0	88	160	100	1.3	1.02	5.12	0	0	0	0	1	0	2	7	0	1	0	0	0	0	0	1	0
1	1	0	1	0	0	52	0	78	130	100	1.33	0.65	5.59	0	0	0	0	1	0	2	7	0	1	0	0	0	0	0	1	0
1	1	0	1	0	0	43.02	0	71	149	80	1.52	0.62	11.21	0	0	0	1	1	0	3	7	0	1	0	0	0	0	0	1	0
1	1	0	1	0	0	66.04	0	78	148	80	1.09	0.99	5.67	0	0	0	1	1	0	3	7	0	1	0	0	0	0	0	1	0
2	1	0	1	0	0	31	0	64	116	88	1.21	0.88	4.96	0	0	1	0	1	0	3	7	0	1	0	0	0	0	0	1	0
2	1	0	1	0	0	44.06	0	73	129	99	0.95	0.81	3.6	0	0	1	0	1	0	3	7	0	1	0	0	0	0	0	1	0
2	1	0	1	0	0	40.04	0	75	130	90	1.25	0.64	5.06	0	0	1	0	1	0	3	7	0	1	0	0	0	0	0	1	0
2	1	0	1	0	0	58.06	0	73	130	80	1.54	0.56	4.38	0	0	0	0	1	0	2	7	0	1	0	0	0	0	0	1	0
1	1	0	1	0	1	38.05	0	87	140	80	1.64	0.54	4.85	0	0	0	0	1	0	2	7	0	1	0	0	0	0	0	1	0
1	1	0	1	0	1	32	0	83	138	80	1.62	0.5	5.23	0	0	0	0	1	0	2	7	0	1	0	0	0	0	0	1	0
1	1	0	1	0	1	32.06	0	78	130	80	1.14	0.72	7.49	0	0	0	1	1	0	3	7	0	1	0	0	0	0	0	1	0
1	1	0	1	0	1	26.1	0	77	138	100	1.29	1.15	6.53	0	0	0	1	1	0	3	7	0	1	0	0	0	0	0	1	0
1	1	0	1	0	0	26.04	0	92	139	94	16	0.62	5.33	0	0	0	0	1	1	3	3	0	1	0	0	1	0	1	0	0
1	1	0	1	0	0	35	0	103	130	80	1.2	0.74	5.06	0	0	0	0	1	1	3	3	0	1	0	0	1	0	1	0	0
1	1	0	1	0	0	63.07	0	93	140	100	0.8	0.85	6.69	1	0	1	1	1	1	5	5	0	1	0	0	1	0	1	0	0
1	1	0	1	0	0	49.11	0	90	130	80	1.29	1.04	5.85	1	0	0	1	1	1	4	4	0	1	0	0	1	0	1	0	0
1	1	0	1	0	0	44.08	0	91	150	100	1.46	1.1	6.52	1	0	0	1	1	1	4	4	0	1	0	0	1	0	1	0	0
1	1	0	1	0	0	47	0	106	152	110	1.13	0.82	5.98	1	0	0	1	1	1	4	4	0	1	0	0	1	0	1	0	0
2	1	0	1	0	0	57.04	0	88	140	90	1.97	0.76	4.59	0	0	0	0	1	1	3	3	0	1	0	0	1	0	1	0	0
1	1	0	1	0	1	49.1	0	99	132	82	0.73	1.01	10.38	1	0	1	1	1	1	5	5	0	1	0	0	1	0	1	0	0
2	1	0	1	0	0	61.06	0	87	150	90	1.63	0.91	6.9	1	0	0	1	1	1	4	4	0	1	0	0	1	0	1	0	0
1	1	1	1	0	0	51.06	0	86.2	151	96	1.63	0.72	4.3	1	1	1	0	1	0	4	7	0	1	0	0	0	0	0	1	0
1	1	1	1	0	0	65.06	0	87	133	88	1.58	1.45	5.28	1	1	1	0	1	0	4	7	0	1	0	0	0	0	0	1	0
1	1	1	1	0	0	37.02	0	94	146	99	1.27	2.71	4.32	1	1	0	0	1	1	4	4	0	1	0	0	1	0	1	0	0
1	1	1	1	1	0	53.11	0	85	130	82.5	1.63	1.32	5.9	0	0	0	1	1	0	3	7	0	1	0	0	0	0	0	1	0
1	1	1	1	0	0	41.09	0	85	138	79	1.99	0.47	4.38	0	0	0	0	1	0	2	7	0	1	0	0	0	0	0	1	0
1	1	1	1	0	0	35.06	0	82	137	91	2.3	0.8	4.73	0	0	0	0	1	0	2	7	0	1	0	0	0	0	0	1	0
1	1	1	1	0	0	40.11	0	66	141	114	3.62	1.51	3.68	0	0	0	0	1	0	2	7	0	1	0	0	0	0	0	1	0
1	1	1	1	0	0	40.04	0	82	130	90.5	1.44	0.64	4.8	0	0	0	0	1	0	2	7	0	1	0	0	0	0	0	1	0
1	1	1	1	0	0	31.04	0	86.8	149	92	1.19	1.04	5.15	0	0	0	0	1	0	2	7	0	1	0	0	0	0	0	1	0
1	1	1	1	0	0	47.11	0	82	130	80	1	0.73	7.45	1	0	1	1	1	0	4	7	0	1	0	0	0	0	0	1	0
1	1	1	1	0	0	44.01	0	81	130	91	0.97	1.32	8.36	1	0	1	1	1	0	4	7	0	1	0	0	0	0	0	1	0
1	1	1	1	0	0	58.03	0	82	149	108	0.91	0.67	9.1	1	0	1	1	1	0	4	7	0	1	0	0	0	0	0	1	0
1	1	1	1	0	0	71.09	0	88	139	80	1.86	1.41	5.8	0	0	0	1	1	0	3	7	0	1	0	0	0	0	0	1	0
1	1	1	1	0	1	31.09	0	72	122	85	2.21	0.49	5.59	0	0	0	0	1	0	2	7	0	1	0	0	0	0	0	1	0
1	1	1	1	0	0	52.11	0	105	151	99	0.96	1.07	5.35	1	0	1	0	1	1	4	4	0	1	0	0	1	0	1	0	0
1	1	1	1	1	1	36.11	0	90	140	80	0.98	1.37	5.53	1	0	1	0	1	1	4	4	0	1	0	0	1	0	1	0	0
1	1	1	1	0	0	49.09	0	93.4	135	92	1.53	0.55	5.6	1	0	0	1	1	1	4	4	0	1	0	0	1	0	1	0	0
1	1	1	1	0	0	56.02	0	100	134	88	1.13	1.08	6.3	1	0	0	1	1	1	4	4	0	1	0	0	1	0	1	0	0
1	1	1	1	0	1	42.1	0	98	155	110	1.73	0.83	6.7	1	0	0	1	1	1	4	4	0	1	0	0	1	0	1	0	0
1	1	1	1	0	0	50	0	72	138	80	0.67	1.76	4.83	1	1	1	0	1	0	4	7	0	1	0	0	0	0	0	1	0
1	1	1	1	0	0	50.04	0	85	144	90	1.47	2.17	2.82	0	1	0	0	1	0	3	7	0	1	0	0	0	0	0	1	0
1	1	1	1	0	0	53.04	0	94	130	80	0.88	2.08	5.02	1	1	1	0	1	1	5	5	0	1	0	0	1	0	1	0	0
1	1	1	1	0	0	72	0	101	193	120	0.87	3.4	4.72	1	1	1	0	1	1	5	5	0	1	0	0	1	0	1	0	0
1	1	1	1	0	0	40.05	0	103	140	90	0.99	1.78	4.98	1	1	1	0	1	1	5	5	0	1	0	0	1	0	1	0	0
1	1	1	1	0	0	63.11	0	97	134	80	1.09	2.2	5.19	1	1	0	0	1	1	4	4	0	1	0	0	1	0	1	0	0
1	1	1	1	0	0	52.1	0	93	142	103	1.53	1.83	4.03	1	1	0	0	1	1	4	4	0	1	0	0	1	0	1	0	0
1	1	1	1	0	0	43.08	0	105	150	110	1.38	1.25	6.52	1	1	1	1	1	1	6	6	1	0	0	1	0	0	1	0	0
1	1	1	1	0	0	59.06	0	102	152	70	1.04	2.09	6.51	1	1	1	1	1	1	6	6	1	0	0	1	0	0	1	0	0
1	1	1	1	0	0	35.04	0	79	130	80	1.23	0.91	5.21	0	0	0	0	1	0	2	7	0	1	0	0	0	0	0	1	0
1	1	1	1	0	0	46	0	83	140	90	1.55	1.57	6.2	0	0	0	1	1	0	3	7	0	1	0	0	0	0	0	1	0
2	1	1	1	0	0	39.09	0	77	130	100	2.85	0.34	5.52	0	0	0	0	1	0	2	7	0	1	0	0	0	0	0	1	0
1	1	1	1	0	1	36.09	0	84	128	86	0.9	1.2	6.23	1	0	1	1	1	0	4	7	0	1	0	0	0	0	0	1	0
1	1	1	1	0	1	38.04	0	80	123	85	1.3	1.46	6.17	0	0	0	1	1	0	3	7	0	1	0	0	0	0	0	1	0
1	1	1	1	0	1	41.1	0	91	157	91	1.02	1.24	5.17	1	0	1	0	1	1	4	4	0	1	0	0	1	0	1	0	0
1	0	0	1	0	0	43.05	0	99	142	92	1.45	1.94	5.53	1	1	0	0	1	1	4	4	0	1	0	0	1	0	1	0	0
1	0	0	1	0	0	41.09	0	109.5	122	88	1.86	1.46	5.7	1	1	1	1	1	1	6	6	1	0	0	1	0	0	1	0	0
2	0	0	1	0	0	61.05	0	91	130	80	1.87	0.57	5.21	1	1	1	0	1	1	5	5	0	1	0	0	1	0	1	0	0
2	0	0	1	0	0	49.09	0	83	135	93	1.86	0.61	4.7	1	1	1	0	1	1	5	5	0	1	0	0	1	0	1	0	0
2	0	0	1	0	0	30.1	0	104.1	123	89	1.08	3.28	5.53	1	1	1	0	1	1	5	5	0	1	0	0	1	0	1	0	0
2	0	0	1	0	0	31.01	0	115	124	88	2.11	2.68	3.77	1	1	0	0	1	1	4	4	0	1	0	0	1	0	1	0	0
1	0	0	1	0	1	58.1	0	101	185	97	1.3	2.2	5.5	1	1	0	0	1	1	4	4	0	1	0	0	1	0	1	0	0
2	0	0	1	0	0	51.05	0	92	134	80	2.3	1.14	5.9	1	1	1	1	1	1	6	6	1	0	0	1	0	0	1	0	0
2	0	0	1	0	0	48.05	0	94	147	93	1.78	0.7	6.2	1	1	1	1	1	1	6	6	1	0	0	1	0	0	1	0	0
2	0	0	1	0	0	36.1	0	93	150	99	0.93	1.9	6.62	1	1	1	1	1	1	6	6	1	0	0	1	0	0	1	0	0
2	0	0	1	0	1	32.02	0	100	160	120	1.41	1.78	5.15	1	1	0	0	1	1	4	4	0	1	0	0	1	0	1	0	0
1	0	0	1	0	0	47.05	0	84.4	142	80	0.83	0.56	4.69	0	0	1	0	1	0	3	7	0	1	0	0	0	0	0	1	0
1	0	0	1	0	0	38.02	0	82	108	89	1.57	0.33	5	0	0	0	0	1	0	2	7	0	1	0	0	0	0	0	1	0
1	0	0	1	0	0	41.05	0	70	140	90	1.75	1.33	4.65	0	0	0	0	1	0	2	7	0	1	0	0	0	0	0	1	0
1	0	0	1	0	0	31.09	0	78	138	70	1.25	1.17	5.59	0	0	0	0	1	0	2	7	0	1	0	0	0	0	0	1	0
1	0	0	1	0	0	39.07	0	66	118	86	1.16	0.56	3.96	0	0	0	0	1	0	2	7	0	1	0	0	0	0	0	1	0
1	0	0	1	0	0	40.05	0	76	136	88	1.45	0.41	4.29	0	0	0	0	1	0	2	7	0	1	0	0	0	0	0	1	0
1	0	0	1	0	0	48.01	0	74	156	108	1.32	0.42	5.29	0	0	0	0	1	0	2	7	0	1	0	0	0	0	0	1	0
1	0	0	1	0	0	47.11	0	77	130	91	1.19	0.6	5.39	0	0	0	0	1	0	2	7	0	1	0	0	0	0	0	1	0
1	0	0	1	0	0	35.08	0	80	145	86	1.81	0.95	6.1	0	0	0	1	1	0	3	7	0	1	0	0	0	0	0	1	0
1	0	0	1	0	0	41.06	0	80	130	80	1.39	0.75	6.04	0	0	0	1	1	0	3	7	0	1	0	0	0	0	0	1	0
1	0	0	1	0	0	42.08	0	70	133	103.5	1.06	0.47	5.62	0	0	0	1	1	0	3	7	0	1	0	0	0	0	0	1	0
2	0	0	1	0	0	32	0	64	120	86	1.15	0.89	4.78	0	0	1	0	1	0	3	7	0	1	0	0	0	0	0	1	0
2	0	0	1	0	0	39.09	0	69	130	68	1.04	1.15	4.24	0	0	1	0	1	0	3	7	0	1	0	0	0	0	0	1	0
2	0	0	1	0	0	24.09	0	75	130	72.5	1.01	0.63	5.5	0	0	1	0	1	0	3	7	0	1	0	0	0	0	0	1	0
2	0	0	1	0	0	31.08	0	68	130	94	1.1	0.67	5.49	0	0	1	0	1	0	3	7	0	1	0	0	0	0	0	1	0
2	0	0	1	0	0	34.1	0	78.2	182	105	1.28	0.64	4.33	0	0	1	0	1	0	3	7	0	1	0	0	0	0	0	1	0
2	0	0	1	0	0	34.02	0	76.8	130	81	1.16	1.07	5.4	0	0	1	0	1	0	3	7	0	1	0	0	0	0	0	1	0
1	0	0	1	0	1	29.04	0	88	145	88	0.65	0.58	5.33	0	0	1	0	1	0	3	7	0	1	0	0	0	0	0	1	0
2	0	0	1	0	0	23.08	0	70	134	67	1.3	0.71	4.79	0	0	0	0	1	0	2	7	0	1	0	0	0	0	0	1	0
2	0	0	1	0	0	32.05	0	71	138	76	1.46	0.61	5.43	0	0	0	0	1	0	2	7	0	1	0	0	0	0	0	1	0
2	0	0	1	0	0	36.1	0	75	117.5	87.5	1.39	0.52	4.3	0	0	0	0	1	0	2	7	0	1	0	0	0	0	0	1	0
2	0	0	1	0	0	28.08	0	74	130	80	1.32	0.49	5.08	0	0	0	0	1	0	2	7	0	1	0	0	0	0	0	1	0
2	0	0	1	0	0	32.03	0	73	130	85	1.56	1.34	4.77	0	0	0	0	1	0	2	7	0	1	0	0	0	0	0	1	0
2	0	0	1	0	0	32.06	0	73	139	91	1.89	0.44	5.13	0	0	0	0	1	0	2	7	0	1	0	0	0	0	0	1	0
2	0	0	1	0	0	34.1	0	66	131	87	1.3	0.44	5.34	0	0	0	0	1	0	2	7	0	1	0	0	0	0	0	1	0
2	0	0	1	0	0	43.01	0	73	130	96	1.93	0.71	5.35	0	0	0	0	1	0	2	7	0	1	0	0	0	0	0	1	0
2	0	0	1	0	0	41.06	0	68	134	86	1.55	0.49	4.26	0	0	0	0	1	0	2	7	0	1	0	0	0	0	0	1	0
2	0	0	1	0	0	42.02	0	74	143	90	1.78	0.51	5.2	0	0	0	0	1	0	2	7	0	1	0	0	0	0	0	1	0
1	0	0	1	0	1	29.1	0	75	130	83	1.28	1.45	4.88	0	0	0	0	1	0	2	7	0	1	0	0	0	0	0	1	0
2	0	0	1	0	0	46.05	0	73	158	96	1.45	0.71	7.49	0	0	0	1	1	0	3	7	0	1	0	0	0	0	0	1	0
2	0	0	1	0	0	53.08	0	76	145	95	2.09	1.08	5.9	0	0	0	1	1	0	3	7	0	1	0	0	0	0	0	1	0
2	0	0	1	0	0	38.08	0	72	140	86	1.9	0.52	5.9	0	0	0	1	1	0	3	7	0	1	0	0	0	0	0	1	0
1	0	0	1	0	0	39.07	0	97	143	89	0.9	1.16	5.22	1	0	1	0	1	1	4	4	0	1	0	0	1	0	1	0	0
1	0	0	1	0	0	42.04	0	94	134	90	1.62	0.77	5.4	0	0	0	0	1	1	3	3	0	1	0	0	1	0	1	0	0
1	0	0	1	0	0	39.1	0	95.6	138	81	1.33	1.16	4.16	0	0	0	0	1	1	3	3	0	1	0	0	1	0	1	0	0
1	0	0	1	0	0	49.08	0	101.5	147	90	1.51	0.91	5.5	0	0	0	0	1	1	3	3	0	1	0	0	1	0	1	0	0
1	0	0	1	0	0	36.06	0	92	149	87	1.32	0.54	4.8	0	0	0	0	1	1	3	3	0	1	0	0	1	0	1	0	0
1	0	0	1	0	0	60.06	0	94	145	88	1.3	0.41	5.6	1	0	0	1	1	1	4	4	0	1	0	0	1	0	1	0	0
1	0	0	1	0	0	55.09	0	97.5	160	100	1.32	0.76	5.8	1	0	0	1	1	1	4	4	0	1	0	0	1	0	1	0	0
2	0	0	1	0	1	57.11	0	79	138	82	2.24	0.76	6.1	0	0	0	1	1	0	3	7	0	1	0	0	0	0	0	1	0
2	0	0	1	0	0	79.11	0	100	139	81	1.18	1.44	4.68	1	0	1	0	1	1	4	4	0	1	0	0	1	0	1	0	0
2	0	0	1	0	0	45.07	0	80	118	90	1.28	0.94	5.5	1	0	1	0	1	1	4	4	0	1	0	0	1	0	1	0	0
2	0	0	1	0	0	38	0	82	132	89	1.08	0.37	5.2	1	0	1	0	1	1	4	4	0	1	0	0	1	0	1	0	0
2	0	0	1	0	0	43.07	0	80	138	96	1.29	0.71	4.7	1	0	1	0	1	1	4	4	0	1	0	0	1	0	1	0	0
2	0	0	1	0	0	30.09	0	80	140	88	1.27	0.7	3.61	1	0	1	0	1	1	4	4	0	1	0	0	1	0	1	0	0
2	0	0	1	0	0	49.04	0	82	144	98	1.16	0.87	4.89	1	0	1	0	1	1	4	4	0	1	0	0	1	0	1	0	0
2	0	0	1	0	0	48.09	0	86	132	83	1.01	0.84	5.17	1	0	1	0	1	1	4	4	0	1	0	0	1	0	1	0	0
2	0	0	1	0	0	47.05	0	91	137	84	1.16	1.06	4.11	1	0	1	0	1	1	4	4	0	1	0	0	1	0	1	0	0
2	0	0	1	0	0	34.08	0	81	132	69	1.32	0.61	5.25	0	0	0	0	1	1	3	3	0	1	0	0	1	0	1	0	0
2	0	0	1	0	0	38.06	0	81	136	88	1.57	0.73	3.49	0	0	0	0	1	1	3	3	0	1	0	0	1	0	1	0	0
2	0	0	1	0	0	47.05	0	91	120	86	1.98	1.3	5.02	0	0	0	0	1	1	3	3	0	1	0	0	1	0	1	0	0
2	0	0	1	0	0	46.1	0	103	143	105	1.55	1.03	5.2	0	0	0	0	1	1	3	3	0	1	0	0	1	0	1	0	0
2	0	0	1	0	0	51.08	0	91	139	89	1.47	0.58	4.6	0	0	0	0	1	1	3	3	0	1	0	0	1	0	1	0	0
2	0	0	1	0	0	51.08	0	95	123	98	1.6	0.63	5.2	0	0	0	0	1	1	3	3	0	1	0	0	1	0	1	0	0
2	0	0	1	0	0	28.09	0	86	135.5	89	1.64	1.21	5.4	0	0	0	0	1	1	3	3	0	1	0	0	1	0	1	0	0
2	0	0	1	0	0	29.01	0	88	132	84	1.49	0.82	4.59	0	0	0	0	1	1	3	3	0	1	0	0	1	0	1	0	0
2	0	0	1	0	0	46.05	0	88	130	100	1.74	1.63	4.08	0	0	0	0	1	1	3	3	0	1	0	0	1	0	1	0	0
2	0	0	1	0	0	40.08	0	105	129	88	1.34	1.59	5.05	0	0	0	0	1	1	3	3	0	1	0	0	1	0	1	0	0
2	0	0	1	0	0	36.08	0	86	150	93	1.82	0.52	5.29	0	0	0	0	1	1	3	3	0	1	0	0	1	0	1	0	0
2	0	0	1	0	0	44.09	0	98	137	95	1.41	1.67	3.59	0	0	0	0	1	1	3	3	0	1	0	0	1	0	1	0	0
2	0	0	1	0	0	42.02	0	99	141	91	1.69	0.7	5.4	0	0	0	0	1	1	3	3	0	1	0	0	1	0	1	0	0
2	0	0	1	0	0	38.11	0	96	120	100	1.43	1.1	5.4	0	0	0	0	1	1	3	3	0	1	0	0	1	0	1	0	0
2	0	0	1	0	0	42.09	0	102	175	120	1.99	0.77	5.3	0	0	0	0	1	1	3	3	0	1	0	0	1	0	1	0	0
2	0	0	1	0	0	47.07	0	94.3	126	95	1.55	0.57	8.4	1	0	0	1	1	1	4	4	0	1	0	0	1	0	1	0	0
2	0	0	1	0	0	61.07	0	97	136	76	1.67	1.62	5.7	1	0	0	1	1	1	4	4	0	1	0	0	1	0	1	0	0
2	0	0	1	0	0	51.02	0	92	114	85	1.96	0.66	6	1	0	0	1	1	1	4	4	0	1	0	0	1	0	1	0	0
2	0	0	1	0	0	61.08	0	112	158	100	1.5	1.05	6.76	1	0	0	1	1	1	4	4	0	1	0	0	1	0	1	0	0
2	0	0	1	0	0	37.08	0	89	132	86	1.49	1.21	5.9	1	0	0	1	1	1	4	4	0	1	0	0	1	0	1	0	0
2	0	0	1	0	0	37.08	0	101	138	89	1.91	1.1	5.7	1	0	0	1	1	1	4	4	0	1	0	0	1	0	1	0	0
2	0	0	1	0	1	28.11	0	83	112	89	1.31	0.98	5.5	0	0	0	0	1	1	3	3	0	1	0	0	1	0	1	0	0
2	0	0	1	0	1	50.04	0	89	139	97	1.5	1.14	3.94	0	0	0	0	1	1	3	3	0	1	0	0	1	0	1	0	0
2	0	0	1	0	1	42.09	0	90	143	109	1.93	0.63	5.1	0	0	0	0	1	1	3	3	0	1	0	0	1	0	1	0	0
2	0	0	1	0	1	40.02	0	82.3	129	89	1.14	0.58	5.76	1	0	1	1	1	1	5	5	0	1	0	0	1	0	1	0	0
2	0	0	1	0	1	57.04	0	86	136	84	1.24	1.36	5.6	1	0	1	1	1	1	5	5	0	1	0	0	1	0	1	0	0
2	0	0	1	0	1	53.04	0	98.6	144	99	1.85	0.7	5.7	1	0	0	1	1	1	4	4	0	1	0	0	1	0	1	0	0
1	0	0	1	0	0	36.06	0	86	132	82	0.68	1.7	4.77	1	1	1	0	1	0	4	7	0	1	0	0	0	0	0	1	0
1	0	0	1	0	0	51.03	0	83	135	82	1.48	2.89	5.52	0	1	0	0	1	0	3	7	0	1	0	0	0	0	0	1	0
1	0	0	1	0	0	25.08	0	83	130	81	1.11	2.89	6.31	1	1	0	1	1	0	4	7	0	1	0	0	0	0	0	1	0
2	0	0	1	0	0	44	0	78	150	100	0.99	6.2	4.92	1	1	1	0	1	0	4	7	0	1	0	0	0	0	0	1	0
2	0	0	1	0	0	46	0	72	136.5	90	1.24	5.5	6.36	1	1	1	1	1	0	5	7	1	0	0	0	0	1	0	1	0
2	0	0	1	0	0	40.09	0	71	130	90	0.53	0.62	5.75	1	1	1	1	1	0	5	7	1	0	0	0	0	1	0	1	0
1	0	0	1	0	1	25	0	67	130	80	0.48	3.9	6.79	1	1	1	1	1	0	5	7	1	0	0	0	0	1	0	1	0
1	0	0	1	0	0	43.07	0	90	130	98	0.79	2.89	5.58	1	1	1	0	1	1	5	5	0	1	0	0	1	0	1	0	0
1	0	0	1	0	0	33.08	0	103	150	100	0.77	3.04	4.42	1	1	1	0	1	1	5	5	0	1	0	0	1	0	1	0	0
1	0	0	1	0	0	49	0	93	142	90	0.86	2.65	5.26	1	1	1	0	1	1	5	5	0	1	0	0	1	0	1	0	0
1	0	0	1	0	0	40	0	97	158	100	0.94	4.4	5.23	1	1	1	0	1	1	5	5	0	1	0	0	1	0	1	0	0
1	0	0	1	0	0	39.09	0	102	156	104	0.97	4.86	5.36	1	1	1	0	1	1	5	5	0	1	0	0	1	0	1	0	0
2	0	0	1	0	0	35	0	90	130	80	1.45	0.55	5.07	1	1	1	0	1	1	5	5	0	1	0	0	1	0	1	0	0
2	0	0	1	0	0	51.09	0	102	140	100	1.44	1.21	5.18	1	1	1	0	1	1	5	5	0	1	0	0	1	0	1	0	0
2	0	0	1	0	0	41.06	0	80	156	108	1.13	0.99	4.71	1	1	1	0	1	1	5	5	0	1	0	0	1	0	1	0	0
2	0	0	1	0	0	49.08	0	92	130	90	1.42	2.09	4.36	1	1	1	0	1	1	5	5	0	1	0	0	1	0	1	0	0
2	0	0	1	0	0	41.1	0	88	140	90	1.02	2.55	5.12	1	1	1	0	1	1	5	5	0	1	0	0	1	0	1	0	0
2	0	0	1	0	0	37	0	92	160	90	0.95	3.1	3.72	1	1	1	0	1	1	5	5	0	1	0	0	1	0	1	0	0
2	0	0	1	0	0	48	0	100	139	87	1.21	1.72	5.29	1	1	1	0	1	1	5	5	0	1	0	0	1	0	1	0	0
2	0	0	1	0	0	27.03	0	83	130	81	1.64	1.79	4.04	1	1	0	0	1	1	4	4	0	1	0	0	1	0	1	0	0
2	0	0	1	0	0	49.11	0	87	138	77	1.11	0.86	6.5	1	1	1	1	1	1	6	6	1	0	0	1	0	0	1	0	0
2	0	0	1	0	0	42.05	0	98	156	100	1.11	2.76	6.15	1	1	1	1	1	1	6	6	1	0	0	1	0	0	1	0	0
2	0	0	1	0	1	53.1	0	80	122	88	0.71	1.95	6.54	1	1	1	1	1	1	6	6	1	0	0	1	0	0	1	0	0
1	0	0	1	0	0	22	0	77	136	86	0.74	0.96	4.71	0	0	1	0	1	0	3	7	0	1	0	0	0	0	0	1	0
1	0	0	1	0	0	40.09	0	84	152	80	1.64	1.54	4.84	0	0	0	0	1	0	2	7	0	1	0	0	0	0	0	1	0
1	0	0	1	0	0	22.11	0	77	131	82	1.32	0.55	4.19	0	0	0	0	1	0	2	7	0	1	0	0	0	0	0	1	0
1	0	0	1	0	0	29	0	72	130	80	1.48	0.8	5.51	0	0	0	0	1	0	2	7	0	1	0	0	0	0	0	1	0
1	0	0	1	0	0	22.11	0	69	140	90	1.38	0.99	5.56	0	0	0	0	1	0	2	7	0	1	0	0	0	0	0	1	0
1	0	0	1	0	0	21.07	0	75	132	80	1.07	0.63	4.84	0	0	0	0	1	0	2	7	0	1	0	0	0	0	0	1	0
1	0	0	1	0	0	45.04	0	77	160	110	1.22	1.49	4.77	0	0	0	0	1	0	2	7	0	1	0	0	0	0	0	1	0
1	0	0	1	0	0	30	0	88	127	88	1.58	0.89	5.02	0	0	0	0	1	0	2	7	0	1	0	0	0	0	0	1	0
1	0	0	1	0	0	54	0	82	141	100	1.37	0.68	4.03	0	0	0	0	1	0	2	7	0	1	0	0	0	0	0	1	0
1	0	0	1	0	0	39	0	61	130	80	0.71	0.98	5.67	1	0	1	1	1	0	4	7	0	1	0	0	0	0	0	1	0
1	0	0	1	0	0	29.05	0	76	152	90	2.04	0.82	7.56	0	0	0	1	1	0	3	7	0	1	0	0	0	0	0	1	0
1	0	0	1	0	0	34.06	0	66	144	90	1.39	0.95	7.88	0	0	0	1	1	0	3	7	0	1	0	0	0	0	0	1	0
1	0	0	1	0	0	33.06	0	79	130	100	1.48	0.8	8.31	0	0	0	1	1	0	3	7	0	1	0	0	0	0	0	1	0
1	0	0	1	0	0	20.05	0	74	130	83	1.14	0.98	5.61	0	0	0	1	1	0	3	7	0	1	0	0	0	0	0	1	0
2	0	0	1	0	0	20	0	77	130	80	1.1	1.03	5.16	0	0	1	0	1	0	3	7	0	1	0	0	0	0	0	1	0
2	0	0	1	0	0	32	0	69	130	88	1.12	0.71	5.16	0	0	1	0	1	0	3	7	0	1	0	0	0	0	0	1	0
2	0	0	1	0	0	27.05	0	61	130	70	0.82	0.64	4.13	0	0	1	0	1	0	3	7	0	1	0	0	0	0	0	1	0
2	0	0	1	0	0	39	0	72	142	90	1.04	0.85	3.76	0	0	1	0	1	0	3	7	0	1	0	0	0	0	0	1	0
2	0	0	1	0	0	54	0	72	240	140	1.24	0.81	5.06	0	0	1	0	1	0	3	7	0	1	0	0	0	0	0	1	0
2	0	0	1	0	0	44.08	0	72	190	125	0.97	0.72	5.46	0	0	1	0	1	0	3	7	0	1	0	0	0	0	0	1	0
2	0	0	1	0	0	37	0	76	140	86	1.06	1.12	3.7	0	0	1	0	1	0	3	7	0	1	0	0	0	0	0	1	0
1	0	0	1	0	1	24.06	0	70	140	96	0.92	0.78	4.73	0	0	1	0	1	0	3	7	0	1	0	0	0	0	0	1	0
2	0	0	1	0	0	36	0	57	130	84	1.72	0.99	5.03	0	0	0	0	1	0	2	7	0	1	0	0	0	0	0	1	0
2	0	0	1	0	0	46.1	0	73	150	90	1.6	0.77	4.36	0	0	0	0	1	0	2	7	0	1	0	0	0	0	0	1	0
1	0	0	1	0	1	26.1	0	80	128	88	1.47	0.65	4.07	0	0	0	0	1	0	2	7	0	1	0	0	0	0	0	1	0
1	0	0	1	0	1	47.09	0	73	130	90	1.71	0.52	3.83	0	0	0	0	1	0	2	7	0	1	0	0	0	0	0	1	0
2	0	0	1	0	0	33	0	72	170	100	0.81	1.09	6.02	1	0	1	1	1	0	4	7	0	1	0	0	0	0	0	1	0
2	0	0	1	0	0	73	0	78	146	90	1.58	0.54	9.94	0	0	0	1	1	0	3	7	0	1	0	0	0	0	0	1	0
2	0	0	1	0	0	20.1	0	71	130	60	1.83	1.53	6.22	0	0	0	1	1	0	3	7	0	1	0	0	0	0	0	1	0
2	0	0	1	0	0	36.09	0	79	130	90	1.48	0.74	6.44	0	0	0	1	1	0	3	7	0	1	0	0	0	0	0	1	0
2	0	0	1	0	0	39	0	76	152	102	1.3	0.9	6.55	0	0	0	1	1	0	3	7	0	1	0	0	0	0	0	1	0
1	0	0	1	0	0	63.1	0	97	175	110	0.95	0.56	4.78	1	0	1	0	1	1	4	4	0	1	0	0	1	0	1	0	0
2	0	0	1	0	1	37.11	0	69	170	90	1.47	0.8	4.96	0	0	0	0	1	0	2	7	0	1	0	0	0	0	0	1	0
1	0	0	1	0	0	50.04	0	96	160	90	1.45	1.27	6.48	1	0	0	1	1	1	4	4	0	1	0	0	1	0	1	0	0
2	0	0	1	0	0	27	0	80	146	92	1	1.04	4.56	1	0	1	0	1	1	4	4	0	1	0	0	1	0	1	0	0
2	0	0	1	0	0	45	0	93	130	80	1.27	1.28	5.58	1	0	1	0	1	1	4	4	0	1	0	0	1	0	1	0	0
2	0	0	1	0	0	52	0	100	130	90	0.86	0.54	4.48	1	0	1	0	1	1	4	4	0	1	0	0	1	0	1	0	0
2	0	0	1	0	0	31.11	0	90	130	70	1.17	1.14	3.83	1	0	1	0	1	1	4	4	0	1	0	0	1	0	1	0	0
2	0	0	1	0	0	37	0	90	160	100	1.19	0.68	5.34	1	0	1	0	1	1	4	4	0	1	0	0	1	0	1	0	0
2	0	0	1	0	0	44.1	0	83	152	84	1.72	0.99	4.62	0	0	0	0	1	1	3	3	0	1	0	0	1	0	1	0	0
2	0	0	1	0	0	29	0	80	140	90	1.36	0.96	4.87	0	0	0	0	1	1	3	3	0	1	0	0	1	0	1	0	0
2	0	0	1	0	0	47.11	0	82	150	110	1.72	0.94	5.06	0	0	0	0	1	1	3	3	0	1	0	0	1	0	1	0	0
2	0	0	1	0	0	37.08	0	83	200	120	1.46	1.08	5.5	0	0	0	0	1	1	3	3	0	1	0	0	1	0	1	0	0
2	0	0	1	0	0	55.05	0	94	170	110	1.5	0.96	5.23	0	0	0	0	1	1	3	3	0	1	0	0	1	0	1	0	0
2	0	0	1	0	0	48.08	0	91	160	110	1.64	1.28	5.36	0	0	0	0	1	1	3	3	0	1	0	0	1	0	1	0	0
2	0	0	1	0	0	31.09	0	86	130	70	0.89	1.09	5.91	1	0	1	1	1	1	5	5	0	1	0	0	1	0	1	0	0
2	0	0	1	0	0	59.11	0	118	148	90	1.21	1.25	6.47	1	0	1	1	1	1	5	5	0	1	0	0	1	0	1	0	0
2	0	0	1	0	0	31.05	0	95	130	80	0.95	0.89	6.21	1	0	1	1	1	1	5	5	0	1	0	0	1	0	1	0	0
2	0	0	1	0	0	30	0	96	140	90	0.93	1.42	6.33	1	0	1	1	1	1	5	5	0	1	0	0	1	0	1	0	0
2	0	0	1	0	0	25.08	0	87	131	90	1.98	1.12	5.88	1	0	0	1	1	1	4	4	0	1	0	0	1	0	1	0	0
2	0	0	1	0	0	23.06	0	98	140	90	1.39	1.58	5.87	1	0	0	1	1	1	4	4	0	1	0	0	1	0	1	0	0
1	0	1	1	0	0	43.09	0	74	110	90	1.55	1.08	4.72	1	1	1	0	1	0	4	7	0	1	0	0	0	0	0	1	0
1	0	1	1	0	0	52.11	0	73	138	60	1.65	0.77	4.21	0	0	0	0	1	0	2	7	0	1	0	0	0	0	0	1	0
1	0	1	1	0	0	47.06	0	70	138	88	1.66	0.39	5.55	0	0	0	0	1	0	2	7	0	1	0	0	0	0	0	1	0
1	0	1	1	0	0	48.09	0	101	129	90	1.61	0.64	5	0	0	0	0	1	1	3	3	0	1	0	0	1	0	1	0	0
2	0	1	1	0	0	41.05	0	71	150	80	1.3	0.61	4.05	1	1	1	0	1	0	4	7	0	1	0	0	0	0	0	1	0
1	0	1	1	0	0	27.08	0	83	130	80	1.36	1.44	5.13	0	0	0	0	1	0	2	7	0	1	0	0	0	0	0	1	0
1	0	1	1	0	0	43.04	0	84	148	100	2.29	1.06	4.85	0	0	0	0	1	0	2	7	0	1	0	0	0	0	0	1	0
1	0	1	1	0	1	43.04	0	96	138	101	1.14	0.85	4.97	0	0	0	0	1	1	3	3	0	1	0	0	1	0	1	0	0
1	1	0	0	0	0	44.08	0	85	126	87	1.14	2.12	3.36	0	1	0	0	1	0	3	7	0	1	0	0	0	0	0	1	0
1	1	0	0	0	0	57.06	0	70	131	89	1.44	1.73	5.2	0	1	0	0	1	0	3	7	0	1	0	0	0	0	0	1	0
1	1	0	0	0	0	50.01	0	82	147.5	95	1.56	2.78	6.7	1	1	1	1	1	0	5	7	1	0	0	0	0	1	0	1	0
1	1	0	0	0	1	57.03	0	89.8	141	91	2.1	1.26	3.92	1	1	1	0	1	0	4	7	0	1	0	0	0	0	0	1	0
1	1	0	0	0	0	60.04	0	100	174	100	0.87	4.2	4.09	1	1	1	0	1	1	5	5	0	1	0	0	1	0	1	0	0
1	1	0	0	0	0	40.11	0	94	134	88	1.18	3.42	5.43	1	1	0	0	1	1	4	4	0	1	0	0	1	0	1	0	0
1	1	0	0	0	0	28.02	0	96	134	84	1.22	4.55	3.95	1	1	0	0	1	1	4	4	0	1	0	0	1	0	1	0	0
1	1	0	0	0	0	58.11	0	102	130	70	0.96	14.79	6.22	1	1	1	1	1	1	6	6	1	0	0	1	0	0	1	0	0
1	1	0	0	0	0	61.06	0	110	143	94	1.35	4.81	6.9	1	1	0	1	1	1	5	5	0	1	0	0	1	0	1	0	0
2	1	0	0	0	0	57.05	0	82.5	149	75	1.58	0.66	5	1	1	1	0	1	1	5	5	0	1	0	0	1	0	1	0	0
2	1	0	0	0	0	42	0	83	148	88	1.16	2.29	9.1	1	1	1	1	1	1	6	6	1	0	0	1	0	0	1	0	0
1	1	0	0	0	1	34.01	0	100	130	70	1.23	1.98	5.75	1	1	1	1	1	1	6	6	1	0	0	1	0	0	1	0	0
1	1	0	0	0	1	54.06	0	107	174	97	1.76	1.82	6.1	1	1	0	1	1	1	5	5	0	1	0	0	1	0	1	0	0
2	1	0	0	0	1	41.06	0	84	150	100	1.11	2.99	6.2	1	1	1	1	1	1	6	6	1	0	0	1	0	0	1	0	0
1	1	0	0	0	0	27.06	0	77	128	87	1.44	1.63	4.69	0	0	0	0	1	0	2	7	0	1	0	0	0	0	0	1	0
1	1	0	0	0	0	49.03	0	76	146	94	1.78	0.62	5.47	0	0	0	0	1	0	2	7	0	1	0	0	0	0	0	1	0
1	1	0	0	0	0	50.07	0	87	125	87	1.41	0.96	4.48	0	0	0	0	1	0	2	7	0	1	0	0	0	0	0	1	0
1	1	0	0	0	0	32.04	0	80.8	133	83	1.15	0.54	4.48	0	0	0	0	1	0	2	7	0	1	0	0	0	0	0	1	0
1	1	0	0	0	0	36.07	0	87	139	100	1.6	0.61	4.87	0	0	0	0	1	0	2	7	0	1	0	0	0	0	0	1	0
1	1	0	0	0	0	40.02	0	80	131	89	1.3	1.49	5.5	0	0	0	0	1	0	2	7	0	1	0	0	0	0	0	1	0
1	1	0	0	0	0	48.06	0	77	146	90	1.39	0.55	4.35	0	0	0	0	1	0	2	7	0	1	0	0	0	0	0	1	0
1	1	0	0	0	0	36.07	0	74	131	85	1.3	1.62	5.35	0	0	0	0	1	0	2	7	0	1	0	0	0	0	0	1	0
1	1	0	0	0	0	60.01	0	84.2	170	89	2.19	1.01	5.31	0	0	0	0	1	0	2	7	0	1	0	0	0	0	0	1	0
1	1	0	0	0	0	41.02	0	85	131	91	1.13	0.55	5.35	0	0	0	0	1	0	2	7	0	1	0	0	0	0	0	1	0
1	1	0	0	0	0	46.09	0	71	142	90	1.09	1	4.41	0	0	0	0	1	0	2	7	0	1	0	0	0	0	0	1	0
1	1	0	0	0	0	70.01	0	79	204	108	0.99	0.94	7.17	1	0	1	1	1	0	4	7	0	1	0	0	0	0	0	1	0
1	1	0	0	0	0	52.03	0	76	132	59	0.89	1.27	6.25	1	0	1	1	1	0	4	7	0	1	0	0	0	0	0	1	0
1	1	0	0	0	0	36.01	0	88	142	79	1.5	1.06	7.52	0	0	0	1	1	0	3	7	0	1	0	0	0	0	0	1	0
1	1	0	0	0	0	40.07	0	80	130	82	1.15	1.16	6.32	0	0	0	1	1	0	3	7	0	1	0	0	0	0	0	1	0
1	1	0	0	0	0	54.11	0	78	170	110	1.91	0.9	5.7	0	0	0	1	1	0	3	7	0	1	0	0	0	0	0	1	0
2	1	0	0	0	0	43.11	0	73	147	80	1.25	0.66	4.6	0	0	1	0	1	0	3	7	0	1	0	0	0	0	0	1	0
2	1	0	0	0	0	40.09	0	61	148	90	1.08	0.7	4.85	0	0	1	0	1	0	3	7	0	1	0	0	0	0	0	1	0
2	1	0	0	0	0	69.11	0	66.5	165	97	1.08	0.94	5.5	0	0	1	0	1	0	3	7	0	1	0	0	0	0	0	1	0
2	1	0	0	0	0	36.08	0	63	130	80	1.17	0.78	5.1	0	0	1	0	1	0	3	7	0	1	0	0	0	0	0	1	0
2	1	0	0	0	0	34.08	0	78	124	88	1.61	1.25	5.42	0	0	0	0	1	0	2	7	0	1	0	0	0	0	0	1	0
2	1	0	0	0	0	37.04	0	76	127	88.5	1.3	1.23	5.4	0	0	0	0	1	0	2	7	0	1	0	0	0	0	0	1	0
2	1	0	0	0	0	45.11	0	76	130	70	1.33	1.33	4.66	0	0	0	0	1	0	2	7	0	1	0	0	0	0	0	1	0
2	1	0	0	0	0	40.09	0	70	133	87	1.62	0.71	5.06	0	0	0	0	1	0	2	7	0	1	0	0	0	0	0	1	0
1	1	0	0	0	1	40.04	0	88	130	88	0.73	0.94	6.08	1	0	1	1	1	0	4	7	0	1	0	0	0	0	0	1	0
2	1	0	0	0	0	46.07	0	78	149	98	2.11	1.41	6.1	0	0	0	1	1	0	3	7	0	1	0	0	0	0	0	1	0
2	1	0	0	0	0	69.02	0	77	167.5	102.5	2.03	0.7	6.2	0	0	0	1	1	0	3	7	0	1	0	0	0	0	0	1	0
1	1	0	0	0	1	52.02	0	78	128	85	1.24	0.96	6.1	0	0	0	1	1	0	3	7	0	1	0	0	0	0	0	1	0
1	1	0	0	0	0	62.05	0	90	123	90	1.27	1.62	5.52	0	0	0	0	1	1	3	3	0	1	0	0	1	0	1	0	0
1	1	0	0	0	0	40.07	0	93	130	85	1.45	1.11	5.5	0	0	0	0	1	1	3	3	0	1	0	0	1	0	1	0	0
1	1	0	0	0	0	51.09	0	90	140	90	1.11	1.09	4.13	0	0	0	0	1	1	3	3	0	1	0	0	1	0	1	0	0
1	1	0	0	0	0	59.06	0	98	126	87	1.06	1.43	2.97	0	0	0	0	1	1	3	3	0	1	0	0	1	0	1	0	0
2	1	0	0	0	1	59.02	0	70	147.5	100	1.03	1.23	5.2	0	0	1	0	1	0	3	7	0	1	0	0	0	0	0	1	0
2	1	0	0	0	1	50.08	0	64	150	90	1.67	0.64	4.79	0	0	0	0	1	0	2	7	0	1	0	0	0	0	0	1	0
1	1	0	0	0	0	53.04	0	90.6	141	97	1.83	1.08	5.9	1	0	0	1	1	1	4	4	0	1	0	0	1	0	1	0	0
1	1	0	0	0	0	49.08	0	94	153	92	1.24	0.89	5.6	1	0	0	1	1	1	4	4	0	1	0	0	1	0	1	0	0
2	1	0	0	0	0	50.07	0	90	130	72	1.06	1.23	4.73	1	0	1	0	1	1	4	4	0	1	0	0	1	0	1	0	0
2	1	0	0	0	0	48.1	0	84.5	149	99	1.05	0.42	4.45	1	0	1	0	1	1	4	4	0	1	0	0	1	0	1	0	0
2	1	0	0	0	0	67.07	0	107	150	106	1.23	1.11	4.6	1	0	1	0	1	1	4	4	0	1	0	0	1	0	1	0	0
2	1	0	0	0	0	53.1	0	83	139	79	1.56	1.11	4.9	0	0	0	0	1	1	3	3	0	1	0	0	1	0	1	0	0
2	1	0	0	0	0	62.08	0	85	129	87	1.48	0.82	4.82	0	0	0	0	1	1	3	3	0	1	0	0	1	0	1	0	0
2	1	0	0	0	0	54.02	0	85	150	80	1.84	1.31	5.12	0	0	0	0	1	1	3	3	0	1	0	0	1	0	1	0	0
2	1	0	0	0	0	61.09	0	87.6	140	94	1.77	1.33	5.2	0	0	0	0	1	1	3	3	0	1	0	0	1	0	1	0	0
2	1	0	0	0	0	46.11	0	80	147	91	1.58	1.64	5.04	0	0	0	0	1	1	3	3	0	1	0	0	1	0	1	0	0
2	1	0	0	0	0	48.05	0	91	127	88	1.93	1.27	4.7	0	0	0	0	1	1	3	3	0	1	0	0	1	0	1	0	0
2	1	0	0	0	0	56.11	0	90.4	148	89	1.52	0.83	4.28	0	0	0	0	1	1	3	3	0	1	0	0	1	0	1	0	0
2	1	0	0	0	0	45.06	0	96	128	100	1.44	1.18	5.29	0	0	0	0	1	1	3	3	0	1	0	0	1	0	1	0	0
2	1	0	0	0	0	54.1	0	88	130	80	1.17	0.8	5.77	1	0	1	1	1	1	5	5	0	1	0	0	1	0	1	0	0
2	1	0	0	0	0	39.09	0	90.1	134	89	1.25	1.37	5.6	1	0	1	1	1	1	5	5	0	1	0	0	1	0	1	0	0
1	1	0	0	0	0	43	0	84	138	98	0.9	5.1	4.63	1	1	1	0	1	0	4	7	0	1	0	0	0	0	0	1	0
1	1	0	0	0	0	26	0	75	138	98	1.48	5.1	4.57	0	1	0	0	1	0	3	7	0	1	0	0	0	0	0	1	0
1	1	0	0	0	0	33	0	75	140	100	1.16	2.3	4.41	0	1	0	0	1	0	3	7	0	1	0	0	0	0	0	1	0
1	1	0	0	0	0	53	0	68	200	140	1.01	2.37	6.77	1	1	1	1	1	0	5	7	1	0	0	0	0	1	0	1	0
2	1	0	0	1	1	36	0	79	131	81	0.59	3.06	5.06	1	1	1	0	1	0	4	7	0	1	0	0	0	0	0	1	0
1	1	0	0	0	0	52	0	90	118	88	0.94	1.89	5.59	1	1	1	0	1	1	5	5	0	1	0	0	1	0	1	0	0
1	1	0	0	0	0	53.02	0	108	169	100	0.81	3.14	5.38	1	1	1	0	1	1	5	5	0	1	0	0	1	0	1	0	0
1	1	0	0	0	0	57	0	93	155	100	0.75	2.22	4.64	1	1	1	0	1	1	5	5	0	1	0	0	1	0	1	0	0
1	1	0	0	0	0	53	0	100	151	110	1.38	5.6	4.81	1	1	0	0	1	1	4	4	0	1	0	0	1	0	1	0	0
1	1	0	0	0	0	29.01	0	98	135	81	0.81	3.29	5.82	1	1	1	1	1	1	6	6	1	0	0	1	0	0	1	0	0
1	1	0	0	0	0	32.07	0	93	148	101	1.23	2.49	5.99	1	1	0	1	1	1	5	5	0	1	0	0	1	0	1	0	0
1	1	0	0	0	0	49	0	132	180	130	1.18	3.7	5.72	1	1	0	1	1	1	5	5	0	1	0	0	1	0	1	0	0
2	1	0	0	0	0	50.82	0	82	120	110	1.14	1.72	5.18	1	1	1	0	1	1	5	5	0	1	0	0	1	0	1	0	0
2	1	0	0	0	0	51	0	89	130	100	0.91	1.94	5.27	1	1	1	0	1	1	5	5	0	1	0	0	1	0	1	0	0
2	1	0	0	0	0	60	0	87	150	100	0.92	3.37	4.96	1	1	1	0	1	1	5	5	0	1	0	0	1	0	1	0	0
2	1	0	0	0	0	39	0	81	140	90	0.94	4.8	4.48	1	1	1	0	1	1	5	5	0	1	0	0	1	0	1	0	0
2	1	0	0	0	0	54.03	0	105	161	98	0.87	2.17	4.87	1	1	1	0	1	1	5	5	0	1	0	0	1	0	1	0	0
1	1	0	0	0	1	60	0	93	130	80	1.47	4.8	4.97	1	1	0	0	1	1	4	4	0	1	0	0	1	0	1	0	0
2	1	0	0	0	0	57	0	90	140	70	0.92	0.74	5.99	1	1	1	1	1	1	6	6	1	0	0	1	0	0	1	0	0
2	1	0	0	0	0	50.92	0	98	130	84	1.53	1.91	5.84	1	1	1	1	1	1	6	6	1	0	0	1	0	0	1	0	0
2	1	0	0	0	0	58	0	82	130	80	0.62	5.52	8.29	1	1	1	1	1	1	6	6	1	0	0	1	0	0	1	0	0
1	1	0	0	0	0	59.09	0	75	160	110	1	0.88	5.51	0	0	1	0	1	0	3	7	0	1	0	0	0	0	0	1	0
1	1	0	0	0	0	31.62	0	77	130	80	1.32	0.68	5.15	0	0	0	0	1	0	2	7	0	1	0	0	0	0	0	1	0
1	1	0	0	0	0	28	0	74	130	83	1.29	1.08	4.88	0	0	0	0	1	0	2	7	0	1	0	0	0	0	0	1	0
1	1	0	0	0	0	30.11	0	82	130	70	1.1	1.4	4.84	0	0	0	0	1	0	2	7	0	1	0	0	0	0	0	1	0
1	1	0	0	0	0	32.06	0	74	130	83	1.26	0.78	5.21	0	0	0	0	1	0	2	7	0	1	0	0	0	0	0	1	0
1	1	0	0	0	0	55.06	0	74	150	100	1.1	0.68	5.44	0	0	0	0	1	0	2	7	0	1	0	0	0	0	0	1	0
1	1	0	0	0	0	45	0	85	130	90	1.24	0.57	5.28	0	0	0	0	1	0	2	7	0	1	0	0	0	0	0	1	0
1	1	0	0	0	0	24.02	0	74	138	80	0.94	1.14	6.11	1	0	1	1	1	0	4	7	0	1	0	0	0	0	0	1	0
1	1	0	0	1	1	58.06	0	78	160	90	1.01	1.18	7.18	1	0	1	1	1	0	4	7	0	1	0	0	0	0	0	1	0
1	1	0	0	0	0	29.01	0	79	130	80	1.38	1.19	7.59	0	0	0	1	1	0	3	7	0	1	0	0	0	0	0	1	0
1	1	0	0	0	0	30	0	81	130	80	1.91	0.52	7.21	0	0	0	1	1	0	3	7	0	1	0	0	0	0	0	1	0
1	1	0	0	0	0	31.03	0	67	130	80	1.5	0.9	6.25	0	0	0	1	1	0	3	7	0	1	0	0	0	0	0	1	0
1	1	0	0	0	0	44.05	0	78	130	78	1.29	1.37	6.11	0	0	0	1	1	0	3	7	0	1	0	0	0	0	0	1	0
1	1	0	0	0	0	47.05	0	87	130	70	1.09	0.81	6.31	0	0	0	1	1	0	3	7	0	1	0	0	0	0	0	1	0
1	1	0	0	0	0	53	0	72	136	80	2.57	1.3	6.59	0	0	0	1	1	0	3	7	0	1	0	0	0	0	0	1	0
1	1	0	0	0	0	51	0	82	131	89	1.14	0.98	6.5	0	0	0	1	1	0	3	7	0	1	0	0	0	0	0	1	0
2	1	0	0	0	0	39	0	78	119	86	0.87	0.49	4.43	0	0	1	0	1	0	3	7	0	1	0	0	0	0	0	1	0
2	1	0	0	0	0	43	0	70	130	80	0.7	0.37	4.04	0	0	1	0	1	0	3	7	0	1	0	0	0	0	0	1	0
2	1	0	0	0	0	48.09	0	76	147	108	0.91	1.4	4.06	0	0	1	0	1	0	3	7	0	1	0	0	0	0	0	1	0
2	1	0	0	0	0	51.01	0	63	120	90	1.58	0.49	4.92	0	0	0	0	1	0	2	7	0	1	0	0	0	0	0	1	0
2	1	0	0	0	0	50.04	0	78	130	80	1.48	0.8	4.68	0	0	0	0	1	0	2	7	0	1	0	0	0	0	0	1	0
2	1	0	0	0	0	33.11	0	68	136	92	1.55	0.81	4.03	0	0	0	0	1	0	2	7	0	1	0	0	0	0	0	1	0
2	1	0	0	0	0	55.09	0	66	161	89	1.46	0.66	5.91	0	0	0	1	1	0	3	7	0	1	0	0	0	0	0	1	0
1	1	0	0	0	0	50.03	0	97	120	90	0.93	0.88	4.47	1	0	1	0	1	1	4	4	0	1	0	0	1	0	1	0	0
1	1	0	0	0	0	35.11	0	90	131	80	0.9	0.99	4.82	1	0	1	0	1	1	4	4	0	1	0	0	1	0	1	0	0
1	1	0	0	0	0	32.1	0	99	120	90	0.6	1.09	4.56	1	0	1	0	1	1	4	4	0	1	0	0	1	0	1	0	0
1	1	0	0	0	0	48	0	94	140	90	0.88	1.3	2.82	1	0	1	0	1	1	4	4	0	1	0	0	1	0	1	0	0
1	1	0	0	0	0	37	0	90	138	90	0.96	1.17	5.47	1	0	1	0	1	1	4	4	0	1	0	0	1	0	1	0	0
1	1	0	0	0	0	60.03	0	93	140	80	1.37	1.26	5.05	0	0	0	0	1	1	3	3	0	1	0	0	1	0	1	0	0
1	1	0	0	0	0	42.06	0	92	130	84	1.64	1.44	4.36	0	0	0	0	1	1	3	3	0	1	0	0	1	0	1	0	0
1	1	0	0	0	0	64.03	0	90	160	90	2.03	1.61	5.03	0	0	0	0	1	1	3	3	0	1	0	0	1	0	1	0	0
1	1	0	0	0	0	77.09	0	95	150	90	1.26	0.6	3.93	0	0	0	0	1	1	3	3	0	1	0	0	1	0	1	0	0
1	1	0	0	0	0	43.05	0	90	130	80	1.22	1.05	5.08	0	0	0	0	1	1	3	3	0	1	0	0	1	0	1	0	0
1	1	0	0	0	0	47	0	91	130	70	1.21	1.42	5.13	0	0	0	0	1	1	3	3	0	1	0	0	1	0	1	0	0
1	1	0	0	0	0	59.02	0	108	140	100	1	1.1	7.33	1	0	1	1	1	1	5	5	0	1	0	0	1	0	1	0	0
1	1	0	0	0	0	46	0	91	120	90	0.58	1.45	5.85	1	0	1	1	1	1	5	5	0	1	0	0	1	0	1	0	0
2	1	0	0	0	0	41	0	81	130	84	0.75	0.44	4.39	1	0	1	0	1	1	4	4	0	1	0	0	1	0	1	0	0
2	1	0	0	0	0	33	0	85	124	88	1.23	0.49	4.62	1	0	1	0	1	1	4	4	0	1	0	0	1	0	1	0	0
2	1	0	0	0	0	56	0	97	160	120	1.24	0.7	5.59	1	0	1	0	1	1	4	4	0	1	0	0	1	0	1	0	0
1	1	0	0	0	1	40.11	0	90	130	90	0.89	1.38	5.02	1	0	1	0	1	1	4	4	0	1	0	0	1	0	1	0	0
2	1	0	0	0	0	52.09	0	84	146	78	1.42	0.82	4.77	0	0	0	0	1	1	3	3	0	1	0	0	1	0	1	0	0
2	1	0	0	0	0	49.1	0	88	130	80	0.89	1.09	6.54	1	0	1	1	1	1	5	5	0	1	0	0	1	0	1	0	0
2	1	0	0	0	0	42	0	95	132	90	2.34	0.49	4.62	1	0	0	1	1	1	4	4	0	1	0	0	1	0	1	0	0
2	1	0	0	0	0	48.11	0	94	130	90	1.33	0.85	6.09	1	0	0	1	1	1	4	4	0	1	0	0	1	0	1	0	0
2	1	0	0	0	1	55.09	0	80	139	89	1.51	0.83	5.84	1	0	0	1	1	1	4	4	0	1	0	0	1	0	1	0	0
1	1	1	0	0	0	49.11	0	75	127.5	90	0.96	1.71	4.05	1	1	1	0	1	0	4	7	0	1	0	0	0	0	0	1	0
1	1	1	0	0	0	35.1	0	89.1	132	98	1.26	1.88	7	1	1	0	1	1	0	4	7	0	1	0	0	0	0	0	1	0
1	1	1	0	0	1	38.08	0	78	136	88	1.22	2.4	4.34	0	1	0	0	1	0	3	7	0	1	0	0	0	0	0	1	0
1	1	1	0	0	1	40.1	0	88	161	91	0.78	10.28	6.2	1	1	1	1	1	0	5	7	1	0	0	0	0	1	0	1	0
1	1	1	0	0	0	35.07	0	98	130	76	0.83	2.53	5.3	1	1	1	0	1	1	5	5	0	1	0	0	1	0	1	0	0
1	1	1	0	0	0	54.03	0	90	144	90	1.42	2.45	5.02	1	1	0	0	1	1	4	4	0	1	0	0	1	0	1	0	0
1	1	1	0	0	0	32.01	0	83	130	83	1.7	0.97	5.35	0	0	0	0	1	0	2	7	0	1	0	0	0	0	0	1	0
1	1	1	0	0	0	31	0	70	131	81	1.35	1.25	5.3	0	0	0	0	1	0	2	7	0	1	0	0	0	0	0	1	0
1	1	1	0	0	0	30.04	0	83	130	83	1.33	1.59	4.36	0	0	0	0	1	0	2	7	0	1	0	0	0	0	0	1	0
1	1	1	0	0	0	28.06	0	80	119	87	1.37	0.8	5	0	0	0	0	1	0	2	7	0	1	0	0	0	0	0	1	0
1	1	1	0	0	0	44.06	0	89	130	78	1.29	0.77	4.71	0	0	0	0	1	0	2	7	0	1	0	0	0	0	0	1	0
1	1	1	0	0	0	50.09	0	88	152	108	1.63	0.69	4.96	0	0	0	0	1	0	2	7	0	1	0	0	0	0	0	1	0
1	1	1	0	0	0	58.1	0	83	139	99	1.48	0.58	5.2	0	0	0	0	1	0	2	7	0	1	0	0	0	0	0	1	0
1	1	1	0	0	0	49.04	0	74	147	100	1.48	0.39	4.96	0	0	0	0	1	0	2	7	0	1	0	0	0	0	0	1	0
1	1	1	0	0	0	45.07	0	85	137	109	1.37	1.18	3.78	0	0	0	0	1	0	2	7	0	1	0	0	0	0	0	1	0
1	1	1	0	0	0	73.01	0	88	181	104	1.65	0.59	4.66	0	0	0	0	1	0	2	7	0	1	0	0	0	0	0	1	0
1	1	1	0	0	0	76.02	0	89	219	117	1.91	0.66	4.8	0	0	0	0	1	0	2	7	0	1	0	0	0	0	0	1	0
1	1	1	0	0	0	46.09	0	86	210	148	2.72	1.21	5.8	0	0	0	1	1	0	3	7	0	1	0	0	0	0	0	1	0
1	1	1	0	0	0	61.05	0	95	145	96	1.57	0.93	4.82	0	0	0	0	1	1	3	3	0	1	0	0	1	0	1	0	0
1	1	1	0	0	0	57.05	0	94	120	86	1.61	1.4	5.23	0	0	0	0	1	1	3	3	0	1	0	0	1	0	1	0	0
1	1	1	0	0	0	65.04	0	90	175	110	0.97	0.83	6	1	0	1	1	1	1	5	5	0	1	0	0	1	0	1	0	0
1	1	1	0	0	0	50.03	0	96	136	90	1.91	1.14	7.37	1	0	0	1	1	1	4	4	0	1	0	0	1	0	1	0	0
1	1	1	0	0	0	54.01	0	108	159	106	1.34	1.03	8.3	1	0	0	1	1	1	4	4	0	1	0	0	1	0	1	0	0
1	1	1	0	0	0	61.09	0	90	131	81	2.3	0.63	6.29	1	0	0	1	1	1	4	4	0	1	0	0	1	0	1	0	0
1	1	1	0	0	0	63	0	91.8	143	87	1.5	0.77	6.53	1	0	0	1	1	1	4	4	0	1	0	0	1	0	1	0	0
1	1	1	0	0	0	64.06	0	110	158	110	1.68	0.62	6.3	1	0	0	1	1	1	4	4	0	1	0	0	1	0	1	0	0
1	1	1	0	0	0	39	0	90.5	136	70	1.05	1.47	5.95	1	0	0	1	1	1	4	4	0	1	0	0	1	0	1	0	0
1	1	1	0	0	1	30.05	0	107	143	91	1.04	1.28	5.5	0	0	0	0	1	1	3	3	0	1	0	0	1	0	1	0	0
1	1	1	0	0	1	42.09	0	96.1	139	98	1.68	1.68	5.6	1	0	0	1	1	1	4	4	0	1	0	0	1	0	1	0	0
1	1	1	0	0	0	39.01	0	86	130	83	0.91	7.9	4.65	1	1	1	0	1	0	4	7	0	1	0	0	0	0	0	1	0
1	1	1	0	0	0	51.1	0	80	115	87	1.65	2.22	5.17	0	1	0	0	1	0	3	7	0	1	0	0	0	0	0	1	0
1	1	1	0	0	0	40.09	0	83	170	110	1.28	1.83	4.85	0	1	0	0	1	0	3	7	0	1	0	0	0	0	0	1	0
1	1	1	0	0	0	42	0	84	180	110	1.47	5	4.77	0	1	0	0	1	0	3	7	0	1	0	0	0	0	0	1	0
1	1	1	0	0	0	49.07	0	100	110	90	1.25	3.7	5.2	1	1	0	0	1	1	4	4	0	1	0	0	1	0	1	0	0
1	1	1	0	0	0	69.09	0	90	140	90	1.31	0.8	6	1	1	1	1	1	1	6	6	1	0	0	1	0	0	1	0	0
1	1	1	0	0	0	40	0	75	130	83	0.25	0.03	2.55	0	0	1	0	1	0	3	7	0	1	0	0	0	0	0	1	0
1	1	1	0	0	0	31.09	0	88	148	100	1.03	1.4	3.85	0	0	1	0	1	0	3	7	0	1	0	0	0	0	0	1	0
1	1	1	0	0	0	61.02	0	75	150	98	2.03	0.51	4.32	0	0	0	0	1	0	2	7	0	1	0	0	0	0	0	1	0
1	1	1	0	0	0	66.03	0	80	132	84	1.1	0.78	4.42	0	0	0	0	1	0	2	7	0	1	0	0	0	0	0	1	0
1	1	1	0	0	0	57	0	75	160	100	1.17	0.94	4.96	0	0	0	0	1	0	2	7	0	1	0	0	0	0	0	1	0
1	1	1	0	0	0	51.09	0	87	135	95	0.97	0.98	15.16	1	0	1	1	1	0	4	7	0	1	0	0	0	0	0	1	0
1	1	1	0	0	0	47.01	0	88	152	100	0.99	0.92	8.15	1	0	1	1	1	0	4	7	0	1	0	0	0	0	0	1	0
1	1	1	0	0	0	46.11	0	80	124	98	1.15	0.9	5.68	0	0	0	1	1	0	3	7	0	1	0	0	0	0	0	1	0
1	1	1	0	0	0	37.06	0	81	180	100	1.4	1.62	5.77	0	0	0	1	1	0	3	7	0	1	0	0	0	0	0	1	0
1	1	1	0	0	0	63.09	0	76	156	100	1.11	1.06	6.57	0	0	0	1	1	0	3	7	0	1	0	0	0	0	0	1	0
1	1	1	0	0	0	46	0	84	132	90	1.08	0.89	6.15	0	0	0	1	1	0	3	7	0	1	0	0	0	0	0	1	0
1	1	1	0	0	1	32.09	0	83	130	83	1.15	1	4.44	0	0	0	0	1	0	2	7	0	1	0	0	0	0	0	1	0
1	1	1	0	0	1	25.11	0	83	130	83	1.38	1.42	5.65	0	0	0	1	1	0	3	7	0	1	0	0	0	0	0	1	0
1	1	1	0	0	0	48	0	100	138	99	1.03	0.86	4.98	1	0	1	0	1	1	4	4	0	1	0	0	1	0	1	0	0
1	0	0	0	0	0	38.03	0	88	136	88	1.15	2.63	5.07	0	1	0	0	1	0	3	7	0	1	0	0	0	0	0	1	0
2	0	0	0	0	0	35.08	0	78	131	87	1.38	1.74	5.02	0	1	0	0	1	0	3	7	0	1	0	0	0	0	0	1	0
1	0	0	0	0	0	43.04	0	90.2	126	87	1.47	2.66	5.53	1	1	0	0	1	1	4	4	0	1	0	0	1	0	1	0	0
2	0	0	0	0	1	61.06	0	75	167	89	1.41	1.16	5.4	1	1	1	0	1	0	4	7	0	1	0	0	0	0	0	1	0
1	0	0	0	0	0	48.04	0	113	150	104	0.77	3.75	6.66	1	1	1	1	1	1	6	6	1	0	0	1	0	0	1	0	0
2	0	0	0	0	0	70.02	0	87	129	90	1.82	0.78	5.4	1	1	1	0	1	1	5	5	0	1	0	0	1	0	1	0	0
2	0	0	0	0	0	50.1	0	92	150	95	1.9	0.81	3.9	1	1	1	0	1	1	5	5	0	1	0	0	1	0	1	0	0
2	0	0	0	0	0	72.11	0	92	160	106	1.39	0.87	4.82	1	1	1	0	1	1	5	5	0	1	0	0	1	0	1	0	0
2	0	0	0	0	0	47.06	0	87	140	90	0.98	0.59	3.48	1	1	1	0	1	1	5	5	0	1	0	0	1	0	1	0	0
2	0	0	0	0	0	41.11	0	100.6	142	103	1.26	1.26	5.54	1	1	1	0	1	1	5	5	0	1	0	0	1	0	1	0	0
2	0	0	0	0	0	61.05	0	85	130	90	1.09	1.72	5.37	1	1	1	0	1	1	5	5	0	1	0	0	1	0	1	0	0
2	0	0	0	0	0	59.11	0	86	126	94	1.4	2.2	6.7	1	1	0	1	1	1	5	5	0	1	0	0	1	0	1	0	0
2	0	0	0	0	1	58.06	0	87.4	130	73	1.33	0.88	6.74	1	1	1	1	1	1	6	6	1	0	0	1	0	0	1	0	0
1	0	0	0	0	0	30.11	0	70	135	89	1.01	0.33	4.74	0	0	1	0	1	0	3	7	0	1	0	0	0	0	0	1	0
1	0	0	0	0	0	29.05	0	75.9	130	75	2.04	1.43	4.14	0	0	0	0	1	0	2	7	0	1	0	0	0	0	0	1	0
1	0	0	0	0	0	28.08	0	82	139	80	1.98	0.82	4.41	0	0	0	0	1	0	2	7	0	1	0	0	0	0	0	1	0
1	0	0	0	0	0	35.05	0	78	149	61	1.69	0.97	5.3	0	0	0	0	1	0	2	7	0	1	0	0	0	0	0	1	0
1	0	0	0	0	0	40	0	78	137	78	1.88	0.47	4.21	0	0	0	0	1	0	2	7	0	1	0	0	0	0	0	1	0
1	0	0	0	0	0	58.07	0	73.5	141	77	1.96	0.74	3.69	0	0	0	0	1	0	2	7	0	1	0	0	0	0	0	1	0
1	0	0	0	0	0	28.06	0	75	112	90	1.4	0.9	5.5	0	0	0	0	1	0	2	7	0	1	0	0	0	0	0	1	0
1	0	0	0	0	0	32.11	0	72	130	80	1.35	0.83	4.78	0	0	0	0	1	0	2	7	0	1	0	0	0	0	0	1	0
1	0	0	0	0	0	58.04	0	84	132	79	1.44	0.87	4.41	0	0	0	0	1	0	2	7	0	1	0	0	0	0	0	1	0
1	0	0	0	0	0	28.07	0	78	126	86	1.32	0.84	5.27	0	0	0	0	1	0	2	7	0	1	0	0	0	0	0	1	0
1	0	0	0	0	0	26.09	0	81	141	82	1.26	0.79	5.3	0	0	0	0	1	0	2	7	0	1	0	0	0	0	0	1	0
1	0	0	0	0	0	31.08	0	77.5	131	98	1.46	0.87	4.7	0	0	0	0	1	0	2	7	0	1	0	0	0	0	0	1	0
1	0	0	0	0	0	39.03	0	75	120	89	1.18	0.74	3.23	0	0	0	0	1	0	2	7	0	1	0	0	0	0	0	1	0
1	0	0	0	0	0	47.08	0	80	146	86	1.54	0.69	4.4	0	0	0	0	1	0	2	7	0	1	0	0	0	0	0	1	0
1	0	0	0	0	0	53.02	0	83.5	164	86	1.66	0.7	3.42	0	0	0	0	1	0	2	7	0	1	0	0	0	0	0	1	0
1	0	0	0	0	0	24.07	0	76	145	89	1.13	1.06	3.79	0	0	0	0	1	0	2	7	0	1	0	0	0	0	0	1	0
1	0	0	0	0	0	31.09	0	78	144	89	1.1	1.51	4.35	0	0	0	0	1	0	2	7	0	1	0	0	0	0	0	1	0
1	0	0	0	0	0	33.06	0	82	144	90	1.16	0.89	4.64	0	0	0	0	1	0	2	7	0	1	0	0	0	0	0	1	0
1	0	0	0	0	0	40.08	0	84	146	100	1.53	1.56	5.33	0	0	0	0	1	0	2	7	0	1	0	0	0	0	0	1	0
1	0	0	0	0	0	62.05	0	83	169.5	105	1.99	0.62	4.8	0	0	0	0	1	0	2	7	0	1	0	0	0	0	0	1	0
1	0	0	0	0	0	33.03	0	85	164	122.5	1.29	0.66	4.9	0	0	0	0	1	0	2	7	0	1	0	0	0	0	0	1	0
1	0	0	0	0	0	24.04	0	70	131	70	0.85	1.28	6.14	1	0	1	1	1	0	4	7	0	1	0	0	0	0	0	1	0
1	0	0	0	0	0	20.05	0	74	136	64	1.06	0.54	7.61	0	0	0	1	1	0	3	7	0	1	0	0	0	0	0	1	0
1	0	0	0	0	0	36.04	0	86.3	129	86	1.29	1.15	8.89	0	0	0	1	1	0	3	7	0	1	0	0	0	0	0	1	0
1	0	0	0	0	0	27.07	0	74	128	86	1.83	0.51	6.8	0	0	0	1	1	0	3	7	0	1	0	0	0	0	0	1	0
1	0	0	0	0	0	48.05	0	77	131	84	2.88	0.78	5.6	0	0	0	1	1	0	3	7	0	1	0	0	0	0	0	1	0
1	0	0	0	0	0	61	0	84	128	88	1.88	0.67	6	0	0	0	1	1	0	3	7	0	1	0	0	0	0	0	1	0
1	0	0	0	0	0	31.05	0	86	136	80	1.34	0.74	5.67	0	0	0	1	1	0	3	7	0	1	0	0	0	0	0	1	0
1	0	0	0	0	0	34.11	0	87	138	91	1.76	0.76	5.7	0	0	0	1	1	0	3	7	0	1	0	0	0	0	0	1	0
1	0	0	0	0	0	39.1	0	83	139	80	1.4	0.52	6	0	0	0	1	1	0	3	7	0	1	0	0	0	0	0	1	0
1	0	0	0	0	0	23.08	0	82	151	101	2.81	1.56	6	0	0	0	1	1	0	3	7	0	1	0	0	0	0	0	1	0
1	0	0	0	0	0	61.08	0	88.9	140	85	1.35	0.64	6.53	0	0	0	1	1	0	3	7	0	1	0	0	0	0	0	1	0
1	0	0	0	0	0	61.1	0	85	150	88	1.51	0.85	6.35	0	0	0	1	1	0	3	7	0	1	0	0	0	0	0	1	0
2	0	0	0	0	0	24.07	0	75	130	72	1.27	1.14	5.5	0	0	1	0	1	0	3	7	0	1	0	0	0	0	0	1	0
2	0	0	0	0	0	40.09	0	79	119	88	1.14	0.41	5.1	0	0	1	0	1	0	3	7	0	1	0	0	0	0	0	1	0
2	0	0	0	0	0	31.11	0	64	130	83	1.1	0.46	4.43	0	0	1	0	1	0	3	7	0	1	0	0	0	0	0	1	0
2	0	0	0	0	0	24.06	0	72	146	78	1.26	1.11	5.2	0	0	1	0	1	0	3	7	0	1	0	0	0	0	0	1	0
2	0	0	0	0	0	26.07	0	66	131	88	0.99	0.92	4.1	0	0	1	0	1	0	3	7	0	1	0	0	0	0	0	1	0
2	0	0	0	0	0	38.09	0	79	144	85	1.22	1.04	4.18	0	0	1	0	1	0	3	7	0	1	0	0	0	0	0	1	0
2	0	0	0	0	0	45.03	0	78	138	90	1.29	0.38	4.49	0	0	1	0	1	0	3	7	0	1	0	0	0	0	0	1	0
2	0	0	0	0	0	58.07	0	72	142	80	0.98	0.69	5.34	0	0	1	0	1	0	3	7	0	1	0	0	0	0	0	1	0
2	0	0	0	0	0	35.11	0	79	130	83	1.14	1.19	3.93	0	0	1	0	1	0	3	7	0	1	0	0	0	0	0	1	0
1	0	0	0	0	1	32.05	0	75	130	84	0.98	1.4	3.22	0	0	1	0	1	0	3	7	0	1	0	0	0	0	0	1	0
1	0	0	0	0	1	34.05	0	74	138	88	0.99	0.7	3.68	0	0	1	0	1	0	3	7	0	1	0	0	0	0	0	1	0
2	0	0	0	0	0	43	0	76	140	100	1.44	0.64	4.36	0	0	0	0	1	0	2	7	0	1	0	0	0	0	0	1	0
2	0	0	0	0	0	28.09	0	63	120	85	1.41	1.16	5.4	0	0	0	0	1	0	2	7	0	1	0	0	0	0	0	1	0
2	0	0	0	0	0	23.01	0	73.4	142	69	1.57	0.9	4.96	0	0	0	0	1	0	2	7	0	1	0	0	0	0	0	1	0
2	0	0	0	0	0	39.04	0	60	113	97	1.69	0.42	5.3	0	0	0	0	1	0	2	7	0	1	0	0	0	0	0	1	0
2	0	0	0	0	0	35.11	0	70	110	85	1.5	0.78	4.75	0	0	0	0	1	0	2	7	0	1	0	0	0	0	0	1	0
2	0	0	0	0	0	37.07	0	75	124	86	1.55	0.98	4.75	0	0	0	0	1	0	2	7	0	1	0	0	0	0	0	1	0
2	0	0	0	0	0	42	0	76	130	70	1.33	0.9	4.48	0	0	0	0	1	0	2	7	0	1	0	0	0	0	0	1	0
2	0	0	0	0	0	45.07	0	74	131	81	2.73	0.41	4.67	0	0	0	0	1	0	2	7	0	1	0	0	0	0	0	1	0
2	0	0	0	0	0	73.05	0	75	150	79	1.68	0.94	5.4	0	0	0	0	1	0	2	7	0	1	0	0	0	0	0	1	0
2	0	0	0	0	0	28.06	0	75	121	90	1.46	0.42	5.2	0	0	0	0	1	0	2	7	0	1	0	0	0	0	0	1	0
2	0	0	0	0	0	33	0	79	138	81	1.55	0.36	5.2	0	0	0	0	1	0	2	7	0	1	0	0	0	0	0	1	0
2	0	0	0	0	0	37.09	0	69	134	80	1.39	0.42	5.02	0	0	0	0	1	0	2	7	0	1	0	0	0	0	0	1	0
2	0	0	0	0	0	29.08	0	76	130	86	1.34	0.93	4.63	0	0	0	0	1	0	2	7	0	1	0	0	0	0	0	1	0
2	0	0	0	0	0	31.06	0	78	131	88	1.34	0.63	5.2	0	0	0	0	1	0	2	7	0	1	0	0	0	0	0	1	0
2	0	0	0	0	0	24.03	0	72	134	90	1.98	0.49	4.4	0	0	0	0	1	0	2	7	0	1	0	0	0	0	0	1	0
2	0	0	0	0	0	42.04	0	73	136	88	1.47	0.53	4.43	0	0	0	0	1	0	2	7	0	1	0	0	0	0	0	1	0
2	0	0	0	0	0	44.09	0	68	139	95	2.37	1.02	5.57	0	0	0	0	1	0	2	7	0	1	0	0	0	0	0	1	0
2	0	0	0	0	0	25	0	70	130	90	1.32	0.38	5.19	0	0	0	0	1	0	2	7	0	1	0	0	0	0	0	1	0
2	0	0	0	0	0	63.11	0	76	145	95	1.73	1.54	4.7	0	0	0	0	1	0	2	7	0	1	0	0	0	0	0	1	0
2	0	0	0	0	0	38.1	0	70	139.5	107	1.45	1.32	4.99	0	0	0	0	1	0	2	7	0	1	0	0	0	0	0	1	0
1	0	0	0	0	1	35	0	79	125	92	1.95	0.68	4.88	0	0	0	0	1	0	2	7	0	1	0	0	0	0	0	1	0
1	0	0	0	0	1	45.06	0	68	135	85	1.42	0.93	4.37	0	0	0	0	1	0	2	7	0	1	0	0	0	0	0	1	0
1	0	0	0	0	1	42.06	0	85	161	99	1.32	1.08	5.1	0	0	0	0	1	0	2	7	0	1	0	0	0	0	0	1	0
2	0	0	0	0	0	25.08	0	75	130	75	1.87	0.79	6.2	0	0	0	1	1	0	3	7	0	1	0	0	0	0	0	1	0
2	0	0	0	0	0	35.02	0	62	120	86	2.03	0.66	5.82	0	0	0	1	1	0	3	7	0	1	0	0	0	0	0	1	0
2	0	0	0	0	0	25.08	0	65	130	83	2.28	0.94	5.69	0	0	0	1	1	0	3	7	0	1	0	0	0	0	0	1	0
2	0	0	0	0	0	41.02	0	68	130	83	1.66	0.66	6.03	0	0	0	1	1	0	3	7	0	1	0	0	0	0	0	1	0
2	0	0	0	0	0	61.06	0	66	145	75	2	0.62	6	0	0	0	1	1	0	3	7	0	1	0	0	0	0	0	1	0
1	0	0	0	0	1	40.08	0	75	134	90	1.34	0.14	5.75	0	0	0	1	1	0	3	7	0	1	0	0	0	0	0	1	0
1	0	0	0	0	0	74.05	0	91	130	90	2.1	0.65	3.26	0	0	0	0	1	1	3	3	0	1	0	0	1	0	1	0	0
1	0	0	0	0	0	45.08	0	92	126	90	1.31	0.87	5.57	0	0	0	0	1	1	3	3	0	1	0	0	1	0	1	0	0
1	0	0	0	0	0	66.09	0	104	156	104	1.25	1.34	4.9	0	0	0	0	1	1	3	3	0	1	0	0	1	0	1	0	0
1	0	0	0	0	0	57.06	0	93	160	119	1.44	1.36	5.4	1	0	0	1	1	1	4	4	0	1	0	0	1	0	1	0	0
1	0	0	0	0	0	74.08	0	100	150	86	1.81	0.66	9.12	1	0	0	1	1	1	4	4	0	1	0	0	1	0	1	0	0
1	0	0	0	0	0	53.11	0	90	159	100	1.81	0.64	5.7	1	0	0	1	1	1	4	4	0	1	0	0	1	0	1	0	0
1	0	0	0	0	0	40.02	0	120	150	90	1.14	1.25	6.3	1	0	0	1	1	1	4	4	0	1	0	0	1	0	1	0	0
2	0	0	0	0	0	26.08	0	80	136	69	1.09	0.57	5.14	1	0	1	0	1	1	4	4	0	1	0	0	1	0	1	0	0
2	0	0	0	0	0	76.07	0	97	183	93	1.16	0.67	3.41	1	0	1	0	1	1	4	4	0	1	0	0	1	0	1	0	0
2	0	0	0	0	0	32.02	0	85	115	89	1.08	0.66	5.03	1	0	1	0	1	1	4	4	0	1	0	0	1	0	1	0	0
2	0	0	0	0	0	41.08	0	93	123	90	1.25	0.7	5.26	1	0	1	0	1	1	4	4	0	1	0	0	1	0	1	0	0
2	0	0	0	0	0	43.09	0	94	130	84	0.95	1.46	5.04	1	0	1	0	1	1	4	4	0	1	0	0	1	0	1	0	0
2	0	0	0	0	0	25.03	0	88	144	89	1.26	0.94	5.1	1	0	1	0	1	1	4	4	0	1	0	0	1	0	1	0	0
2	0	0	0	0	0	43.08	0	101	127	93	1.18	0.94	4.7	1	0	1	0	1	1	4	4	0	1	0	0	1	0	1	0	0
2	0	0	0	0	0	47.11	0	100	129	88	1	1.01	5.5	1	0	1	0	1	1	4	4	0	1	0	0	1	0	1	0	0
2	0	0	0	0	0	37.07	0	94	125	91	0.99	0.79	4.42	1	0	1	0	1	1	4	4	0	1	0	0	1	0	1	0	0
2	0	0	0	0	0	38.1	0	96	130	79	1.21	1.05	5.2	1	0	1	0	1	1	4	4	0	1	0	0	1	0	1	0	0
2	0	0	0	0	0	38.03	0	100	120	90	0.87	0.55	3.27	1	0	1	0	1	1	4	4	0	1	0	0	1	0	1	0	0
1	0	0	0	0	1	44.08	0	100	134	85	1.02	1.22	4.8	1	0	1	0	1	1	4	4	0	1	0	0	1	0	1	0	0
2	0	0	0	0	0	71.11	0	80	153	79	1.96	0.6	5.3	0	0	0	0	1	1	3	3	0	1	0	0	1	0	1	0	0
2	0	0	0	0	0	49.02	0	83	110	87.5	2.01	1.39	5.5	0	0	0	0	1	1	3	3	0	1	0	0	1	0	1	0	0
2	0	0	0	0	0	31.08	0	81	125	87	1.82	0.88	5.02	0	0	0	0	1	1	3	3	0	1	0	0	1	0	1	0	0
2	0	0	0	0	0	41.06	0	84	121	85	1.45	0.59	5	0	0	0	0	1	1	3	3	0	1	0	0	1	0	1	0	0
2	0	0	0	0	0	50.09	0	82	138	84	1.38	1.42	4.98	0	0	0	0	1	1	3	3	0	1	0	0	1	0	1	0	0
2	0	0	0	0	0	30	0	80	139	79	1.4	0.79	4.8	0	0	0	0	1	1	3	3	0	1	0	0	1	0	1	0	0
2	0	0	0	0	0	52.11	0	83	130	83	1.79	0.7	5.44	0	0	0	0	1	1	3	3	0	1	0	0	1	0	1	0	0
2	0	0	0	0	0	27.06	0	82.3	156	72	1.42	1.06	5.3	0	0	0	0	1	1	3	3	0	1	0	0	1	0	1	0	0
2	0	0	0	0	0	43.04	0	87.2	130	75	2.04	1.04	5.3	0	0	0	0	1	1	3	3	0	1	0	0	1	0	1	0	0
2	0	0	0	0	0	54.05	0	84	137.5	100	1.8	0.98	5.5	0	0	0	0	1	1	3	3	0	1	0	0	1	0	1	0	0
2	0	0	0	0	0	50.1	0	82	135	97.5	1.48	0.83	4.3	0	0	0	0	1	1	3	3	0	1	0	0	1	0	1	0	0
2	0	0	0	0	0	48.03	0	80	136	91	1.33	1	4.85	0	0	0	0	1	1	3	3	0	1	0	0	1	0	1	0	0
2	0	0	0	0	0	77.08	0	90	152	94	1.48	0.52	3.59	0	0	0	0	1	1	3	3	0	1	0	0	1	0	1	0	0
2	0	0	0	0	0	33.11	0	85	111	89	2	0.89	5	0	0	0	0	1	1	3	3	0	1	0	0	1	0	1	0	0
2	0	0	0	0	0	30.07	0	86	130	80	1.8	0.74	5.3	0	0	0	0	1	1	3	3	0	1	0	0	1	0	1	0	0
2	0	0	0	0	0	30.11	0	85	137	83	1.49	1.46	5.1	0	0	0	0	1	1	3	3	0	1	0	0	1	0	1	0	0
2	0	0	0	0	0	46.05	0	90	140	81	1.64	0.74	5	0	0	0	0	1	1	3	3	0	1	0	0	1	0	1	0	0
2	0	0	0	0	0	44.07	0	91	138	94	1.62	0.82	3.51	0	0	0	0	1	1	3	3	0	1	0	0	1	0	1	0	0
2	0	0	0	0	0	49.02	0	125	131	75	1.41	1.04	3.51	0	0	0	0	1	1	3	3	0	1	0	0	1	0	1	0	0
2	0	0	0	0	0	51.11	0	92	167	102	1.98	0.53	5.21	0	0	0	0	1	1	3	3	0	1	0	0	1	0	1	0	0
2	0	0	0	0	0	63.05	0	100.2	191	109	1.38	1.32	4.59	0	0	0	0	1	1	3	3	0	1	0	0	1	0	1	0	0
2	0	0	0	0	0	51.08	0	95	153	97	1.46	1.25	4.93	0	0	0	0	1	1	3	3	0	1	0	0	1	0	1	0	0
2	0	0	0	0	0	40.1	0	99	135	85	1.38	1.14	5.3	0	0	0	0	1	1	3	3	0	1	0	0	1	0	1	0	0
2	0	0	0	0	0	69.1	0	97	158	100	1.13	0.8	5.82	1	0	1	1	1	1	5	5	0	1	0	0	1	0	1	0	0
2	0	0	0	0	0	57.08	0	108	161	89	1.26	1.03	5.6	1	0	1	1	1	1	5	5	0	1	0	0	1	0	1	0	0
2	0	0	0	0	0	37.08	0	84	120	87	1.65	1.05	7.02	1	0	0	1	1	1	4	4	0	1	0	0	1	0	1	0	0
2	0	0	0	0	0	52.11	0	83	147	91	2.14	1.58	6.3	1	0	0	1	1	1	4	4	0	1	0	0	1	0	1	0	0
2	0	0	0	0	0	57.05	0	91.6	148	69	2.56	0.53	6.1	1	0	0	1	1	1	4	4	0	1	0	0	1	0	1	0	0
2	0	0	0	0	0	70	0	84	162.5	90	2.15	0.59	5.8	1	0	0	1	1	1	4	4	0	1	0	0	1	0	1	0	0
2	0	0	0	0	0	42.08	0	82	132.5	90	1.46	1.38	6.4	1	0	0	1	1	1	4	4	0	1	0	0	1	0	1	0	0
2	0	0	0	0	0	45.05	0	82.1	140	91	1.49	0.87	6.81	1	0	0	1	1	1	4	4	0	1	0	0	1	0	1	0	0
2	0	0	0	0	0	41.05	0	90	139.5	90	1.9	1.15	6.2	1	0	0	1	1	1	4	4	0	1	0	0	1	0	1	0	0
2	0	0	0	0	0	46.11	0	108	131	84	1.61	0.57	5.6	1	0	0	1	1	1	4	4	0	1	0	0	1	0	1	0	0
2	0	0	0	0	0	29.07	0	86	135	99	1.38	1.27	5.9	1	0	0	1	1	1	4	4	0	1	0	0	1	0	1	0	0
2	0	0	0	0	0	44.11	0	92	141	91	1.56	1.11	5.63	1	0	0	1	1	1	4	4	0	1	0	0	1	0	1	0	0
2	0	0	0	0	1	52.06	0	90	136	84	1.91	1.17	4.97	0	0	0	0	1	1	3	3	0	1	0	0	1	0	1	0	0
2	0	0	0	0	1	39.1	0	80	138	88	1.43	0.9	3.27	0	0	0	0	1	1	3	3	0	1	0	0	1	0	1	0	0
1	0	0	0	0	0	58	0	73	175	105	0.75	2.55	4.99	1	1	1	0	1	0	4	7	0	1	0	0	0	0	0	1	0
1	0	0	0	0	0	61.08	0	85	150	110	1.96	1.19	4.56	1	1	1	0	1	0	4	7	0	1	0	0	0	0	0	1	0
1	0	0	0	0	0	46	0	84	130	80	1.08	8.9	3.79	0	1	0	0	1	0	3	7	0	1	0	0	0	0	0	1	0
2	0	0	0	0	0	28	0	74	130	80	1.19	2.3	4.38	1	1	1	0	1	0	4	7	0	1	0	0	0	0	0	1	0
2	0	0	0	0	0	25	0	76	120	90	1.25	3.2	5.28	1	1	1	0	1	0	4	7	0	1	0	0	0	0	0	1	0
2	0	0	0	0	0	59.09	0	70	139	89	1.69	0.91	4.89	1	1	1	0	1	0	4	7	0	1	0	0	0	0	0	1	0
2	0	0	0	0	0	45.09	0	74	130	100	1.48	0.75	4.3	1	1	1	0	1	0	4	7	0	1	0	0	0	0	0	1	0
1	0	0	0	0	0	53.07	0	102	130	90	0.97	2.14	5.47	1	1	1	0	1	1	5	5	0	1	0	0	1	0	1	0	0
1	0	0	0	0	0	70	0	99	130	90	0.78	5.3	4.74	1	1	1	0	1	1	5	5	0	1	0	0	1	0	1	0	0
1	0	0	0	0	0	49.02	0	120	120	90	1.02	2.32	4.51	1	1	1	0	1	1	5	5	0	1	0	0	1	0	1	0	0
1	0	0	0	0	0	55	0	110	120	90	0.93	2.6	4.55	1	1	1	0	1	1	5	5	0	1	0	0	1	0	1	0	0
1	0	0	0	0	0	35	0	95	130	88	0.91	3.5	4.76	1	1	1	0	1	1	5	5	0	1	0	0	1	0	1	0	0
1	0	0	0	0	0	51.08	0	112	150	90	0.95	2.35	5.59	1	1	1	0	1	1	5	5	0	1	0	0	1	0	1	0	0
1	0	0	0	0	0	26.03	0	91	135	81	1.93	1.71	5.03	1	1	0	0	1	1	4	4	0	1	0	0	1	0	1	0	0
1	0	0	0	0	0	41.11	0	95	138	79	0.48	4.03	5.79	1	1	1	1	1	1	6	6	1	0	0	1	0	0	1	0	0
1	0	0	0	0	0	73	0	95	140	90	0.64	1.85	5.89	1	1	1	1	1	1	6	6	1	0	0	1	0	0	1	0	0
2	0	0	0	0	0	72.03	0	87	140	90	1.38	0.61	5.38	1	1	1	0	1	1	5	5	0	1	0	0	1	0	1	0	0
2	0	0	0	0	0	50.11	0	90	130	90	1.74	0.61	4.47	1	1	1	0	1	1	5	5	0	1	0	0	1	0	1	0	0
2	0	0	0	0	0	45	0	98	170	120	1.27	2.4	3.58	1	1	1	0	1	1	5	5	0	1	0	0	1	0	1	0	0
2	0	0	0	0	0	50.04	0	86	150	88	1.38	5.6	4.81	1	1	0	0	1	1	4	4	0	1	0	0	1	0	1	0	0
2	0	0	0	0	0	50.02	0	82	160	70	1.6	0.98	7.07	1	1	1	1	1	1	6	6	1	0	0	1	0	0	1	0	0
2	0	0	0	0	0	42	0	104	180	120	1.5	1.28	5.8	1	1	1	1	1	1	6	6	1	0	0	1	0	0	1	0	0
2	0	0	0	0	0	19	0	81	130	78	0.9	3.3	6.47	1	1	1	1	1	1	6	6	1	0	0	1	0	0	1	0	0
2	0	0	0	0	0	34	0	88	130	80	0.79	2.11	5.96	1	1	1	1	1	1	6	6	1	0	0	1	0	0	1	0	0
1	0	0	0	0	0	25.07	0	70	130	80	0.87	0.87	4.52	0	0	1	0	1	0	3	7	0	1	0	0	0	0	0	1	0
1	0	0	0	0	0	24	0	77	134	90	1.02	0.83	5.46	0	0	1	0	1	0	3	7	0	1	0	0	0	0	0	1	0
1	0	0	0	0	0	22.01	0	73	130	83	1.13	1.1	4.9	0	0	0	0	1	0	2	7	0	1	0	0	0	0	0	1	0
1	0	0	0	0	0	25.08	0	76	140	90	1.24	1.17	4.34	0	0	0	0	1	0	2	7	0	1	0	0	0	0	0	1	0
1	0	0	0	0	0	25	0	72	136	81	1.42	0.86	5.03	0	0	0	0	1	0	2	7	0	1	0	0	0	0	0	1	0
1	0	0	0	0	0	51.05	0	75	140	92	1.07	0.78	4.66	0	0	0	0	1	0	2	7	0	1	0	0	0	0	0	1	0
1	0	0	0	0	0	76.04	0	80	135	90	1.15	0.46	5.12	0	0	0	0	1	0	2	7	0	1	0	0	0	0	0	1	0
1	0	0	0	0	0	49.02	0	77	167	115	1.34	0.58	5.07	0	0	0	0	1	0	2	7	0	1	0	0	0	0	0	1	0
1	0	0	0	0	0	73.11	0	67	170	90	1.07	0.67	5.42	0	0	0	0	1	0	2	7	0	1	0	0	0	0	0	1	0
1	0	0	0	0	0	20	0	83	130	80	1.22	0.46	4.9	0	0	0	0	1	0	2	7	0	1	0	0	0	0	0	1	0
1	0	0	0	0	0	24	0	89	137	88	1.08	0.59	3.6	0	0	0	0	1	0	2	7	0	1	0	0	0	0	0	1	0
1	0	0	0	0	0	23.09	0	82	136	82	1.03	0.96	7	1	0	1	1	1	0	4	7	0	1	0	0	0	0	0	1	0
1	0	0	0	0	0	23.08	0	70	135	70	1	0.75	5.72	1	0	1	1	1	0	4	7	0	1	0	0	0	0	0	1	0
1	0	0	0	0	0	50	0	81	144	84	0.8	0.75	6.2	1	0	1	1	1	0	4	7	0	1	0	0	0	0	0	1	0
1	0	0	0	0	0	33.11	0	89	128	85	1.62	0.71	5.64	0	0	0	1	1	0	3	7	0	1	0	0	0	0	0	1	0
1	0	0	0	0	0	73.1	0	70	150	80	1.45	0.59	5.61	0	0	0	1	1	0	3	7	0	1	0	0	0	0	0	1	0
1	0	0	0	0	0	60	0	78	130	80	1.31	0.74	5.89	0	0	0	1	1	0	3	7	0	1	0	0	0	0	0	1	0
1	0	0	0	0	0	32	0	84	130	83	1.14	0.91	5.86	0	0	0	1	1	0	3	7	0	1	0	0	0	0	0	1	0
2	0	0	0	0	0	36	0	71	130	70	1.05	0.71	4.7	0	0	1	0	1	0	3	7	0	1	0	0	0	0	0	1	0
2	0	0	0	0	0	24	0	62	136	80	1.1	0.56	4.79	0	0	1	0	1	0	3	7	0	1	0	0	0	0	0	1	0
2	0	0	0	0	0	22	0	72	132	74	0.74	1.12	3.86	0	0	1	0	1	0	3	7	0	1	0	0	0	0	0	1	0
2	0	0	0	0	0	29.06	0	77	138	60	1.08	0.62	4.91	0	0	1	0	1	0	3	7	0	1	0	0	0	0	0	1	0
2	0	0	0	0	0	22	0	71	130	80	0.94	0.88	4.71	0	0	1	0	1	0	3	7	0	1	0	0	0	0	0	1	0
2	0	0	0	0	0	41.06	0	75	130	83	1.22	0.79	5.41	0	0	1	0	1	0	3	7	0	1	0	0	0	0	0	1	0
2	0	0	0	0	0	25.05	0	74	131	81	0.82	0.78	4.78	0	0	1	0	1	0	3	7	0	1	0	0	0	0	0	1	0
2	0	0	0	0	0	25	0	74	140	98	1.22	0.9	5.5	0	0	1	0	1	0	3	7	0	1	0	0	0	0	0	1	0
2	0	0	0	0	0	43	0	71	140	90	0.89	1.38	5.02	0	0	1	0	1	0	3	7	0	1	0	0	0	0	0	1	0
2	0	0	0	0	0	41	0	74	150	90	0.76	1.65	4.86	0	0	1	0	1	0	3	7	0	1	0	0	0	0	0	1	0
2	0	0	0	0	0	49.03	0	78	150	88	0.97	1.33	4.14	0	0	1	0	1	0	3	7	0	1	0	0	0	0	0	1	0
2	0	0	0	0	0	49.01	0	75	141	98	1.13	0.87	5.41	0	0	1	0	1	0	3	7	0	1	0	0	0	0	0	1	0
2	0	0	0	0	0	55.07	0	75	160	80	0.84	1.08	4.94	0	0	1	0	1	0	3	7	0	1	0	0	0	0	0	1	0
2	0	0	0	0	0	21	0	78	160	71	0.59	0.59	4.27	0	0	1	0	1	0	3	7	0	1	0	0	0	0	0	1	0
2	0	0	0	0	0	35.06	0	78	130	78	1.56	0.59	5.37	0	0	0	0	1	0	2	7	0	1	0	0	0	0	0	1	0
2	0	0	0	0	0	29.09	0	65	130	83	1.68	0.66	4.92	0	0	0	0	1	0	2	7	0	1	0	0	0	0	0	1	0
2	0	0	0	0	0	27.02	0	71	130	70	1.44	0.64	5.06	0	0	0	0	1	0	2	7	0	1	0	0	0	0	0	1	0
2	0	0	0	0	0	57.1	0	78	150	70	1.82	0.61	5.19	0	0	0	0	1	0	2	7	0	1	0	0	0	0	0	1	0
2	0	0	0	0	0	44.06	0	74	140	90	1.93	0.74	4.68	0	0	0	0	1	0	2	7	0	1	0	0	0	0	0	1	0
2	0	0	0	0	0	35.05	0	75	144	90	1.36	0.6	4.48	0	0	0	0	1	0	2	7	0	1	0	0	0	0	0	1	0
2	0	0	0	0	0	33	0	75	120	87	0.84	1.31	7.1	1	0	1	1	1	0	4	7	0	1	0	0	0	0	0	1	0
2	0	0	0	0	0	72	0	78	140	100	0.97	1.41	6.32	1	0	1	1	1	0	4	7	0	1	0	0	0	0	0	1	0
2	0	0	0	0	0	45	0	69	130	86	1.53	0.89	5.77	0	0	0	1	1	0	3	7	0	1	0	0	0	0	0	1	0
2	0	0	0	0	0	35.08	0	78	130	88	1.62	0.57	5.74	0	0	0	1	1	0	3	7	0	1	0	0	0	0	0	1	0
2	0	0	0	0	0	60	0	72	160	100	1.37	0.71	6.49	0	0	0	1	1	0	3	7	0	1	0	0	0	0	0	1	0
1	0	0	0	0	0	56.08	0	90	130	80	0.97	1.31	4.58	1	0	1	0	1	1	4	4	0	1	0	0	1	0	1	0	0
1	0	0	0	0	0	65.04	0	101	160	110	0.97	0.69	5.41	1	0	1	0	1	1	4	4	0	1	0	0	1	0	1	0	0
1	0	0	0	0	0	39.09	0	93	137	80	1.74	1.31	4.55	0	0	0	0	1	1	3	3	0	1	0	0	1	0	1	0	0
1	0	0	0	0	0	54.05	0	91	130	101	1.16	0.93	5.5	0	0	0	0	1	1	3	3	0	1	0	0	1	0	1	0	0
1	0	0	0	0	0	53.82	0	102	130	90	1.09	1.64	4.84	0	0	0	0	1	1	3	3	0	1	0	0	1	0	1	0	0
2	0	0	0	0	1	39	0	76	130	80	1.08	0.81	5.07	0	0	1	0	1	0	3	7	0	1	0	0	0	0	0	1	0
2	0	0	0	0	1	54.07	0	76	120	88	0.92	0.71	4.91	0	0	1	0	1	0	3	7	0	1	0	0	0	0	0	1	0
2	0	0	0	0	1	31	0	74	132	80	1.53	0.89	4.28	0	0	0	0	1	0	2	7	0	1	0	0	0	0	0	1	0
1	0	0	0	0	0	47.02	0	105	138	80	1.03	1.44	13.95	1	0	1	1	1	1	5	5	0	1	0	0	1	0	1	0	0
1	0	0	0	0	0	44	0	99	130	85	0.74	0.5	6.1	1	0	1	1	1	1	5	5	0	1	0	0	1	0	1	0	0
1	0	0	0	0	0	53	0	110	180	100	1.43	0.51	6	1	0	0	1	1	1	4	4	0	1	0	0	1	0	1	0	0
2	0	0	0	0	0	31	0	80	130	83	1.1	0.66	4.48	1	0	1	0	1	1	4	4	0	1	0	0	1	0	1	0	0
2	0	0	0	0	0	30	0	81	130	83	0.95	0.59	5.53	1	0	1	0	1	1	4	4	0	1	0	0	1	0	1	0	0
2	0	0	0	0	0	23	0	88	138	78	1.27	0.29	4.05	1	0	1	0	1	1	4	4	0	1	0	0	1	0	1	0	0
2	0	0	0	0	0	38	0	82	132	81	0.99	0.46	4.38	1	0	1	0	1	1	4	4	0	1	0	0	1	0	1	0	0
2	0	0	0	0	0	67	0	95	140	80	1.29	1.27	4.7	1	0	1	0	1	1	4	4	0	1	0	0	1	0	1	0	0
2	0	0	0	0	0	28.05	0	81	130	83	1.23	0.47	4.22	1	0	1	0	1	1	4	4	0	1	0	0	1	0	1	0	0
2	0	0	0	0	0	50.09	0	90	126	86	1.08	1.64	3.49	1	0	1	0	1	1	4	4	0	1	0	0	1	0	1	0	0
2	0	0	0	0	0	70	0	100	145	90	0.63	0.49	3.51	1	0	1	0	1	1	4	4	0	1	0	0	1	0	1	0	0
2	0	0	0	0	0	24	0	81	130	90	0.96	0.36	5.01	1	0	1	0	1	1	4	4	0	1	0	0	1	0	1	0	0
2	0	0	0	0	0	35	0	89	124	88	1.21	1.4	5.17	1	0	1	0	1	1	4	4	0	1	0	0	1	0	1	0	0
2	0	0	0	0	0	37.09	0	85	132	72	0.88	0.6	4.42	1	0	1	0	1	1	4	4	0	1	0	0	1	0	1	0	0
2	0	0	0	0	0	51	0	107	142	90	1.12	0.99	5.13	1	0	1	0	1	1	4	4	0	1	0	0	1	0	1	0	0
2	0	0	0	0	0	62.09	0	96	150	100	1.19	0.97	4.18	1	0	1	0	1	1	4	4	0	1	0	0	1	0	1	0	0
2	0	0	0	0	0	28	0	87	148	88	0.91	1.6	4.28	1	0	1	0	1	1	4	4	0	1	0	0	1	0	1	0	0
2	0	0	0	0	0	45.09	0	90	129	92	1.03	0.37	4.06	1	0	1	0	1	1	4	4	0	1	0	0	1	0	1	0	0
2	0	0	0	0	0	45.08	0	102	119	86	1	1.53	5.19	1	0	1	0	1	1	4	4	0	1	0	0	1	0	1	0	0
2	0	0	0	0	0	35	0	98	120	90	1.13	0.64	4.83	1	0	1	0	1	1	4	4	0	1	0	0	1	0	1	0	0
2	0	0	0	0	0	26	0	82	130	80	1.33	0.57	4.26	0	0	0	0	1	1	3	3	0	1	0	0	1	0	1	0	0
2	0	0	0	0	0	43.11	0	81	130	80	1.46	0.52	4.44	0	0	0	0	1	1	3	3	0	1	0	0	1	0	1	0	0
2	0	0	0	0	0	55.1	0	85	130	81	1.9	0.77	5.35	0	0	0	0	1	1	3	3	0	1	0	0	1	0	1	0	0
2	0	0	0	0	0	35.09	0	80	138	80	1.52	0.64	4.85	0	0	0	0	1	1	3	3	0	1	0	0	1	0	1	0	0
2	0	0	0	0	0	51.02	0	90	131	82	1.74	0.84	3.32	0	0	0	0	1	1	3	3	0	1	0	0	1	0	1	0	0
2	0	0	0	0	0	78	0	87	180	100	1.31	1.64	4.93	0	0	0	0	1	1	3	3	0	1	0	0	1	0	1	0	0
2	0	0	0	0	0	84	0	107	160	100	1.39	0.81	4.49	0	0	0	0	1	1	3	3	0	1	0	0	1	0	1	0	0
2	0	0	0	0	0	35	0	82	144	100	1.46	0.65	5.09	0	0	0	0	1	1	3	3	0	1	0	0	1	0	1	0	0
2	0	0	0	0	0	40.09	0	90	127	87	1.32	1.3	4.91	0	0	0	0	1	1	3	3	0	1	0	0	1	0	1	0	0
2	0	0	0	0	0	39.02	0	95	120	86	1.71	1.07	3.74	0	0	0	0	1	1	3	3	0	1	0	0	1	0	1	0	0
2	0	0	0	0	0	24.04	0	91	130	91	1.42	1.05	4.23	0	0	0	0	1	1	3	3	0	1	0	0	1	0	1	0	0
1	0	0	0	0	1	27	0	92	138	87	1.55	0.64	5.33	0	0	0	0	1	1	3	3	0	1	0	0	1	0	1	0	0
2	0	0	0	0	0	49	0	90	158	100	1.21	1.12	7.26	1	0	1	1	1	1	5	5	0	1	0	0	1	0	1	0	0
2	0	0	0	0	0	52	0	83	140	90	1.06	0.81	5.66	1	0	1	1	1	1	5	5	0	1	0	0	1	0	1	0	0
2	0	0	0	0	0	57.08	0	92	200	80	1.16	1.21	5.74	1	0	1	1	1	1	5	5	0	1	0	0	1	0	1	0	0
2	0	0	0	0	0	66	0	100	140	100	0.8	0.85	6.69	1	0	1	1	1	1	5	5	0	1	0	0	1	0	1	0	0
2	0	0	0	0	0	44	0	92	170	119	1.12	1.28	5.68	1	0	1	1	1	1	5	5	0	1	0	0	1	0	1	0	0
2	0	0	0	0	0	49.09	0	118	160	100	1.25	0.97	5.63	1	0	1	1	1	1	5	5	0	1	0	0	1	0	1	0	0
2	0	0	0	0	0	62	0	101	180	120	1.31	1.09	7.33	1	0	0	1	1	1	4	4	0	1	0	0	1	0	1	0	0
2	0	0	0	0	0	48.1	0	91	140	80	2.05	1.33	7.44	1	0	0	1	1	1	4	4	0	1	0	0	1	0	1	0	0
2	0	0	0	0	0	59.1	0	91	120	90	1.56	1.15	6.03	1	0	0	1	1	1	4	4	0	1	0	0	1	0	1	0	0
2	0	0	0	0	0	60.1	0	103	131	100	1.64	0.77	6.2	1	0	0	1	1	1	4	4	0	1	0	0	1	0	1	0	0
2	0	0	0	0	0	56.02	0	97	130	80	1.46	1.43	6.41	1	0	0	1	1	1	4	4	0	1	0	0	1	0	1	0	0
2	0	0	0	0	0	38.04	0	91	122	88	1.46	0.89	6.23	1	0	0	1	1	1	4	4	0	1	0	0	1	0	1	0	0
2	0	0	0	0	0	38.1	0	90	130	80	1.36	0.9	6.81	1	0	0	1	1	1	4	4	0	1	0	0	1	0	1	0	0
1	0	1	0	0	0	64.02	0	91	140	79	1.66	0.75	5.2	1	1	1	0	1	1	5	5	0	1	0	0	1	0	1	0	0
1	0	1	0	0	0	32.04	0	92	157	111	1.58	2.4	4.6	1	1	0	0	1	1	4	4	0	1	0	0	1	0	1	0	0
1	0	1	0	0	0	33.11	0	105	130	100	1.32	2.71	5.3	1	1	0	0	1	1	4	4	0	1	0	0	1	0	1	0	0
1	0	1	0	0	0	63.01	0	104	153	111	1.48	2.05	6.5	1	1	1	1	1	1	6	6	1	0	0	1	0	0	1	0	0
2	0	1	0	0	0	31.05	0	81	130	100	1.18	1.93	5.7	1	1	1	1	1	1	6	6	1	0	0	1	0	0	1	0	0
1	0	1	0	0	1	46	0	104	144	106	0.75	6.75	6.34	1	1	1	1	1	1	6	6	1	0	0	1	0	0	1	0	0
1	0	1	0	0	0	42.04	0	86	153	80	1.1	1.18	5.3	0	0	0	0	1	0	2	7	0	1	0	0	0	0	0	1	0
1	0	1	0	0	0	26.04	0	83	130	70	1.53	1.4	6.1	0	0	0	1	1	0	3	7	0	1	0	0	0	0	0	1	0
1	0	1	0	0	1	50.07	0	82	120	85	1.33	1.62	7.02	0	0	0	1	1	0	3	7	0	1	0	0	0	0	0	1	0
1	0	1	0	0	0	43.03	0	93	134	80	2.2	1.52	5.11	0	0	0	0	1	1	3	3	0	1	0	0	1	0	1	0	0
1	0	1	0	0	0	34.1	0	106	135	85	1.07	1.62	5.3	0	0	0	0	1	1	3	3	0	1	0	0	1	0	1	0	0
1	0	1	0	0	0	58.06	0	90	130	70	2.14	0.71	5.9	1	0	0	1	1	1	4	4	0	1	0	0	1	0	1	0	0
1	0	1	0	0	0	33.09	0	103	125	89	1.35	0.49	6.04	1	0	0	1	1	1	4	4	0	1	0	0	1	0	1	0	0
2	0	1	0	0	1	39.01	0	83	125	89	2.03	0.74	5.8	1	0	0	1	1	1	4	4	0	1	0	0	1	0	1	0	0
2	0	1	0	0	0	27	0	78	130	80	1.16	4.2	4.85	1	1	1	0	1	0	4	7	0	1	0	0	0	0	0	1	0
2	0	1	0	0	0	41	0	72	130	70	0.92	2.3	4.53	1	1	1	0	1	0	4	7	0	1	0	0	0	0	0	1	0
[truncated: 6 more rows]
